# Supplementary material for: Activation of the cGAS-STING pathway by a mitochondrial DNA-targeted emissive rhodium(iii) metallointercalator
Source: Royal Society of Chemistry journal article supplement (doi:10.1039/d3sc01737k), 2023-01-01

Figure S5

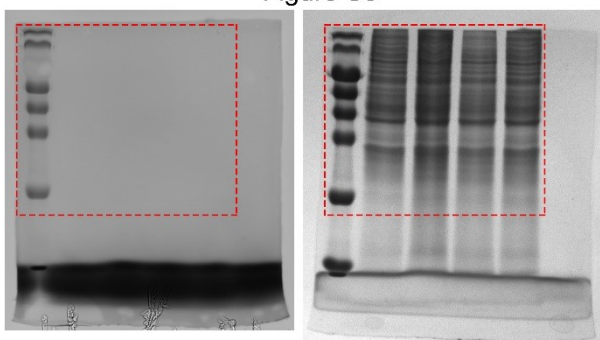

Figure 2D

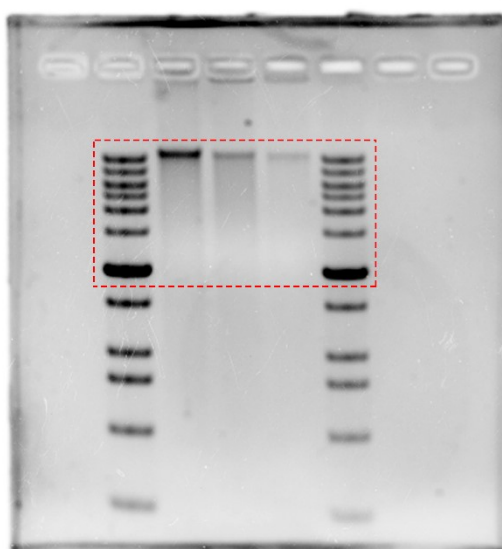

Figure 2J

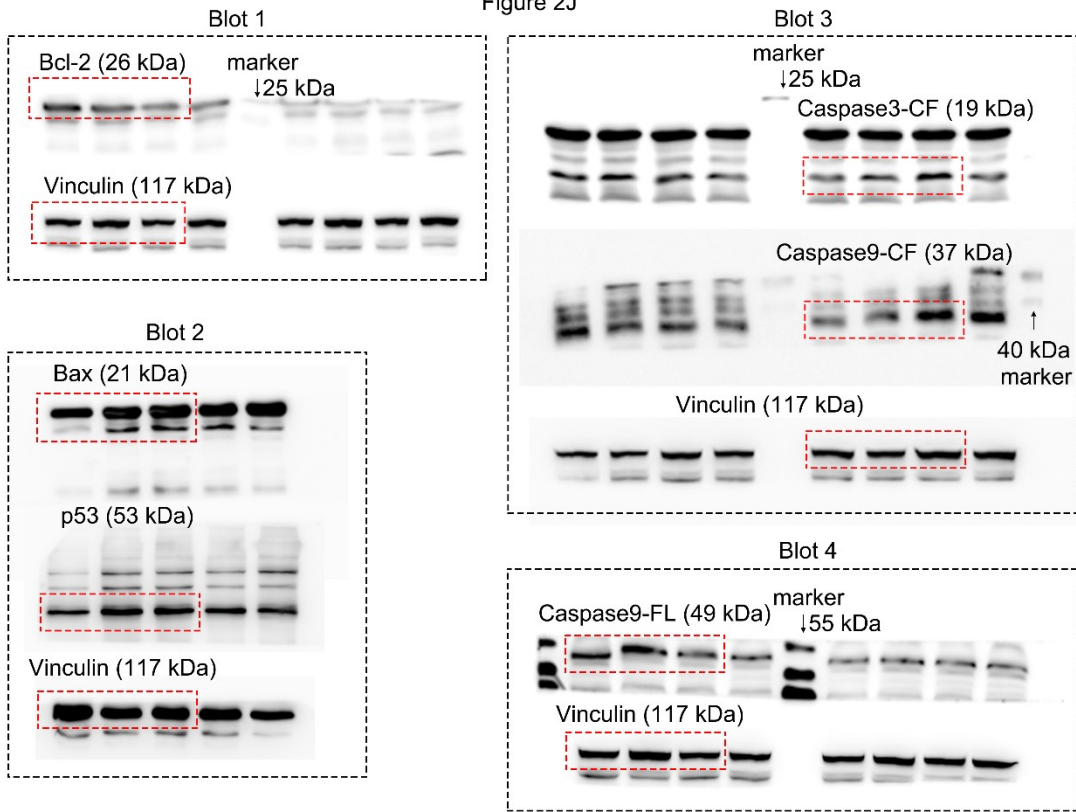

Figure 3E

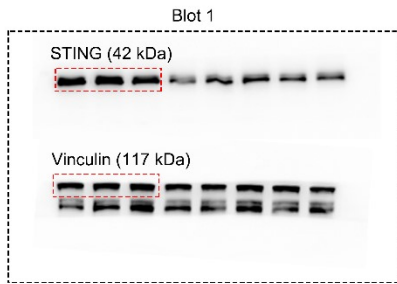

Figure 3F

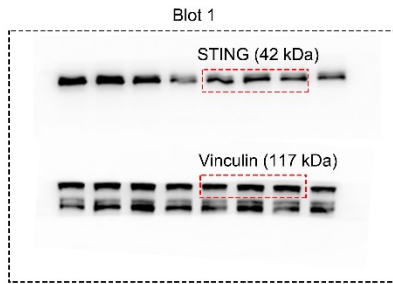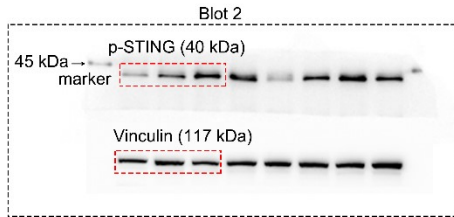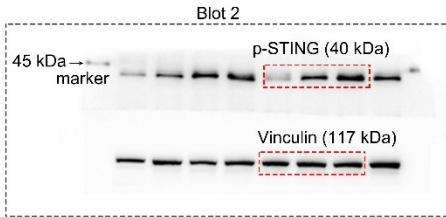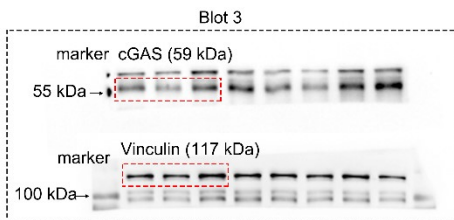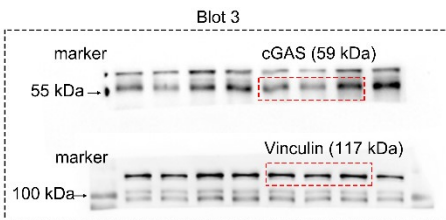

Figure 3G

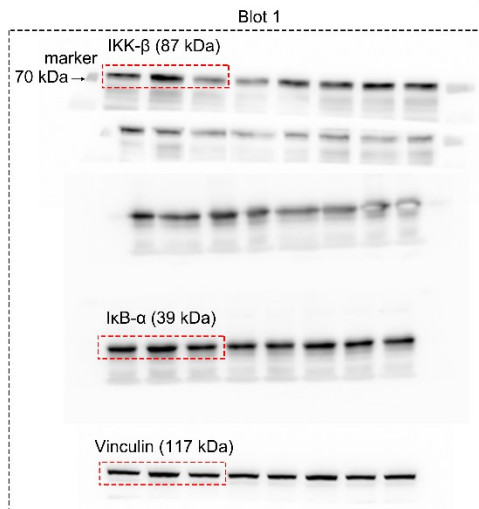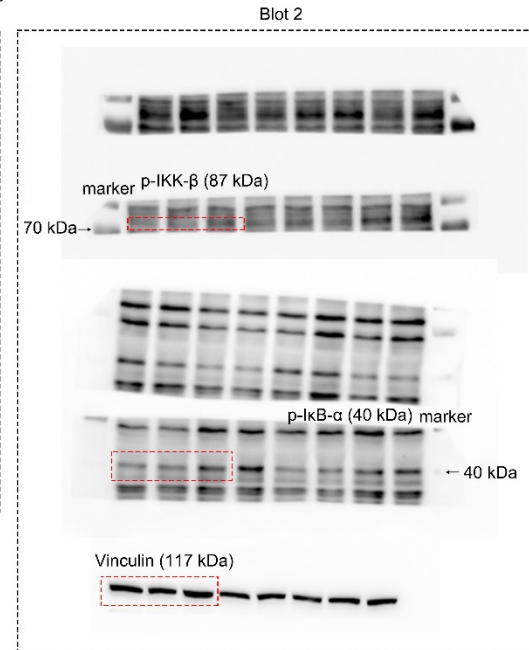

Figure 5A

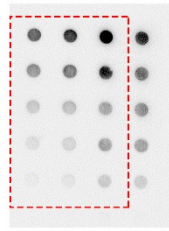

Figure S15

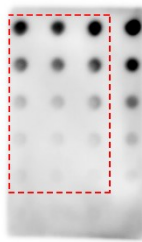

Figure S16

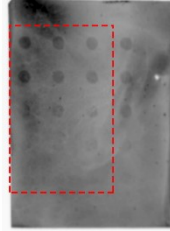

Figure 6D

Blot 1

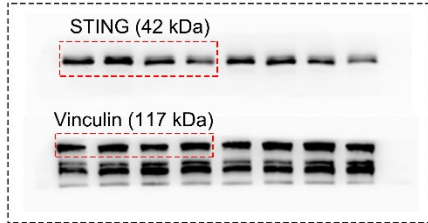

Figure 6E

Blot 1

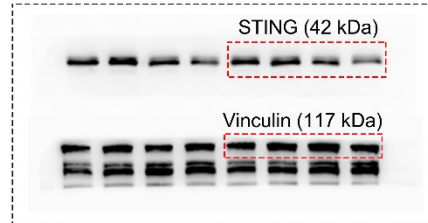

Blot 2

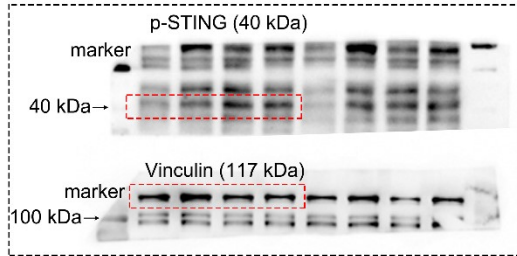

Blot 2

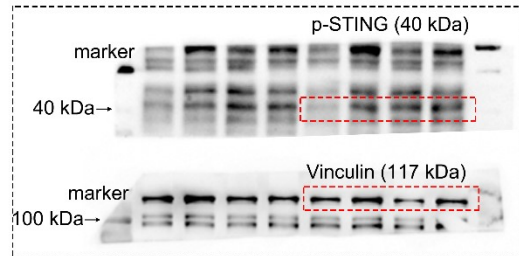

Blot 3

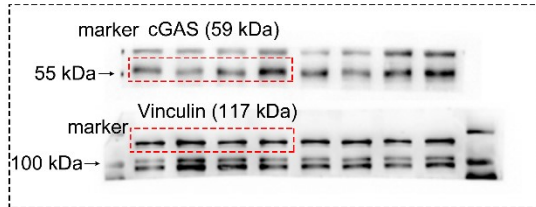

Blot 3

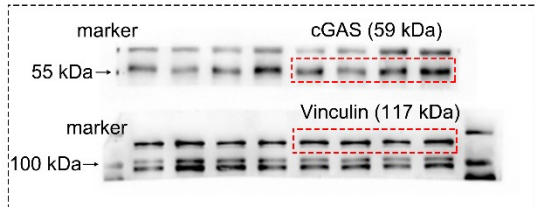

Supplement: d3sc01737k7.pdf [file d3sc01737k7.pdf]
