# Supplementary material for: Activation of the cGAS-STING pathway by a mitochondrial DNA-targeted emissive rhodium(iii) metallointercalator
Source: Royal Society of Chemistry journal article supplement (doi:10.1039/d3sc01737k), 2023-01-01
Supplement: d3sc01737k2.xlsx [file d3sc01737k2.xlsx]

## Sheet: Sheet1
Supplementary Data S1 The most prominent metabolites discriminated of Rh-Mito-treated group (1.0 μΜ, 6 h) compared to controls according to the VIP value and the p value in the positive mode
ID	Peak	RT (minutes)	VIP	P-VALUE	FOLD CHANGE	LOG_FOLDCHANGE
26	2-Amino-2-methyl-1,3-propanediol	371.138	1.15088	1.63258e-08	0.434194	-1.20359
36	Pyrrolidine	283.595	1.15521	3.32391e-08	0.49975	-1.00072
66	Trimethylamine N-oxide	325.2	1.1535	4.43169e-08	0.42567	-1.23219
120	gamma-Aminobutryic acid	354.709	1.15105	2.24127e-08	0.370745	-1.4315
126	4-Hydroxybutanoic acid lactone	354.735	1.15592	1.57516e-08	0.311016	-1.68494
145	L-Alanine	329.851	1.12415	2.55193e-07	0.540995	-0.886313
170	2(1H)-Pyridinone	54.316	1.15356	4.73265e-05	0.363156	-1.46134
224	Betaine aldehyde	301.639	1.07775	0.00403334	0.457655	-1.12767
258	4-Aminobutyric acid	354.709	1.12401	1.65608e-06	0.434215	-1.20352
262	Choline	368.378	1.03157	0.007906	0.575264	-0.797704
290	L-Serine	357.4	1.15765	1.25957e-08	0.471132	-1.0858
294	Diethanolamine	299.669	1.01579	0.000636286	0.664025	-0.59069
325	para-Phenylenediamine	39.969	1.14865	8.71031e-06	0.273361	-1.87112
369	Creatinine	329.858	1.12776	1.79373e-07	0.554969	-0.849521
379	N-Methylhydantoin	329.858	1.07905	2.40274e-05	0.529043	-0.918544
393	L-Proline	294.599	1.16412	2.26939e-10	0.343026	-1.54361
419	Betaine	258.493	1.00183	0.0148037	0.434411	-1.20287
423	L-Valine	283.469	1.11655	1.85963e-06	0.554388	-0.851031
430	Methylmalonic acid	160.862	1.15265	9.89848e-09	0.43016	-1.21706
434	2-Methyl-3-hydroxybutyric acid	224.218	1.04292	5.31333e-05	0.63799	-0.648394
446	L-Threonine	333.949	1.13092	7.09763e-05	0.551038	-0.859776
447	Tyramine	240.046	1.14766	1.22992e-07	0.449937	-1.15221
452	Gentisaldehyde	32.345	1.06579	4.52311e-05	0.58541	-0.772481
466	Glutaraldehyde	282.39	1.08594	1.21247e-06	0.434946	-1.20109
468	Nicotinamide	54.144	1.16038	3.22197e-06	0.346791	-1.52786
496	Picolinic acid	307.612	1.15493	2.11078e-09	0.231092	-2.11346
519	Taurine	279.054	1.14384	4.51284e-08	0.501774	-0.994891
584	D-Pipecolinic acid	499.971	1.05101	0.000195465	0.538976	-0.891707
585	.beta.-Homoproline	71.748	1.0037	0.000164554	0.433155	-1.20705
601	N-Acetylputrescine	321.942	1.13604	5.16313e-07	0.421289	-1.24712
608	Creatine	240.726	1.12715	2.01761e-06	0.552583	-0.855738
611	L-Leucine	247.354	1.15097	3.42241e-05	0.401534	-1.31641
623	L-Asparagine	357.575	1.15068	1.48826e-07	0.448614	-1.15645
625	1-Indanone	36.507	1.02984	0.00285889	0.515177	-0.956861
629	Ornithine	371.026	1.13663	3.51197e-07	0.460752	-1.11794
636	D-Aspartic acid	374.374	1.14583	1.29223e-05	0.486161	-1.04049
638	Mandelonitrile	108.49	1.15088	1.07722e-09	0.309142	-1.69366
640	Methyl acetoacetate	329.859	1.1309	2.16596e-07	0.53414	-0.904709
641	Glycerol	175.716	1.13581	0.000332244	0.172623	-2.53431
661	Adenine	152.11	1.13039	5.08854e-07	0.463678	-1.10881
665	Dopamine	282.449	1.14951	9.54455e-05	0.465177	-1.10415
680	Hypoxanthine	123.93	1.08171	1.56801e-07	0.199766	-2.32362
687	1-Methylnicotinamide	295.354	1.14524	6.32782e-07	0.595188	-0.748582
706	Anthranilic acid	265.751	1.13481	8.53015e-07	0.451099	-1.14848
720	Isocaproic acid	295.756	1.14356	7.34163e-07	0.60819	-0.717407
772	1-Aminocyclopropanecarboxylic acid	318.32	1.03358	0.00297555	0.558259	-0.840993
780	Larixinic Acid	245.323	1.14986	0.000134048	0.338487	-1.56283
820	(3-Carboxypropyl)trimethylammonium cation	358.944	1.15852	3.14005e-08	0.261758	-1.93369
821	Acetylcholine	180.848	1.06705	0.00350888	0.321007	-1.63932
828	Coumarin	282.451	1.13508	6.56268e-07	0.469206	-1.09171
831	D-Mannitol	35.88	1.03058	0.000132686	0.498615	-1.004
835	L-Lysine	499.795	1.05978	0.000101969	0.570718	-0.809151
890	Nitrosobenzene	50.592	1.01118	0.00886681	0.175202	-2.51291
899	L-Methionine	265.891	1.1468	9.10321e-08	0.360786	-1.47079
904	Ethylmalonic acid	123.792	1.1392	3.45959e-09	0.169139	-2.56372
915	L-Arabinose	102.263	1.1589	9.76024e-09	0.256849	-1.96101
937	N-Methylanthranilic Acid	230.164	1.07696	1.6935e-05	0.625962	-0.675854
943	Xanthine	205.126	1.16029	3.63828e-06	0.249304	-2.00402
965	Glycerol 3-phosphate	259.955	1.1063	0.000783478	0.428952	-1.22111
985	L-Histidine	364.472	1.14761	2.35102e-05	0.290588	-1.78295
989	Scopoline	349.305	1.14555	2.75964e-08	0.390583	-1.3563
1012	Propynoic acid	374.246	1.12331	9.98544e-07	0.513993	-0.960179
1034	Ser-Ala	336.336	1.09728	1.90486e-05	0.588348	-0.765257
1036	Phenelzine	240.726	1.13842	7.36613e-05	0.492542	-1.02168
1055	Cyclohexylamine	366.444	1.15923	1.70998e-08	0.298774	-1.74287
1061	N6-Methyl-L-lysine	514.605	1.10331	0.000399245	0.553861	-0.852403
1074	D-(+)-Galactosamine	146.839	1.11817	0.00167633	0.0739992	-3.75635
1099	Dimethylaminopurine	58.878	1.11325	4.69817e-06	0.238274	-2.0693
1110	Phenylpyruvate	282.389	1.13717	0.000132339	0.524511	-0.930955
1123	3-Methylxanthine	140.848	1.05278	0.000262227	0.560297	-0.835736
1128	L-Phenylalanine	240.046	1.14852	1.44852e-07	0.442599	-1.17593
1135	1,2-Benzenedicarboxylic acid	31.706	1.05744	8.74788e-05	0.584904	-0.773729
1137	2-Amino-3-methoxy-benzoic acid	110.784	1.02068	8.28986e-06	0.184067	-2.4417
1154	Pyridoxal (Vitamin B6)	100.205	1.13058	3.62361e-07	0.398064	-1.32893
1190	6-Hydroxydopamine	245.466	1.15847	1.30441e-05	0.160907	-2.6357
1191	Pyridoxine	108.033	1.14906	1.24163e-07	0.377024	-1.40727
1192	3-Methyl-L-histidine	358.843	1.05537	0.000199716	0.628212	-0.670676
1243	Pro-Gly	332.377	1.0758	0.000774836	0.319262	-1.64719
1280	L-Arginine	491.855	1.10407	1.4182e-05	0.560385	-0.83551
1295	N-Acetyl-L-aspartic acid	374.433	1.11756	1.61086e-06	0.568023	-0.815979
1296	L-Norleucine	247.321	1.11832	0.00153025	0.418812	-1.25563
1297	N-Carboxyethyl-.gamma.-aminobutyric acid	278.524	1.09945	1.21857e-05	0.225596	-2.14818
1300	L-Citrulline	370.928	1.15594	6.75835e-08	0.389749	-1.35938
1320	Indole	329.206	1.14476	8.40218e-09	0.376302	-1.41004
1358	Acetylglycine	371.945	1.13939	1.18396e-07	0.484201	-1.04632
1374	L-Tyrosine	282.389	1.15453	2.38652e-05	0.461322	-1.11615
1386	4-Hydroxybenzaldehyde	264.202	1.13266	6.91763e-07	0.423927	-1.23811
1403	Phosphorylcholine	473.369	1.04501	0.00175086	0.577163	-0.79295
1424	Pro-Ser	99.405	1.074	0.00213285	0.160766	-2.63697
1461	Hydroxyacetone	281.211	1.0992	1.12514e-05	0.480665	-1.0569
1470	Val-Ser	213.789	1.09414	0.00024355	0.22787	-2.13371
1472	3-Methylhistidine	177.501	1.13634	6.10789e-05	0.222847	-2.16587
1486	alpha-ketoglutarate	367.108	1.1394	4.10983e-09	0.153021	-2.7082
1488	DL-Indole-3-lactic acid	240.692	1.15583	1.32629e-05	0.415839	-1.2659
1514	L-NG-Monomethylarginine	482.996	1.06708	8.44987e-05	0.591813	-0.756786
1525	L-Pyroglutamic acid	367.803	1.13682	2.80108e-08	0.323409	-1.62857
1550	O-Acetyl-L-serine	377.292	1.15977	2.48819e-09	0.425607	-1.23241
1576	2-Isopropylmalic acid	277.887	1.10561	0.000245828	0.209197	-2.25706
1611	2-Phenylacetamide	45.049	1.00863	0.000183092	0.640997	-0.641611
1635	N-Acetyl-L-Histidine	270.564	1.12475	1.98167e-06	0.395452	-1.33843
1655	Pro-Thr	328.124	1.08925	0.00719347	0.129885	-2.9447
1686	5-L-Glutamyl-L-alanine	288.579	1.09467	4.78265e-07	0.417252	-1.26101
1689	Leu-Ser	366.612	1.12131	0.00133148	0.335841	-1.57415
1701	3-Hydroxybenzoate	224.183	1.06429	2.11052e-05	0.625929	-0.675928
1705	Glucosamine	361.652	1.13009	1.52564e-08	0.228662	-2.12871
1708	Simazine	41.467	1.13818	1.7359e-07	0.490368	-1.02806
1711	Pimelic acid	257.871	1.07633	3.18612e-05	0.471468	-1.08477
1730	Leu-Ala	325.891	1.05629	0.00245117	0.353691	-1.49944
1732	NG,NG-dimethyl-L-arginine(ADMA)	473.349	1.08101	6.08636e-05	0.597837	-0.742175
1747	N-Acetylmannosamine	245.456	1.153	5.21635e-08	0.349891	-1.51502
1756	Acetylcarnitine	289.219	1.16723	3.68871e-06	0.341594	-1.54964
1776	Xanthurenic acid	349.975	1.10682	1.81448e-05	0.132025	-2.92112
1804	Dihydrolipoate (dihydrolipoic acid)	285.184	1.02595	0.00743563	0.479262	-1.06111
1840	Val-Gln	287.989	1.0347	9.67243e-05	0.495457	-1.01317
1862	N6,N6,N6-Trimethyl-L-lysine	36.57	1.00937	0.000113507	0.607446	-0.719173
1911	Suberylglycine	429.552	1.1556	3.3557e-08	0.492616	-1.02147
1931	sn-Glycerol 3-phosphoethanolamine	375.007	1.14097	7.12886e-05	0.59737	-0.743302
1948	N-.alpha.-Acetyl-L-arginine	351.315	1.1441	5.02031e-05	0.411153	-1.28225
2002	Pantothenate	257.875	1.14663	5.47318e-08	0.414283	-1.27131
2029	D-Mannose	356.685	1.12313	0.000138319	0.223781	-2.15984
2030	N-Acetyl-D-glucosamine	245.443	1.14859	1.32995e-05	0.339555	-1.55828
2158	Pro-Asn	297.263	1.14189	4.02042e-10	0.243338	-2.03896
2159	Diphenylamine	365.856	1.04411	0.00275823	0.372843	-1.42336
2177	Pro-Asp	402.364	1.05133	2.32883e-05	0.564818	-0.824142
2196	Lys-Cys	283.432	1.14822	8.8483e-08	0.194034	-2.36562
2402	D-Mannose-6-phosphate	380.776	1.12865	4.57729e-07	0.373071	-1.42248
2406	Lumichrome	48.102	1.08907	7.47645e-06	0.270076	-1.88856
2428	Flumequine	265.978	1.13711	0.000189208	0.379174	-1.39907
2432	Theophylline	245.443	1.1492	9.72232e-08	0.288118	-1.79527
2433	Cytidine	325.907	1.00541	0.00752641	0.449713	-1.15292
2463	Uridine	245.342	1.15517	3.73402e-06	0.30435	-1.7162
2464	Monoethylglycylxylidide (MEGX)	315.557	1.05018	3.17651e-05	0.378816	-1.40043
2465	Pro-Glu	396.122	1.12632	0.000224766	0.493117	-1.02
2489	Pro-Met	448.698	1.1347	7.05186e-08	0.566326	-0.820295
2491	Ala-Asp	327.206	1.07075	0.00837325	0.225765	-2.1471
2503	2-Methylbutyroylcarnitine	225.563	1.16762	2.045e-06	0.191017	-2.38822
2505	Lys-Val	514.911	1.11793	0.000193947	0.560529	-0.835139
2555	His-Gln	76.3565	1.15482	0.000128309	0.127041	-2.97663
2684	Deoxyinosine	173.736	1.04099	6.68123e-05	0.203822	-2.29462
2816	L-Cystine	257.873	1.13588	5.38599e-05	0.437501	-1.19264
2821	5-Methylcytidine	234.503	1.12942	7.68444e-06	0.360998	-1.46994
2823	2'-O-methylcytidine	164.711	1.12336	1.01305e-08	0.277521	-1.84933
2857	D-Glucose 6-phosphate	375.007	1.06662	3.14505e-05	0.693727	-0.527561
2910	D-Biotin	379.657	1.13238	5.40726e-05	0.605267	-0.724357
2939	Met-Met	156.034	1.12812	5.26597e-07	0.159675	-2.64679
2948	6-Aminocaproic acid	45.51	1.15293	7.13101e-05	0.194789	-2.36001
2985	Benzamide	156.013	1.12637	1.81151e-07	0.139184	-2.84493
2987	Thiamine	345.795	1.13846	5.96485e-07	0.533271	-0.90706
3002	Diethylcarbamazine	393.528	1.11428	0.000429957	0.238476	-2.06808
3033	N-Acetyl-L-tyrosine	310.33	1.08873	0.000475686	0.339477	-1.55862
3054	Inosine	206.275	1.16556	6.64478e-06	0.21947	-2.18791
3177	Palmitic acid	50.129	1.02166	0.0169361	0.335123	-1.57724
3183	1,2,3-Benzenetriol	388.187	1.13443	0.000233015	0.228827	-2.12767
3210	Kinetin	240.607	1.12318	0.000138293	0.570808	-0.808921
3217	.gamma.-L-Glu-.epsilon.-L-Lys	389.322	1.0847	6.92898e-06	0.416702	-1.26291
3230	gamma-L-Glutamyl-L-glutamic acid	438.642	1.11984	0.000262843	0.33308	-1.58606
3233	L-Saccharopine	428.711	1.14628	2.04425e-05	0.485426	-1.04268
3247	D-Mannose 1-phosphate	306.999	1.1595	5.70518e-09	0.239717	-2.0606
3292	Phthalic acid Mono-2-ethylhexyl Ester	32.366	1.0713	1.85415e-05	0.584228	-0.775398
3353	sphingosine	129.107	1.15191	3.98373e-05	0.227121	-2.13847
3373	2'-O-methylinosine	140.739	1.10077	4.73932e-06	0.330473	-1.59739
3393	Guanosine	247.573	1.0653	5.81173e-05	0.57107	-0.808262
3415	Xanthosine	293.597	1.11053	7.40541e-07	0.396094	-1.33608
3438	N4-Acetylcytidine	156.018	1.13454	9.38156e-05	0.29902	-1.74169
3478	Heptadecanoic acid	42.385	1.01528	0.00549269	0.408622	-1.29116
3517	Arg-Asp	461.702	1.13018	0.000171042	0.477853	-1.06536
3544	Argininosuccinic acid	446.989	1.11374	7.56141e-06	0.499923	-1.00022
3563	Glu-Cys	357.874	1.16138	2.35397e-06	0.263409	-1.92462
3605	Ergothioneine	291.798	1.13659	0.000126382	0.24287	-2.04175
3624	isocarboxazid	35.85	1.00211	0.00435751	0.487762	-1.03575
3687	2'-O-methylguanosine	185.76	1.13483	1.07544e-07	0.281973	-1.82637
3699	Linoleic acid	62.151	1.12089	0.00047608	0.18962	-2.39881
3737	Sphingosine	98.8145	1.1553	1.23161e-08	0.279268	-1.84028
3738	Palmitoyl ethanolamide	35.901	1.13941	2.50666e-05	0.40397	-1.30768
3751	3-Phenylpropanoic acid	31.81	1.04855	2.93376e-05	0.541969	-0.883717
3805	Eicosapentaenoic acid	44.715	1.1264	0.000273752	0.242671	-2.04293
3840	N-Acetylaspartylglutamate (NAAG)	422.362	1.14785	0.000144549	0.304617	-1.71493
3869	1-Naphthol	390.518	1.10102	2.201e-05	0.642636	-0.637926
3921	Pseudouridine	154.625	1.09034	9.46378e-07	0.367291	-1.44501
3956	Zidovudine	37.149	1.16338	0.000597113	41.929	5.38988
3977	N-Acetylneuraminic acid	357.874	1.15682	3.22534e-06	0.256294	-1.96413
4002	Cyclizine	37.175	1.14073	1.67549e-07	3.18307	1.67042
4009	Methoprene (S)	41.477	1.15346	3.74297e-08	0.542031	-0.883552
4016	N2,N2-Dimethylguanosine	180.359	1.13127	5.82382e-07	0.244797	-2.03034
4037	1-Palmitoylglycerol	40.8	1.02384	0.000130263	0.590038	-0.761121
4054	Arbutin	287.619	1.13232	0.00109567	0.260217	-1.94221
4133	Arg-Thr	401.62	1.03295	0.000323218	0.648615	-0.624566
4136	15-Deoxy-delta-12,14-PGJ2	86.774	1.16001	4.89107e-05	0.192686	-2.37568
4175	5-Oxo-ETE	45.316	1.10573	7.03347e-06	0.503392	-0.990246
4231	O-Phospho-DL-Tyrosine	461.67	1.15319	3.37159e-05	0.336386	-1.57181
4268	Cytidine 5'-monophosphate	424.422	1.14132	0.00013466	0.428202	-1.22364
4331	N-Oleoylethanolamine	35.846	1.1498	5.81331e-05	0.352111	-1.5059
4364	Phe-Tyr	206.722	1.15881	2.27685e-05	0.325051	-1.62126
4378	Ile-Met	375.126	1.08279	0.00192675	0.298465	-1.74437
4385	(4Z,7Z,10Z,13Z,16Z,19Z)-4,7,10,13,1 6,19-Docosahexaenoic acid	45.113	1.12876	1.24505e-07	0.558436	-0.840537
4440	SANGUINARINE	357.626	1.16123	1.01643e-09	0.239766	-2.0603
4526	Amitraz	86.0585	1.16116	1.87846e-05	0.240184	-2.05779
4577	MG(18:2(9Z,12Z)/0:0/0:0)[rac]	40.836	1.0854	0.000325688	0.725142	-0.463665
4642	1-Stearoyl-rac-glycerol	227.802	1.09179	0.000940317	0.412845	-1.27633
4684	20-Hydroxyarachidonic acid	45.2945	1.06077	8.29801e-05	0.500199	-0.999425
4695	(-)-Usnic acid	349.939	1.12643	3.74811e-07	0.432168	-1.21034
4733	Retinene	45.515	1.09471	1.29516e-05	0.626457	-0.674713
4765	N-Desmethylselegiline	45.302	1.14157	2.00754e-07	0.609726	-0.713767
4775	Adenosine monophosphate (AMP)	413.227	1.11176	0.00013361	0.456843	-1.13023
4778	Fluoxetine	364.755	1.14093	9.12803e-05	0.315351	-1.66497
4924	Pentoxifylline	73.5145	1.14451	2.04089e-08	0.410942	-1.28299
5018	3.alpha.-Mannobiose	381.065	1.12341	1.10759e-06	0.577965	-0.790945
5036	Promethazine	377.007	1.13944	1.45113e-07	0.383234	-1.3837
5100	1-methylguanosine	369.719	1.12315	4.68144e-06	0.473833	-1.07755
5373	(-)-Riboflavin	200.316	1.14815	2.9319e-05	0.341743	-1.54902
5517	S-Adenosyl-L-homocysteine	362.857	1.12882	0.000103732	0.590009	-0.761191
5678	Irbesartan	152.202	1.14392	0.00083742	0.182701	-2.45244
6035	Psoralen	37.196	1.16096	8.18567e-06	114.353	6.83735
6241	Uridine 5'-diphosphate (UDP)	458.867	1.15089	5.4563e-05	0.313919	-1.67154
6339	Tyr-Met	341.826	1.08339	4.4749e-05	0.654327	-0.611916
6373	Stearoylcarnitine	146.101	1.16708	3.91925e-05	23.805	4.57319
6414	alpha-Tocopherol (Vitamin E)	32.396	1.09656	8.16963e-06	0.55971	-0.837248
6668	25-Hydroxycholesterol	32.772	1.04851	8.03081e-05	0.580298	-0.785135
6723	Verapamil	33.878	1.07624	0.00137221	0.529526	-0.917228
6857	1-Palmitoyl-2-hydroxy-sn-glycero-3-phosphoethanolamine	182.773	1.15975	1.39996e-05	0.173893	-2.52373
7110	1-Myristoyl-sn-glycero-3-phosphocholine	179.35	1.16293	4.7964e-06	0.251646	-1.99053
7293	Glycolithocholic acid	181.317	1.13115	5.16403e-07	0.372161	-1.426
7373	Taurodeoxycholic acid	217.009	1.14671	0.000624219	0.180913	-2.46664
7494	Cytidine 5'-diphosphocholine (CDP-choline)	422.364	1.11462	0.00199942	0.312464	-1.67824
7620	1-Palmitoyl-sn-glycero-3-phosphocholine	174.398	1.16206	2.74138e-05	0.185099	-2.43363
7726	C-8 Ceramide	34.475	1.0457	8.45858e-05	0.609562	-0.714156
7754	1-Eicosatrienoyl-sn-glycero-3-phosphoethanolamine	177.43	1.10685	1.33321e-06	0.400438	-1.32035
7794	1-Stearoyl-2-hydroxy-sn-glycero-3-phosphocholine	164.724	1.08883	6.42105e-05	0.17966	-2.47666
7829	Ile-Asn	146.101	1.04153	5.6863e-05	0.614055	-0.703559
7869	1-O-Octadecyl-sn-glyceryl-3-phosphorylcholine	174.765	1.11678	0.000362928	0.180012	-2.47383
7886	Leu-Leu	172.406	1.16225	2.12778e-05	0.19332	-2.37094
7890	Lyso-PAF C-18	175.056	1.15899	2.27784e-05	0.195617	-2.35389
8068	Ile-Glu	179.496	1.10155	0.000264314	0.274433	-1.86547
8092	1-Oleoyl-sn-glycero-3-phosphocholine	171.147	1.15121	2.35819e-06	0.201637	-2.31017
8135	1-Stearoyl-sn-glycerol 3-phosphocholine	171.036	1.15926	2.27575e-06	0.166306	-2.58809
8564	Maltotriose	422.362	1.05978	0.00141561	0.461754	-1.1148
8656	1-O-(cis-9-Octadecenyl)-2-O-acetyl-sn-glycero-3-phosphocholine	168.121	1.15565	1.36145e-05	0.151928	-2.71854
9537	Uridine 5'-diphosphoglucuronic acid (UDP-D-glucuronate)	458.783	1.15316	1.31667e-08	0.293651	-1.76783
9747	UDP-N-acetylglucosamine	411.825	1.14419	5.59302e-05	0.398698	-1.32663
9900	Glutathione disulfide	473.037	1.11566	2.19407e-05	0.134208	-2.89746
9935	Cytidine monophosphate N-acetylneuraminic acid	473.037	1.12579	1.76842e-06	0.222293	-2.16947
10807	Nicotinamide adenine dinucleotide (NAD)	415.901	1.13657	1.09387e-06	0.294429	-1.76401
11146	KOdiA-PC	45.177	1.13963	1.25119e-07	0.324305	-1.62458
11636	Stachyose	468.003	1.12468	0.000285352	0.485292	-1.04308
12560	PC(16:0/16:0)	131.782	1.14199	2.84195e-07	0.478695	-1.06282
13108	Thioetheramide-PC	129.814	1.15137	3.7577e-06	0.441888	-1.17825
13229	Flavin adenine dinucleotide (FAD)	378.287	1.15249	1.7132e-07	0.414209	-1.27157
13679	1,2-dioleoyl-sn-glycero-3-phosphatidylcholine	127.823	1.15533	8.92742e-06	0.429947	-1.21777
14078	1-Stearoyl-2-oleoyl-sn-glycerol 3-phosphocholine (SOPC)	126.521	1.15149	1.42646e-08	0.376044	-1.41103
14562	Maltopentaose	485.946	1.14468	8.68256e-05	0.522745	-0.935821
