# Supplementary material for: Activation of the cGAS-STING pathway by a mitochondrial DNA-targeted emissive rhodium(iii) metallointercalator
Source: Royal Society of Chemistry journal article supplement (doi:10.1039/d3sc01737k), 2023-01-01
Supplement: d3sc01737k3.xlsx [file d3sc01737k3.xlsx]

## Sheet: Sheet1
Supplementary Data S2 The most prominent metabolites discriminated of Rh-Mito-treated group (1.0 μΜ, 6 h) compared to controls according to the VIP value and the p value in the negative mode
ID	Peak	RT (minutes)	VIP	P-VALUE	FOLD CHANGE	LOG_FOLDCHANGE
40	Dihydroxyacetone	153.075	1.20559	0.0107545	0.676913	-0.562957
273	Glyceric acid	289.047	1.3135	4.17902e-05	0.495918	-1.01183
334	Uracil	88.54	1.39797	1.19735e-07	0.422694	-1.24231
380	L-Proline	294.547	1.34256	2.31776e-05	0.657521	-0.60489
387	Fumaric acid	389.748	1.33298	2.79906e-05	0.375191	-1.4143
501	Taurine	279.108	1.06558	0.00656145	0.811915	-0.300599
555	Barbituric acid	88.38	1.31926	6.9716e-05	0.655444	-0.609454
560	Dihydrothymine	354.254	1.24061	0.000147939	1.28085	0.357105
573	L-Pyroglutamic acid	248.672	1.4208	3.80659e-08	0.274028	-1.8676
599	N-Acetyl-L-alanine	241.905	1.3372	1.58375e-05	0.516888	-0.952077
603	L-Norleucine	248.139	1.35383	1.96021e-05	0.680611	-0.555098
624	Maleic acid	383.371	1.38597	2.70988e-06	0.393865	-1.34423
643	L-Malic acid	389.632	1.35237	4.59656e-06	0.355866	-1.4906
683	L-Threonate	300.056	1.27025	0.0023614	0.708359	-0.497447
687	Hypoxanthine	207.248	1.38601	0.000206308	0.483466	-1.04851
791	2-Oxoadipic acid	342.048	1.11229	0.00240329	1.22347	0.290982
831	Ammeline	45.4425	1.17859	0.0112663	1.6741	0.743385
862	L-Glutamine	354.353	1.23052	9.86014e-05	1.28133	0.357642
871	L-Glutamate	377.434	1.13811	0.00460298	0.787336	-0.344948
890	(S)-2-Hydroxyglutarate	374.714	1.10965	0.00516292	0.792972	-0.334657
907	L-Methionine	265.99	1.31605	6.60253e-05	0.604997	-0.725
912	N6-Methyladenine	125.019	1.41174	2.26762e-05	0.475006	-1.07398
928	D-Xylulose	133.817	1.34691	0.000648774	0.57105	-0.808311
955	Xanthine	205.513	1.39616	5.13114e-07	0.493863	-1.01782
993	L-Asparagine	231.285	1.29056	2.00528e-05	0.557038	-0.844152
997	Anthranilic acid (Vitamin L1)	297.127	1.33907	2.74519e-06	1.48033	0.565924
1023	3-Hydroxyisovaleric acid	218.474	1.34961	1.98801e-05	0.540845	-0.886713
1026	2'-Deoxy-D-ribose	342.533	1.16578	0.00144995	1.28604	0.362932
1065	Allantoin	174.985	1.10848	0.00344144	0.817913	-0.28998
1119	Glucosamine	260.6	1.38829	4.92845e-06	0.574957	-0.798473
1187	L-Phenylalanine	240.241	1.26591	0.000176323	0.751532	-0.412093
1189	Benzenebutanoic acid	289.732	1.38819	1.30676e-06	0.221296	-2.17595
1202	1-Methylxanthine	112.179	1.37424	2.03925e-06	0.304261	-1.71662
1240	Uric acid	307.223	1.22355	0.000559024	0.759418	-0.397035
1397	L-Citrulline	370.833	1.22902	0.00137162	0.773492	-0.370541
1437	L-Gulonic gamma-lactone	149.508	1.25074	0.00011513	1.97711	0.983393
1469	D-Fructose	290.197	1.36203	1.15408e-06	0.268958	-1.89455
1652	3-Hydroxycapric acid	48.314	1.29751	0.0027837	0.478149	-1.06447
1677	Phosphoenolpyruvate	410.12	1.26905	0.000766262	0.673972	-0.569239
1699	N-Acetyl-DL-methionine	186.448	1.34171	9.80917e-06	0.404524	-1.3057
1722	Jasmonic acid	39.438	1.27867	4.14101e-05	0.569012	-0.81347
1749	D-galacturonic acid	368.722	1.0825	0.00967932	0.737267	-0.439742
1785	Galactonic acid	356.373	1.40394	8.80079e-05	0.30376	-1.719
1829	Nitrofurazone	24.509	1.19693	0.00128333	1.72983	0.790633
1876	Dodecanoic acid	47.536	1.2566	0.000194458	1.27128	0.346287
1961	L-Tryptophan	240.941	1.26943	0.000302649	0.722123	-0.469684
2070	D-Ribose	154.245	1.32435	0.000113421	0.580382	-0.784926
2108	D-Ribulose 5-phosphate	275.857	1.36434	7.72737e-07	0.395896	-1.33681
2136	Perseitol	248.139	1.03006	0.0146866	0.849338	-0.23559
2149	1-Deoxy-D-xylulose 5-phosphate	330.654	1.20755	0.00142802	0.803806	-0.315081
2150	m-Chlorohippuric acid	161.688	1.40246	7.79448e-05	0.379792	-1.39672
2174	sn-Glycerol 3-phosphoethanolamine	375.233	1.2176	0.000420091	1.26595	0.340215
2193	2-keto-D-Gluconic acid	25.697	1.10542	0.00307347	1.32413	0.405045
2207	3-Hydroxydodecanoic acid	47.12	1.3679	7.20426e-06	0.521734	-0.938615
2275	Pantothenate	257.93	1.2774	0.000230444	0.667016	-0.584207
2283	L-Iditol	288.897	1.18046	0.000465813	0.476984	-1.06799
2293	4-Nonylphenol	47.82	1.29045	0.000142698	1.46807	0.553919
2307	N-Acetylmannosamine	245.663	1.37292	4.99136e-06	0.546677	-0.87124
2309	N-Acetyl-D-glucosamine	263.839	1.2096	6.07848e-05	0.465716	-1.10248
2336	Cytosine	83.4315	1.00136	0.00658001	1.31594	0.396089
2825	D-Glucose 6-phosphate	381.004	1.1745	0.000601477	0.638922	-0.646289
2844	Pentadecanoic Acid	45.423	1.12714	0.00308693	1.22238	0.289695
2891	Pseudouridine	231.285	1.32196	3.86674e-06	0.493698	-1.0183
2894	D-Biotin	368.722	1.31379	0.000110702	2.10238	1.07203
2908	alpha-hydroxy myristic acid	46.574	1.33446	4.8485e-05	0.674363	-0.568403
3260	Thymidine	139.029	1.10919	0.0010352	0.63336	-0.658902
3262	2'-O-Methyluridine	91.091	1.04159	0.00522688	0.756425	-0.402731
3292	D-Glucosamine 1-phosphate (Glucosamine-1P)	396.737	1.2791	0.000238426	0.652585	-0.615763
3507	Inosine	207.204	1.42572	1.33999e-05	0.333884	-1.58258
3519	Hexadecanedioic acid	46.316	1.39351	1.8231e-08	2.43396	1.28331
3576	Heptadecanoic acid	44.074	1.30968	0.00100938	1.39967	0.485091
3770	2-C-Methyl-D-erythritol 2,4-cyclodiphosphate	361.912	1.13404	0.00426397	0.80669	-0.309914
3788	alpha-Linolenic acid	44.744	1.07858	0.00701785	0.835378	-0.259499
3849	Linoleic acid	44.198	1.01985	0.0113692	0.865673	-0.208106
3896	3'-O-Methylinosine	141.498	1.03055	0.0078577	0.636993	-0.65065
3915	N-Acetylglucosamine 1-phosphate	411.611	1.00806	0.0139375	0.796127	-0.32893
3957	Xanthosine	293.368	1.18443	0.00106697	0.662204	-0.594652
3975	Stearic acid	44.494	1.28009	0.000165841	1.45506	0.541079
4114	5'-Deoxyadenosine	174.359	1.131	0.00421946	0.434925	-1.20116
4115	N-Tris[hydroxymethyl]methyl-2-aminoethanesulfonic acid [TES]	247.936	1.30394	0.000179899	0.734805	-0.444566
4242	9-OxoODE	46.574	1.36421	2.89759e-06	1.71876	0.781368
4287	Dantrolene	139.078	1.24769	0.000195245	0.686294	-0.543101
4302	9(S)-HODE	46.804	1.36171	6.65668e-06	1.57305	0.653565
4318	S-Methyl-5'-thioadenosine	101.842	1.29557	0.000656883	1.68891	0.756088
4320	2'-O-methylguanosine	186.608	1.2428	6.47073e-05	0.513127	-0.962612
4500	Oxazepam	163.076	1.03535	0.0265943	1.66391	0.734577
4526	N-Acetylaspartylglutamate (NAAG)	422.119	1.25899	0.00105747	0.635149	-0.654834
4611	Dihomo-gamma-Linolenic Acid	42.734	1.35117	2.67683e-05	0.703127	-0.508143
4680	N-Acetylneuraminic acid	358.333	1.39525	0.000337911	0.439629	-1.18564
4907	15-Deoxy-delta-12,14-PGJ2	110.584	1.40558	5.24922e-07	0.316479	-1.65982
5006	N6-Methyl-L-lysine	47.005	1.39036	1.50014e-06	0.561001	-0.833924
5247	Picrotoxinin	169.019	1.16936	0.00280153	0.461028	-1.11707
5364	8-iso-Prostaglandin A2	110.462	1.39395	0.000326389	0.292346	-1.77425
5749	Inosine 5'-monophosphate (IMP)	422.119	1.12578	0.00434278	0.773569	-0.370399
5808	PGE3	114.491	1.05649	0.0134158	0.45892	-1.12369
6029	Xanthopterin	26.496	1.3657	0.000329039	0.490132	-1.02876
6323	20-hydroxy-PGF2a	205.156	1.43073	2.67811e-06	0.348302	-1.52159
7075	Oxacillin	158.228	1.04605	0.00936616	0.81245	-0.299649
7118	Uridine diphosphate (UDP)	458.658	1.19313	0.00492781	0.637687	-0.64908
7173	Ethynodiol diacetate	177.832	1.41101	2.7842e-07	0.445959	-1.16502
8415	Buprenorphine	181.49	1.39329	2.18611e-06	0.430004	-1.21758
9626	Cyclic adenosine diphosphate ribose	415.321	1.09617	0.00455461	0.638995	-0.646124
9741	Cytidine 5'-diphosphocholine (CDP-choline)	422.119	1.17681	0.00439812	0.680675	-0.554962
10276	1-Stearoyl-sn-glycerol 3-phosphocholine	170.582	1.40211	4.203e-08	0.414336	-1.27113
10540	Uridine 5'-diphosphoglucuronic acid	458.658	1.28092	0.000417077	0.628533	-0.669939
10614	UDP-N-acetylglucosamine	411.626	1.16803	0.00325349	0.741599	-0.431289
10647	Arachidonic Acid (peroxide free)	43.104	1.10817	0.00551499	0.76815	-0.38054
10707	Glutathione disulfide	472.746	1.29851	3.64468e-05	0.277525	-1.84931
10749	Cytidine monophosphate N-acetylneuraminic acid	423.656	1.2795	0.000454026	0.705254	-0.503784
11439	Nicotinamide adenine dinucleotide (NAD)	415.321	1.18247	0.0011088	0.648586	-0.62463
13052	2-Oleoyl-1-stearoyl-sn-glycero-3-phosphoserine	177.624	1.09981	0.0319839	2.0226	1.01621
