# Supplementary material for: Activation of the cGAS-STING pathway by a mitochondrial DNA-targeted emissive rhodium(iii) metallointercalator
Source: Royal Society of Chemistry journal article supplement (doi:10.1039/d3sc01737k), 2023-01-01
Supplement: d3sc01737k4.xlsx [file d3sc01737k4.xlsx]

## Sheet: Sheet1
Supplementary Data S3. Differentially methylated regions (DMRs) in promotors identified by RRBS in HeLa cells treated with Rh-Mito (1.0 μM) for 6 h
Chr	Start	End	CpGs	Control	Rh4	Diff	p_val1	p_val2	FDR
chr1	534790	535168	5	0.61073	0.71527	-0.104533	0.33	0.63	0.335586
chr1	544841	544882	5	0.7224	0.8836	-0.1612	0.0066	0.066	0.0294304
chr1	544912	545143	9	0.751	0.90404	-0.153037	6.6e-06	0.00011	0.000219058
chr1	545553	545585	5	0.64447	0.8042	-0.159733	0.0045	0.04	0.0238952
chr1	763199	763328	44	0.27806	0.42753	-0.14947	9.3e-09	9.8e-06	6.13404e-07
chr1	842404	842437	7	0.44757	0.57062	-0.123048	0.0012	0.0077	0.0114957
chr1	861402	861476	5	0.5434	0.7126	-0.1692	0.024	0.065	0.0590008
chr1	917905	917982	5	0.69667	0.83473	-0.138067	0.1	0.16	0.134759
chr1	918311	918375	5	0.8178	0.9228	-0.105	0.093	0.16	0.12948
chr1	962004	962143	11	0.97879	0.87633	0.102455	4.9e-05	7.6e-05	0.00115777
chr1	1002304	1002336	5	0.1496	0.25547	-0.105867	0.093	0.35	0.12948
chr1	1003600	1003633	5	0.80573	0.6732	0.132533	0.024	0.065	0.0590008
chr1	1004948	1004981	5	0.38107	0.554	-0.172933	0.049	0.35	0.088355
chr1	1005005	1005033	7	0.37229	0.56395	-0.191667	0.019	0.046	0.0517666
chr1	1010858	1010931	5	0.33013	0.2136	0.116533	0.071	0.35	0.109797
chr1	1054212	1054375	5	0.5866	0.71113	-0.124533	0.25	0.63	0.262712
chr1	1078238	1078330	5	0.70013	0.82553	-0.1254	0.003	0.023	0.0191201
chr1	1080032	1080070	5	0.8376	0.71807	0.119533	0.049	0.24	0.088355
chr1	1080644	1080702	5	0.57953	0.3984	0.181133	0.011	0.0036	0.0386271
chr1	1091588	1091670	5	0.779	0.8868	-0.1078	0.25	0.63	0.262712
chr1	1098246	1098280	5	0.54773	0.65233	-0.1046	0.31	0.64	0.317078
chr1	1100567	1100584	5	0.35353	0.50067	-0.147133	0.0045	0.013	0.0238952
chr1	1107131	1107226	7	0.53295	0.70248	-0.169524	0.034	0.032	0.0724399
chr1	1108723	1108772	5	0.42473	0.52933	-0.1046	0.019	0.066	0.0517666
chr1	1114414	1114430	5	0.78033	0.67627	0.104067	0.25	0.49	0.262712
chr1	1115129	1115218	5	0.37333	0.25053	0.1228	0.033	0.16	0.0706102
chr1	1140462	1140664	5	0.60653	0.72673	-0.1202	0.12	0.17	0.15276
chr1	1142765	1142886	5	0.84093	0.74	0.100933	0.078	0.35	0.116508
chr1	1168034	1168040	5	0.78053	0.88247	-0.101933	0.019	0.041	0.0517666
chr1	1185705	1185767	6	0.20839	0.31583	-0.107444	0.023	0.19	0.0590008
chr1	1188040	1188380	26	0.93273	0.8915	0.105367	0.089	0.13	0.128052
chr1	1217467	1217512	5	0.40767	0.55447	-0.1468	0.017	0.1	0.0486611
chr1	1227507	1227516	5	0.3914	0.5598	-0.1684	0.003	0.023	0.0191201
chr1	1233888	1233948	5	0.4658	0.57033	-0.104533	0.4	0.65	0.402702
chr1	1289212	1289375	5	0.20027	0.30513	-0.104867	0.25	0.63	0.262712
chr1	1290776	1290818	5	0.54413	0.4282	0.115933	0.19	0.25	0.210824
chr1	1309845	1309860	5	0.576	0.439	0.137	0.0045	0.0037	0.0238952
chr1	1368695	1368720	5	0.52493	0.64133	-0.1164	0.18	0.25	0.20362
chr1	1389659	1389739	5	0.8366	0.93927	-0.102667	0.026	0.066	0.0614142
chr1	1397823	1397928	5	0.64067	0.77207	-0.1314	0.16	0.35	0.184744
chr1	1398075	1398152	5	0.82507	0.70187	0.1232	0.071	0.35	0.109797
chr1	1411989	1412049	5	0.64127	0.7628	-0.121533	0.15	0.48	0.177332
chr1	1440930	1441047	8	0.17325	0.33096	-0.157708	0.00019	0.0027	0.0032905
chr1	1471312	1471341	5	0.72847	0.8414	-0.112933	0.18	0.26	0.20362
chr1	1485079	1485150	5	0.5594	0.73967	-0.180267	0.0035	0.0069	0.0209136
chr1	1492770	1492990	5	0.8482	0.95313	-0.104933	0.0095	0.066	0.035697
chr1	1625349	1625375	5	0.4162	0.28827	0.127933	0.21	0.48	0.229403
chr1	1796821	1796949	5	0.86333	0.97227	-0.108933	0.0051	0.023	0.0255577
chr1	1849250	1849674	21	0.84203	0.90994	-0.104429	0.064	0.1	0.104005
chr1	1850206	1850218	5	0.76813	0.9262	-0.158067	0.0075	0.0071	0.0313342
chr1	1850299	1850317	5	0.19607	0.31967	-0.1236	0.11	0.25	0.144028
chr1	1872326	1872368	5	0.44833	0.60747	-0.159133	0.036	0.11	0.0735275
chr1	1886690	1886742	5	0.79373	0.89693	-0.1032	0.029	0.24	0.0650695
chr1	1889205	1889300	6	0.60183	0.73439	-0.132556	0.043	0.088	0.0829482
chr1	1912713	1912756	5	0.54687	0.68393	-0.137067	0.078	0.25	0.116508
chr1	1916718	1916817	5	0.8484	0.95593	-0.107533	0.1	0.16	0.134759
chr1	1946667	1946720	5	0.2198	0.34267	-0.122867	0.015	0.066	0.0452071
chr1	1950979	1950998	5	0.63927	0.79053	-0.151267	0.026	0.065	0.0614142
chr1	1953907	1953938	5	0.5056	0.65593	-0.150333	0.033	0.0076	0.0706102
chr1	1955114	1955268	5	0.74573	0.60187	0.143867	0.0026	0.023	0.0176522
chr1	1961680	1961705	5	0.8562	0.70213	0.154067	0.065	0.35	0.104005
chr1	1967727	1967826	5	0.30987	0.45047	-0.1406	0.25	0.36	0.262712
chr1	1992787	1993095	11	0.73567	0.62748	0.108182	0.062	0.058	0.102616
chr1	2013480	2013714	30	0.54516	0.42802	0.117133	0.0026	0.011	0.0176522
chr1	2013918	2014045	18	0.37863	0.43643	-0.124556	0.0029	0.036	0.0191201
chr1	2121732	2121802	5	0.66147	0.824	-0.162533	0.049	0.068	0.088355
chr1	2124328	2124392	5	0.64987	0.54967	0.1002	0.4	0.64	0.402702
chr1	2130731	2130808	5	0.75867	0.64427	0.1144	0.0039	0.013	0.0220782
chr1	2246841	2246901	5	0.20647	0.33253	-0.126067	0.11	0.065	0.144028
chr1	2260897	2261084	5	0.81453	0.92047	-0.105933	0.24	0.64	0.255127
chr1	2263665	2263816	5	0.45307	0.6446	-0.191533	0.093	0.24	0.12948
chr1	2270761	2270893	8	0.83483	0.67529	0.159542	0.035	0.058	0.0735275
chr1	2288030	2288687	34	0.79012	0.81451	-0.115167	0.046	0.13	0.0862257
chr1	2304210	2304265	7	0.69933	0.80086	-0.101524	0.015	0.15	0.0452071
chr1	2347486	2347514	5	0.49213	0.657	-0.164867	0.071	0.35	0.109797
chr1	2365498	2365511	5	0.50947	0.67287	-0.1634	0.0023	0.0019	0.0166979
chr1	2372143	2372336	14	0.51171	0.6219	-0.11019	0.013	0.035	0.0429546
chr1	2375009	2375136	5	0.6288	0.5266	0.1022	0.21	0.36	0.229403
chr1	2375163	2375173	5	0.39133	0.2522	0.139133	0.059	0.16	0.0979646
chr1	2375344	2375374	5	0.61547	0.7524	-0.136933	0.24	0.64	0.255127
chr1	2381538	2381620	5	0.64147	0.5388	0.102667	0.31	0.91	0.317078
chr1	2384656	2385903	42	0.54959	0.55151	0.105778	0.062	0.022	0.102616
chr1	2386632	2386697	7	0.33914	0.20005	0.139095	0.0086	0.048	0.0341182
chr1	2387390	2387681	7	0.23362	0.39548	-0.161857	0.031	0.02	0.0688593
chr1	2387835	2387849	5	0.38773	0.508	-0.120267	0.049	0.16	0.088355
chr1	2388939	2388991	5	0.53027	0.71047	-0.1802	0.00098	0.0071	0.010093
chr1	2388994	2390411	61	0.44547	0.45712	-0.113056	0.076	0.13	0.116508
chr1	2391227	2391241	5	0.59173	0.765	-0.173267	0.017	0.04	0.0486611
chr1	2392867	2392962	5	0.4264	0.53933	-0.112933	0.054	0.11	0.0931656
chr1	2396346	2396597	5	0.43073	0.31693	0.1138	0.25	0.35	0.262712
chr1	2410884	2410976	5	0.1774	0.2956	-0.1182	0.054	0.067	0.0931656
chr1	2433158	2433436	5	0.74033	0.85973	-0.1194	0.078	0.067	0.116508
chr1	2436133	2437158	57	0.70788	0.70607	-0.106286	0.21	0.61	0.229403
chr1	2480125	2480170	5	0.26273	0.40707	-0.144333	0.22	0.64	0.237283
chr1	2488454	2488841	5	0.19273	0.32633	-0.1336	0.026	0.065	0.0614142
chr1	2494730	2494752	5	0.71367	0.61347	0.1002	0.11	0.49	0.144028
chr1	2499264	2499344	5	0.29007	0.40127	-0.1112	0.054	0.17	0.0931656
chr1	2500798	2500937	7	0.59667	0.4839	0.112762	0.14	0.28	0.169624
chr1	2507257	2507360	5	0.61873	0.5158	0.102933	0.033	0.013	0.0706102
chr1	2524242	2524308	5	0.66773	0.50533	0.1624	0.002	0.0018	0.0153923
chr1	2529224	2529287	5	0.63873	0.52867	0.110067	0.16	0.63	0.184744
chr1	2536695	2536943	7	0.26581	0.39757	-0.131762	0.12	0.21	0.15276
chr1	2540990	2541056	5	0.7714	0.64373	0.127667	0.026	0.039	0.0614142
chr1	2575043	2575104	5	0.41387	0.31133	0.102533	0.19	0.36	0.210824
chr1	2575601	2575873	12	0.39433	0.292	0.102333	0.03	0.14	0.0669836
chr1	2575908	2575984	5	0.54267	0.65247	-0.1098	0.29	0.65	0.298711
chr1	2706007	2706027	5	0.35427	0.53187	-0.1776	0.014	0.067	0.044522
chr1	2706490	2706500	5	0.66333	0.78447	-0.121133	0.19	0.63	0.210824
chr1	2706854	2707116	23	0.57219	0.50555	0.130056	0.066	0.19	0.105399
chr1	2717190	2717222	5	0.22713	0.11547	0.111667	0.0095	0.07	0.035697
chr1	2724788	2724827	5	0.4714	0.30713	0.164267	0.033	0.16	0.0706102
chr1	2725868	2726007	7	0.32367	0.43629	-0.112619	0.17	0.38	0.195911
chr1	2739578	2739643	5	0.16733	0.2906	-0.123267	0.054	0.11	0.0931656
chr1	2749838	2749860	5	0.84673	0.67887	0.167867	0.014	0.066	0.044522
chr1	2775309	2775387	7	0.5889	0.44824	0.140667	0.1	0.37	0.134759
chr1	2792739	2792757	8	0.38883	0.26192	0.126917	3.7e-05	0.00027	0.000914673
chr1	2797601	2797678	5	0.43993	0.33367	0.106267	0.27	0.49	0.280797
chr1	2831572	2831680	5	0.2178	0.11233	0.105467	0.078	0.066	0.116508
chr1	2846905	2846938	5	0.456	0.3004	0.1556	0.015	0.066	0.0452071
chr1	2863745	2863819	5	0.1652	0.0648	0.1004	0.049	0.16	0.088355
chr1	2931496	2931558	5	0.15667	0.35453	-0.197867	0.0026	0.013	0.0176522
chr1	2938260	2938280	5	0.73093	0.85787	-0.126933	0.0051	0.024	0.0255577
chr1	2979977	2980010	5	0.40887	0.52087	-0.112	0.0026	0.0069	0.0176522
chr1	2980708	2980741	5	0.20313	0.3262	-0.123067	0.003	0.0069	0.0191201
chr1	2986268	2986440	5	0.6054	0.71633	-0.110933	0.19	0.65	0.210824
chr1	2987080	2987116	5	0.39853	0.54813	-0.1496	0.093	0.16	0.12948
chr1	2990452	2990466	5	0.82667	0.72327	0.1034	0.14	0.24	0.169624
chr1	2990535	2990543	5	0.8776	0.7714	0.1062	0.033	0.11	0.0706102
chr1	3034064	3034102	5	0.12807	0.24507	-0.117	0.0045	0.013	0.0238952
chr1	3036916	3036992	5	0.22867	0.34767	-0.119	0.31	0.64	0.317078
chr1	3051131	3051198	5	0.7614	0.62413	0.137267	0.021	0.023	0.0544314
chr1	3052344	3052388	9	0.36352	0.48467	-0.121148	0.015	0.048	0.0452071
chr1	3055824	3055871	5	0.51753	0.65367	-0.136133	0.085	0.16	0.122672
chr1	3056630	3056666	5	0.31133	0.21013	0.1012	0.14	0.16	0.169624
chr1	3076368	3076551	5	0.455	0.55773	-0.102733	0.15	0.17	0.177332
chr1	3079095	3079205	5	0.18647	0.3122	-0.125733	0.22	0.64	0.237283
chr1	3081254	3081574	21	0.49919	0.51943	0.115278	0.28	0.49	0.291041
chr1	3083568	3083704	5	0.52287	0.6232	-0.100333	0.15	0.48	0.177332
chr1	3100126	3100143	5	0.574	0.70927	-0.135267	0.04	0.16	0.0784711
chr1	3111667	3111724	5	0.3392	0.2236	0.1156	0.036	0.11	0.0735275
chr1	3124264	3124715	19	0.51119	0.44805	0.1112	0.16	0.65	0.184744
chr1	3144214	3144281	5	0.49513	0.6012	-0.106067	0.14	0.072	0.169624
chr1	3147309	3147360	5	0.43653	0.59747	-0.160933	0.019	0.067	0.0517666
chr1	3155160	3155185	6	0.70872	0.82822	-0.1195	0.037	0.13	0.0753812
chr1	3157509	3157566	15	0.58133	0.68629	-0.104956	0.019	0.029	0.0517666
chr1	3157732	3157756	5	0.55993	0.66407	-0.104133	0.18	0.63	0.20362
chr1	3184703	3184749	7	0.39038	0.27452	0.115857	0.058	0.048	0.0979646
chr1	3193515	3193533	5	0.1706	0.38367	-0.213067	0.0015	0.007	0.012931
chr1	3199611	3199671	7	0.71614	0.57986	0.136286	0.11	0.28	0.144028
chr1	3225056	3225106	5	0.33607	0.22773	0.108333	0.029	0.04	0.0650695
chr1	3265940	3265958	5	0.3748	0.57787	-0.203067	6.3e-05	0.0036	0.00140504
chr1	3271644	3271738	5	0.58833	0.72007	-0.131733	0.071	0.16	0.109797
chr1	3294344	3294412	5	0.50933	0.38267	0.126667	0.085	0.11	0.122672
chr1	3301602	3301700	5	0.53193	0.64367	-0.111733	0.059	0.026	0.0979646
chr1	3306753	3306928	5	0.45967	0.35753	0.102133	0.27	0.64	0.280797
chr1	3321856	3322014	5	0.63247	0.46893	0.163533	0.036	0.16	0.0735275
chr1	3340358	3340478	5	0.6768	0.57067	0.106133	0.29	0.65	0.298711
chr1	3340514	3340587	5	0.43667	0.54893	-0.112267	0.33	0.49	0.335586
chr1	3380259	3380336	5	0.94987	0.83213	0.117733	0.0039	0.039	0.0220782
chr1	3414796	3414935	5	0.7644	0.8664	-0.102	0.085	0.36	0.122672
chr1	3418409	3418470	5	0.78147	0.66713	0.114333	0.19	0.16	0.210824
chr1	3470184	3470320	5	0.53287	0.4126	0.120267	0.15	0.36	0.177332
chr1	3485668	3485726	7	0.73819	0.88095	-0.142762	0.0059	0.071	0.0279749
chr1	3495717	3495839	13	0.43967	0.54721	-0.107538	0.052	0.22	0.0931656
chr1	3514764	3514919	5	0.7192	0.84873	-0.129533	0.059	0.35	0.0979646
chr1	3527898	3527937	5	0.84527	0.72167	0.1236	0.078	0.35	0.116508
chr1	3568609	3568649	5	0.6572	0.8098	-0.1526	0.04	0.067	0.0784711
chr1	3633797	3633928	5	0.61267	0.79807	-0.1854	0.0051	0.039	0.0255577
chr1	3634704	3634785	5	0.75313	0.85687	-0.103733	0.14	0.25	0.169624
chr1	3644669	3644734	5	0.54993	0.67613	-0.1262	0.065	0.023	0.104005
chr1	3646398	3646518	10	0.47397	0.37313	0.100833	0.041	0.065	0.0803312
chr1	3651349	3651377	5	0.80487	0.90547	-0.1006	0.014	0.067	0.044522
chr1	3663611	3663833	15	0.42073	0.28447	0.136267	0.013	0.0039	0.0429546
chr1	3669317	3669375	5	0.63493	0.74667	-0.111733	0.22	0.36	0.237283
chr1	3669392	3669593	5	0.6096	0.71647	-0.106867	0.18	0.25	0.20362
chr1	3669781	3669814	5	0.4724	0.3242	0.1482	0.0011	0.0037	0.0106429
chr1	3672123	3672181	5	0.526	0.62853	-0.102533	0.27	0.64	0.280797
chr1	3678413	3678520	5	0.40947	0.5994	-0.189933	0.033	0.043	0.0706102
chr1	3688531	3688580	9	0.47237	0.35256	0.119815	0.021	0.094	0.0544314
chr1	3688583	3688613	5	0.145	0.26613	-0.121133	0.036	0.11	0.0735275
chr1	3830649	3830799	8	0.64312	0.53117	0.111958	0.01	0.018	0.0372596
chr1	4187695	4187713	5	0.20047	0.30367	-0.1032	0.011	0.023	0.0386271
chr1	4329526	4329571	5	0.62867	0.49687	0.1318	0.093	0.16	0.12948
chr1	4471761	4472087	5	0.53007	0.6888	-0.158733	0.15	0.1	0.177332
chr1	4576208	4576257	5	0.411	0.2848	0.1262	0.078	0.17	0.116508
chr1	4656751	4656795	5	0.092267	0.2058	-0.113533	0.044	0.023	0.0829482
chr1	4660439	4660466	7	0.53533	0.43157	0.103762	0.09	0.14	0.129167
chr1	4688496	4688546	5	0.2898	0.43053	-0.140733	0.019	0.1	0.0517666
chr1	4696928	4697000	5	0.5984	0.78733	-0.188933	0.0058	0.039	0.027636
chr1	4715942	4716013	5	0.7772	0.92727	-0.150067	0.044	0.17	0.0829482
chr1	4718554	4718574	5	0.7508	0.86733	-0.116533	0.059	0.24	0.0979646
chr1	4736244	4736284	5	0.5226	0.62953	-0.106933	0.11	0.37	0.144028
chr1	4749889	4749902	5	0.77993	0.6726	0.107333	0.065	0.11	0.104005
chr1	4772067	4772321	5	0.4576	0.2762	0.1814	0.04	0.11	0.0784711
chr1	4772366	4772527	5	0.29553	0.4168	-0.121267	0.27	0.92	0.280797
chr1	4772564	4772605	5	0.34013	0.48993	-0.1498	0.059	0.16	0.0979646
chr1	4838939	4838960	5	0.2018	0.3274	-0.1256	1.5e-05	1.5e-05	0.000432156
chr1	5532174	5532203	5	0.34387	0.46827	-0.1244	0.024	0.16	0.0590008
chr1	5816701	5816717	5	0.37147	0.52267	-0.1512	0.085	0.17	0.122672
chr1	5897958	5897989	5	0.69953	0.82327	-0.123733	0.049	0.065	0.088355
chr1	5901915	5901948	5	0.45273	0.58713	-0.1344	0.14	0.35	0.169624
chr1	5918896	5918966	5	0.79367	0.93967	-0.146	0.012	0.069	0.0399656
chr1	6051294	6051456	5	0.51827	0.64067	-0.1224	0.18	0.5	0.20362
chr1	6193780	6194114	7	0.77776	0.67319	0.104571	0.18	0.21	0.20362
chr1	6217589	6217673	5	0.39113	0.5176	-0.126467	0.14	0.16	0.169624
chr1	6218792	6218874	7	0.48429	0.5999	-0.115619	0.094	0.21	0.130485
chr1	6226807	6226968	5	0.6276	0.51767	0.109933	0.24	0.64	0.255127
chr1	6239363	6239447	8	0.76967	0.63246	0.137208	0.0057	0.011	0.027636
chr1	6318435	6318481	5	0.0764	0.23353	-0.157133	0.0013	0.0036	0.0117219
chr1	6438361	6438433	8	0.44092	0.56292	-0.122	0.055	0.11	0.0947643
chr1	6445804	6446024	5	0.2462	0.14067	0.105533	0.093	0.17	0.12948
chr1	6464593	6464684	5	0.60973	0.498	0.111733	0.27	0.64	0.280797
chr1	6465037	6465309	5	0.68627	0.54647	0.1398	0.1	0.07	0.134759
chr1	6470311	6470328	5	0.5972	0.46787	0.129333	0.12	0.35	0.15276
chr1	6479352	6479387	5	0.5986	0.70013	-0.101533	0.14	0.48	0.169624
chr1	6480211	6480241	5	0.12347	0.25367	-0.1302	0.0023	0.007	0.0166979
chr1	6480515	6480553	5	0.63813	0.8052	-0.167067	0.054	0.25	0.0931656
chr1	6500747	6500876	17	0.3528	0.67488	-0.322078	4.4e-14	2.8e-15	1.03333e-11
chr1	6507746	6507952	5	0.75273	0.87133	-0.1186	0.065	0.25	0.104005
chr1	6508332	6508344	5	0.8284	0.93693	-0.108533	0.012	0.023	0.0399656
chr1	6508495	6508518	5	0.31473	0.45627	-0.141533	0.14	0.16	0.169624
chr1	6515624	6515670	5	0.916	0.76747	0.148533	0.0013	0.0037	0.0117219
chr1	6543143	6543504	6	0.7	0.53361	0.166389	0.04	0.022	0.0784711
chr1	6583507	6583564	5	0.78967	0.68293	0.106733	0.065	0.17	0.104005
chr1	6635020	6635051	5	0.64453	0.8212	-0.176667	0.012	0.014	0.0399656
chr1	6694862	6694915	5	0.4074	0.5222	-0.1148	0.16	0.64	0.184744
chr1	7022251	7022285	5	0.53827	0.71033	-0.172067	0.0084	0.023	0.0334963
chr1	7103707	7103932	5	0.79467	0.89493	-0.100267	0.059	0.1	0.0979646
chr1	7217947	7218144	18	0.87493	0.92161	-0.10381	0.012	0.21	0.0399656
chr1	7242194	7242508	5	0.7926	0.68533	0.107267	0.059	0.16	0.0979646
chr1	7709168	7709235	5	0.59913	0.70187	-0.102733	0.065	0.11	0.104005
chr1	7740383	7740492	23	0.41674	0.52809	-0.121818	0.017	0.059	0.0486611
chr1	7740951	7740969	5	0.48267	0.63193	-0.149267	0.16	0.065	0.184744
chr1	7740972	7740990	5	0.45747	0.56173	-0.104267	0.049	0.35	0.088355
chr1	7740991	7741016	6	0.47322	0.61433	-0.141111	0.094	0.19	0.130485
chr1	7741021	7741033	5	0.40987	0.59567	-0.1858	0.021	0.024	0.0544314
chr1	7765164	7765204	7	0.51038	0.76695	-0.256571	0.0015	0.0077	0.012931
chr1	7788381	7788435	5	0.72647	0.83713	-0.110667	0.085	0.24	0.122672
chr1	7825943	7826003	5	0.91313	0.8086	0.104533	0.0017	0.00042	0.0137097
chr1	7844799	7844825	5	0.5626	0.4054	0.1572	0.1	0.16	0.134759
chr1	8384659	8384693	5	0.8782	0.76673	0.111467	0.085	0.35	0.122672
chr1	8386016	8386048	5	0.69807	0.799	-0.100933	0.054	0.17	0.0931656
chr1	8400056	8400143	5	0.69353	0.79793	-0.1044	0.1	0.35	0.134759
chr1	8560693	8560788	5	0.7936	0.9436	-0.15	0.0023	0.0069	0.0166979
chr1	9144674	9145035	5	0.52293	0.64553	-0.1226	0.15	0.64	0.177332
chr1	9242124	9242526	25	0.23784	0.56031	-0.322467	4.6e-14	2.6e-21	1.03333e-11
chr1	9242646	9242873	17	0.36018	0.35896	-0.100067	0.12	0.1	0.15276
chr1	9464218	9464263	5	0.91227	0.79747	0.1148	0.25	0.16	0.262712
chr1	9532740	9532758	5	0.4878	0.60393	-0.116133	0.033	0.067	0.0706102
chr1	9673373	9673510	5	0.81687	0.70927	0.1076	0.015	0.066	0.0452071
chr1	9749925	9750301	31	0.30166	0.47138	-0.16972	1.1e-10	2.1e-07	1.02711e-08
chr1	9859420	9859428	5	0.17693	0.35953	-0.1826	3.1e-05	0.0002	0.000785131
chr1	9931818	9931923	5	0.72853	0.83407	-0.105533	0.29	0.63	0.298711
chr1	10022840	10022941	5	0.66313	0.5542	0.108933	0.25	0.64	0.262712
chr1	10695746	10695761	5	0.42227	0.56747	-0.1452	0.054	0.066	0.0931656
chr1	10726111	10726225	5	0.5462	0.6884	-0.1422	0.1	0.17	0.134759
chr1	10785281	10785378	8	0.58775	0.7215	-0.13375	0.00026	0.0044	0.00413333
chr1	10788014	10788077	7	0.66948	0.77343	-0.103952	0.2	0.15	0.221571
chr1	10854328	10854417	10	0.3884	0.27537	0.113033	0.00012	0.013	0.00229913
chr1	10854568	10854752	5	0.51613	0.6242	-0.108067	0.22	0.36	0.237283
chr1	10888102	10888404	7	0.77381	0.90967	-0.135857	0.13	0.21	0.161045
chr1	10989942	10989984	5	0.62627	0.72967	-0.1034	0.22	0.35	0.237283
chr1	11113079	11113138	5	0.78307	0.66327	0.1198	0.14	0.35	0.169624
chr1	11245859	11245910	5	0.76787	0.86913	-0.101267	0.059	0.36	0.0979646
chr1	11387906	11388367	7	0.70905	0.84267	-0.133619	0.024	0.049	0.0590008
chr1	11394164	11394196	5	0.76093	0.87093	-0.11	0.017	0.065	0.0486611
chr1	11413833	11414284	7	0.42143	0.52614	-0.104714	0.08	0.28	0.119116
chr1	11435741	11435914	5	0.35467	0.2496	0.105067	0.18	0.36	0.20362
chr1	11442714	11442807	5	0.4282	0.2514	0.1768	0.27	0.17	0.280797
chr1	11459301	11459417	5	0.1846	0.3472	-0.1626	0.015	0.11	0.0452071
chr1	11484102	11484331	5	0.44133	0.33593	0.1054	0.093	0.35	0.12948
chr1	11490336	11490581	5	0.4246	0.32293	0.101667	0.29	0.35	0.298711
chr1	11609931	11609941	5	0.14427	0.24893	-0.104667	0.011	0.014	0.0386271
chr1	11714042	11714234	5	0.732	0.89687	-0.164867	0.049	0.16	0.088355
chr1	11721216	11721284	5	0.85473	0.95553	-0.1008	0.04	0.17	0.0784711
chr1	11826658	11826666	5	0.8462	0.7282	0.118	0.017	0.013	0.0486611
chr1	11942237	11942298	5	0.26967	0.15767	0.112	0.093	0.16	0.12948
chr1	11950531	11950566	5	0.1638	0.3344	-0.1706	0.0051	0.0037	0.0255577
chr1	11958946	11958987	5	0.4752	0.5882	-0.113	0.18	0.37	0.20362
chr1	11961977	11962039	5	0.79427	0.89913	-0.104867	0.0023	0.013	0.0166979
chr1	11985618	11985747	13	0.80528	0.9651	-0.159821	9e-07	6.3e-06	3.73995e-05
chr1	12538913	12538943	5	0.74833	0.85747	-0.109133	0.036	0.11	0.0735275
chr1	12655689	12655737	6	0.29156	0.42572	-0.134167	0.019	0.057	0.0517666
chr1	12924652	12924721	5	0.267	0.15707	0.109933	0.0058	0.066	0.027636
chr1	13340558	13340597	5	0.6532	0.80487	-0.151667	0.0075	0.024	0.0313342
chr1	13633985	13634092	5	0.22733	0.3284	-0.101067	0.085	0.1	0.122672
chr1	13700002	13700041	5	0.1402	0.32053	-0.180333	0.00072	0.0019	0.00827279
chr1	13752046	13752305	5	0.8796	0.73927	0.140333	0.00062	8.5e-05	0.00756693
chr1	13840552	13840675	10	0.72187	0.88037	-0.1585	0.0006	0.012	0.00753036
chr1	13840683	13840799	5	0.53973	0.64353	-0.1038	0.16	0.35	0.184744
chr1	13999782	13999845	8	0.72912	0.85762	-0.1285	0.0014	0.0045	0.0124856
chr1	14137404	14137508	5	0.76987	0.89613	-0.126267	0.036	0.04	0.0735275
chr1	14219581	14219587	5	0.8566	0.95853	-0.101933	0.021	0.065	0.0544314
chr1	14228196	14228500	5	0.31453	0.42727	-0.112733	0.33	0.92	0.335586
chr1	15127588	15129160	47	0.8424	0.82094	0.102444	0.076	0.13	0.116508
chr1	15190798	15190836	5	0.58147	0.71933	-0.137867	0.029	0.17	0.0650695
chr1	15417010	15417079	5	0.55033	0.65767	-0.107333	0.1	0.16	0.134759
chr1	15447268	15447569	5	0.51267	0.61493	-0.102267	0.4	0.25	0.402702
chr1	15568451	15568557	10	0.84757	0.96307	-0.1155	0.00016	0.00035	0.0029108
chr1	15649570	15649934	7	0.3469	0.15795	0.188952	0.023	0.072	0.0590008
chr1	15753622	15753662	5	0.49	0.36373	0.126267	0.0084	0.0071	0.0334963
chr1	16061064	16061428	7	0.853	0.96824	-0.115238	0.011	0.02	0.0386271
chr1	16063107	16063173	5	0.96667	0.81687	0.1498	0.019	0.066	0.0517666
chr1	16088902	16089175	5	0.7092	0.59087	0.118333	0.27	0.92	0.280797
chr1	16107720	16107778	5	0.6136	0.76307	-0.149467	0.04	0.041	0.0784711
chr1	16163528	16163591	5	0.85547	0.97127	-0.1158	0.13	0.35	0.161045
chr1	16329868	16330108	5	0.705	0.80733	-0.102333	0.19	0.36	0.210824
chr1	16467374	16467387	5	0.59153	0.7194	-0.127867	0.036	0.067	0.0735275
chr1	16489002	16489062	7	0.58676	0.6901	-0.103333	0.1	0.49	0.134759
chr1	16509408	16509543	5	0.5142	0.645	-0.1308	0.21	0.35	0.229403
chr1	16509852	16509963	8	0.49225	0.34467	0.147583	0.0023	0.011	0.0166979
chr1	16542100	16542191	6	0.84383	0.95156	-0.107722	0.00031	0.0077	0.00462464
chr1	16939458	16939465	5	0.41153	0.51187	-0.100333	0.00098	0.0038	0.010093
chr1	16984929	16984988	5	0.8476	0.73387	0.113733	0.085	0.35	0.122672
chr1	17021810	17021834	5	0.67727	0.78727	-0.11	0.47	0.48	0.471003
chr1	17215536	17215787	7	0.96143	0.8581	0.103333	0.0029	0.0077	0.0191201
chr1	17306650	17306736	11	0.60785	0.71994	-0.112091	1.5e-06	4.7e-06	5.99227e-05
chr1	17343277	17343299	5	0.40007	0.21047	0.1896	0.002	0.013	0.0153923
chr1	17574424	17574484	5	0.6816	0.8446	-0.163	0.059	0.35	0.0979646
chr1	17714942	17714997	5	0.57567	0.45293	0.122733	0.085	0.25	0.122672
chr1	17790985	17791044	7	0.67843	0.79948	-0.121048	0.04	0.11	0.0784711
chr1	17834339	17834553	5	0.86387	0.73247	0.1314	0.021	0.1	0.0544314
chr1	18145898	18146073	11	0.76506	0.6637	0.101364	0.0078	0.03	0.0324738
chr1	18149644	18149774	5	0.75907	0.87653	-0.117467	0.078	0.16	0.116508
chr1	18152557	18152640	5	0.5908	0.69667	-0.105867	0.11	0.16	0.144028
chr1	18221158	18221179	5	0.7448	0.6064	0.1384	0.029	0.039	0.0650695
chr1	18434378	18434415	7	0.39019	0.53324	-0.143048	0.12	0.29	0.15276
chr1	18475522	18475631	5	0.2396	0.35707	-0.117467	0.27	0.35	0.280797
chr1	18809742	18809852	5	0.41813	0.58107	-0.162933	0.059	0.16	0.0979646
chr1	18966976	18967040	5	0.345	0.475	-0.13	0.14	0.24	0.169624
chr1	19010190	19010226	5	0.46053	0.5858	-0.125267	0.24	0.17	0.255127
chr1	19040625	19040872	10	0.74453	0.6184	0.126133	0.028	0.23	0.0650695
chr1	19144446	19144488	5	0.59373	0.71767	-0.123933	0.024	0.11	0.0590008
chr1	19181059	19181075	5	0.5362	0.4358	0.1004	0.085	0.24	0.122672
chr1	19181273	19181279	5	0.54727	0.6966	-0.149333	0.0045	0.0069	0.0238952
chr1	19215877	19215927	5	0.9294	0.82847	0.100933	0.021	0.11	0.0544314
chr1	19276086	19276236	10	0.1837	0.2873	-0.1036	0.013	0.18	0.0429546
chr1	19282165	19282228	11	0.38939	0.52367	-0.134273	0.0027	0.015	0.0182831
chr1	19600292	19600324	5	0.74793	0.87153	-0.1236	0.078	0.17	0.116508
chr1	19887622	19887667	5	0.91047	0.7838	0.126667	0.019	0.065	0.0517666
chr1	19971331	19971381	7	0.52457	0.37243	0.152143	0.09	0.11	0.129167
chr1	19987712	19987776	5	0.050867	0.21933	-0.168467	0.026	0.066	0.0614142
chr1	19991344	19991358	5	0.59547	0.6972	-0.101733	0.33	0.63	0.335586
chr1	19991505	19991548	5	0.4502	0.31367	0.136533	0.13	0.17	0.161045
chr1	20005806	20005854	13	0.33579	0.48015	-0.144359	0.0098	0.026	0.0367708
chr1	20139612	20139688	5	0.712	0.82347	-0.111467	0.024	0.04	0.0590008
chr1	20480010	20480124	5	0.2794	0.1744	0.105	0.19	0.49	0.210824
chr1	20480970	20481079	5	0.486	0.59767	-0.111667	0.22	0.35	0.237283
chr1	20491303	20491323	5	0.8232	0.70373	0.119467	0.002	0.0037	0.0153923
chr1	20661024	20661229	17	0.10918	0.15018	-0.106056	0.0086	0.088	0.0341182
chr1	21044204	21044221	5	0.29193	0.14553	0.1464	0.04	0.24	0.0784711
chr1	21044654	21044709	7	0.21705	0.099619	0.117429	0.026	0.21	0.0614142
chr1	21627708	21627758	5	0.801	0.67287	0.128133	0.026	0.04	0.0614142
chr1	21660861	21661046	5	0.31547	0.14347	0.172	0.0015	0.023	0.012931
chr1	21766984	21767119	22	0.41638	0.6158	-0.199424	4.3e-12	8e-11	5.28968e-10
chr1	21767126	21767173	5	0.4184	0.54747	-0.129067	0.014	0.013	0.044522
chr1	21767186	21767222	5	0.47033	0.69453	-0.2242	0.00098	0.0018	0.010093
chr1	21835518	21835589	5	0.041133	0.1812	-0.140067	0.00024	0.00019	0.003875
chr1	21864864	21865010	18	0.44378	0.72833	-0.284556	4.4e-13	2.2e-07	6.75248e-11
chr1	21869942	21870230	7	0.31357	0.43971	-0.126143	0.026	0.0077	0.0614142
chr1	21949190	21949311	17	0.4169	0.5418	-0.124902	8.2e-10	4.9e-09	6.48469e-08
chr1	22257893	22257961	5	0.47933	0.62187	-0.142533	0.029	0.023	0.0650695
chr1	22480831	22481065	5	0.63407	0.7426	-0.108533	0.059	0.1	0.0979646
chr1	22486580	22486626	7	0.83929	0.94671	-0.107429	0.0013	0.0077	0.0117219
chr1	22534424	22534498	5	0.39273	0.50733	-0.1146	0.026	0.066	0.0614142
chr1	22539223	22539303	7	0.24348	0.34629	-0.10281	0.0026	0.032	0.0176522
chr1	22586240	22586260	5	0.20907	0.3138	-0.104733	0.22	0.48	0.237283
chr1	22642312	22642395	5	0.352	0.47993	-0.127933	0.033	0.17	0.0706102
chr1	22647911	22648019	5	0.44333	0.55813	-0.1148	0.24	0.64	0.255127
chr1	22670737	22670824	5	0.24167	0.3742	-0.132533	0.054	0.11	0.0931656
chr1	22705840	22706103	5	0.44893	0.60113	-0.1522	0.093	0.35	0.12948
chr1	22716934	22717097	5	0.592	0.73353	-0.141533	0.015	0.065	0.0452071
chr1	22890233	22890266	5	0.72813	0.582	0.146133	0.054	0.17	0.0931656
chr1	22892997	22893109	5	0.35253	0.4564	-0.103867	0.29	0.36	0.298711
chr1	22903538	22903623	5	0.22927	0.3536	-0.124333	0.25	0.64	0.262712
chr1	22915668	22915722	5	0.44833	0.56573	-0.1174	0.16	0.35	0.184744
chr1	22924259	22924288	5	0.622	0.4982	0.1238	0.16	0.16	0.184744
chr1	22924334	22924351	5	0.4948	0.30767	0.187133	0.024	0.16	0.0590008
chr1	22925447	22925519	5	0.30453	0.1788	0.125733	0.16	0.36	0.184744
chr1	22987543	22987637	5	0.7246	0.48113	0.243467	0.003	0.0037	0.0191201
chr1	23084503	23084560	5	0.78813	0.61213	0.176	0.036	0.17	0.0735275
chr1	23139795	23140203	5	0.71313	0.81467	-0.101533	0.078	0.1	0.116508
chr1	23243136	23243284	5	0.58193	0.69207	-0.110133	0.19	0.35	0.210824
chr1	23567027	23567121	14	0.77314	0.60193	0.171214	0.00037	0.0013	0.0052663
chr1	23662348	23662418	7	0.65905	0.8221	-0.163048	0.0034	0.013	0.0209136
chr1	23662829	23663044	5	0.61907	0.7496	-0.130533	0.065	0.042	0.104005
chr1	23750835	23750870	5	0.48107	0.37907	0.102	0.4	0.63	0.402702
chr1	23750878	23750953	5	0.2168	0.0588	0.158	0.024	0.066	0.0590008
chr1	23750956	23750983	5	0.2698	0.033267	0.236533	0.00012	0.00042	0.00229913
chr1	23751145	23751221	11	0.39221	0.62321	-0.231	8.2e-07	1.5e-05	3.44444e-05
chr1	23862715	23862803	5	0.66567	0.76893	-0.103267	0.33	0.35	0.335586
chr1	23894345	23894465	5	0.76147	0.8648	-0.103333	0.021	0.065	0.0544314
chr1	23894504	23894560	5	0.64147	0.75787	-0.1164	0.044	0.007	0.0829482
chr1	23894567	23894591	5	0.63767	0.75907	-0.1214	0.024	0.0037	0.0590008
chr1	23894856	23894915	8	0.58529	0.84796	-0.262667	6.9e-09	1.2e-08	4.65e-07
chr1	24194493	24194520	5	0.13487	0.24167	-0.1068	0.24	0.35	0.255127
chr1	24423804	24423967	5	0.73707	0.841	-0.103933	0.11	0.48	0.144028
chr1	24509132	24509324	5	0.54167	0.6444	-0.102733	0.25	0.25	0.262712
chr1	24648733	24648765	5	0.76767	0.6002	0.167467	0.0084	0.1	0.0334963
chr1	25013011	25013106	5	0.8148	0.93153	-0.116733	0.0075	0.013	0.0313342
chr1	25073893	25074248	8	0.74654	0.85446	-0.107917	0.0047	0.01	0.0247789
chr1	25247983	25248339	7	0.5631	0.71805	-0.154952	0.054	0.15	0.0931656
chr1	25250193	25250268	5	0.456	0.57733	-0.121333	0.093	0.17	0.12948
chr1	25269436	25269513	5	0.56753	0.68747	-0.119933	0.04	0.066	0.0784711
chr1	25658354	25658392	5	0.77453	0.8836	-0.109067	0.1	0.17	0.134759
chr1	25711177	25711218	5	0.69253	0.79793	-0.1054	0.16	0.17	0.184744
chr1	26084721	26085005	5	0.5328	0.6582	-0.1254	0.14	0.16	0.169624
chr1	26097972	26098011	5	0.83427	0.7158	0.118467	0.0035	0.013	0.0209136
chr1	26147811	26148027	5	0.72967	0.8306	-0.100933	0.25	0.36	0.262712
chr1	26338084	26338201	7	0.78843	0.90433	-0.115905	0.0012	0.0077	0.0114957
chr1	26498432	26498460	5	0.975	0.8748	0.1002	0.049	0.17	0.088355
chr1	26525563	26525756	5	0.70553	0.84113	-0.1356	0.0075	0.023	0.0313342
chr1	26614476	26614745	5	0.88087	0.98507	-0.1042	8.2e-06	1.5e-05	0.000259918
chr1	26662600	26662812	13	0.31313	0.23595	0.105458	0.061	0.083	0.101058
chr1	26723063	26723108	5	0.6614	0.8436	-0.1822	0.003	0.0019	0.0191201
chr1	26737377	26737433	5	0.71847	0.57133	0.147133	0.12	0.35	0.15276
chr1	26737822	26737837	5	0.3608	0.4936	-0.1328	0.18	0.64	0.20362
chr1	27019736	27019788	5	0.26253	0.083333	0.1792	0.0051	0.0018	0.0255577
chr1	27193307	27193322	5	0.8574	0.73553	0.121867	0.019	0.041	0.0517666
chr1	27195633	27195692	5	0.52833	0.42387	0.104467	0.24	0.16	0.255127
chr1	27286539	27286582	5	0.78073	0.8994	-0.118667	0.0039	0.0019	0.0220782
chr1	27308644	27308710	7	0.71343	0.82476	-0.111333	0.0068	0.031	0.0301401
chr1	27473396	27473447	5	0.9792	0.87227	0.106933	0.059	0.16	0.0979646
chr1	27503817	27503892	5	0.975	0.86287	0.112133	0.014	0.039	0.044522
chr1	27616152	27616224	5	0.6862	0.81807	-0.131867	0.021	0.023	0.0544314
chr1	27718276	27718422	5	0.41973	0.53107	-0.111333	0.13	0.36	0.161045
chr1	27804131	27804217	9	0.73152	0.84911	-0.117593	0.0061	0.029	0.0288087
chr1	27807253	27807296	5	0.66013	0.53793	0.1222	0.13	0.17	0.161045
chr1	27919448	27919624	5	0.65787	0.535	0.122867	0.15	0.16	0.177332
chr1	28272232	28272483	5	0.86587	0.76327	0.1026	0.11	0.16	0.144028
chr1	28428387	28428445	10	0.67477	0.57227	0.1025	0.1	0.29	0.134759
chr1	28572102	28572136	5	0.663	0.53047	0.132533	0.24	0.64	0.255127
chr1	28677937	28677950	5	0.60033	0.744	-0.143667	0.054	0.039	0.0931656
chr1	28771227	28771340	5	0.47827	0.36487	0.1134	0.085	0.1	0.122672
chr1	28806122	28806224	5	0.3316	0.46827	-0.136667	0.0075	0.065	0.0313342
chr1	28842084	28842349	7	0.31771	0.42695	-0.109238	0.12	0.15	0.15276
chr1	28920055	28920559	20	0.67338	0.712	-0.108	0.05	0.19	0.0899594
chr1	28989268	28989624	5	0.74607	0.9032	-0.157133	0.085	0.24	0.122672
chr1	29022398	29022445	5	0.6648	0.79427	-0.129467	0.19	0.065	0.210824
chr1	29138161	29138263	6	0.55178	0.65256	-0.100778	0.22	0.49	0.237283
chr1	29450875	29450904	5	0.2722	0.46787	-0.195667	0.00039	0.00042	0.00541182
chr1	29463752	29463813	5	0.5832	0.7268	-0.1436	0.012	0.039	0.0399656
chr1	29516779	29516804	5	0.83973	0.9398	-0.100067	0.093	0.24	0.12948
chr1	29777929	29777968	5	0.085667	0.20367	-0.118	0.044	0.042	0.0829482
chr1	30084954	30085082	5	0.26953	0.1584	0.111133	0.044	0.16	0.0829482
chr1	30404673	30404779	6	0.33928	0.44272	-0.103444	0.39	0.13	0.393657
chr1	30507400	30507474	7	0.22743	0.33476	-0.107333	0.0012	0.0077	0.0114957
chr1	30573503	30573764	9	0.65548	0.53819	0.117296	0.05	0.066	0.0899594
chr1	30759230	30759507	9	0.37593	0.49133	-0.115407	0.099	0.12	0.134759
chr1	30851937	30852021	5	0.49473	0.60293	-0.1082	0.21	0.35	0.229403
chr1	31712045	31712089	7	0.65205	0.76552	-0.113476	0.0092	0.02	0.035697
chr1	32149773	32150002	5	0.75573	0.88033	-0.1246	0.093	0.35	0.12948
chr1	32180361	32180414	5	0.55847	0.68673	-0.128267	0.054	0.039	0.0931656
chr1	32317518	32317535	5	0.718	0.82273	-0.104733	0.0075	0.023	0.0313342
chr1	32317558	32317582	5	0.6266	0.78933	-0.162733	0.0026	0.007	0.0176522
chr1	32408131	32408453	5	0.67033	0.7792	-0.108867	0.0075	0.039	0.0313342
chr1	32553375	32553412	5	0.63247	0.74473	-0.112267	0.1	0.067	0.134759
chr1	32574589	32574838	5	0.0286	0.1604	-0.1318	0.012	0.023	0.0399656
chr1	32871000	32871045	5	0.45807	0.58827	-0.1302	0.044	0.039	0.0829482
chr1	33077373	33077406	5	0.66753	0.77467	-0.107133	0.093	0.17	0.12948
chr1	33077946	33078136	13	0.48121	0.63223	-0.151026	1.8e-05	0.0011	0.000497326
chr1	33112113	33112359	5	0.67213	0.7762	-0.104067	0.29	0.63	0.298711
chr1	33366629	33366694	5	0.70593	0.8128	-0.106867	0.11	0.36	0.144028
chr1	33366793	33366818	5	0.3474	0.19827	0.149133	0.04	0.013	0.0784711
chr1	33546571	33546630	5	0.596	0.48733	0.108667	0.085	0.1	0.122672
chr1	33547300	33547353	5	0.52887	0.63807	-0.1092	0.33	0.63	0.335586
chr1	33668067	33668124	6	0.39528	0.54589	-0.150611	0.034	0.057	0.0724399
chr1	33931961	33932252	5	0.70627	0.82233	-0.116067	0.24	0.35	0.255127
chr1	34628437	34628535	5	0.5726	0.69973	-0.127133	0.033	0.041	0.0706102
chr1	34629420	34629503	11	0.58779	0.48409	0.103697	0.13	0.33	0.161045
chr1	34630218	34630282	5	0.64227	0.5304	0.111867	0.014	0.041	0.044522
chr1	34630471	34630483	5	0.74107	0.6058	0.135267	0.071	0.24	0.109797
chr1	34630653	34630717	15	0.79996	0.87047	-0.1068	0.33	0.24	0.335586
chr1	34630733	34630784	7	0.70938	0.83281	-0.123429	0.04	0.019	0.0784711
chr1	34632253	34632319	5	0.35073	0.23993	0.1108	0.029	0.17	0.0650695
chr1	34632573	34632615	5	0.64733	0.52573	0.1216	0.13	0.36	0.161045
chr1	34642506	34642524	5	0.2294	0.39493	-0.165533	0.017	0.024	0.0486611
chr1	35037260	35037343	7	0.37548	0.50348	-0.128	0.011	0.07	0.0386271
chr1	35247170	35247342	5	0.52627	0.63233	-0.106067	0.13	0.35	0.161045
chr1	35247344	35247361	5	0.69813	0.57147	0.126667	0.12	0.066	0.15276
chr1	35252824	35253014	5	0.61867	0.72633	-0.107667	0.35	0.63	0.354668
chr1	35331859	35331919	5	0.63833	0.783	-0.144667	0.019	0.066	0.0517666
chr1	35344589	35344628	7	0.77629	0.60876	0.167524	0.16	0.11	0.184744
chr1	35351262	35351340	12	0.58744	0.69983	-0.112389	0.066	0.11	0.105399
chr1	35394588	35394647	5	0.68807	0.5778	0.110267	0.33	0.63	0.335586
chr1	35397217	35397302	9	0.31419	0.4533	-0.139111	0.00098	0.00098	0.010093
chr1	35582536	35582635	13	0.70054	0.76659	-0.143067	0.049	0.067	0.088355
chr1	36038932	36038977	5	0.83733	0.95333	-0.116	0.026	0.1	0.0614142
chr1	36108195	36108324	16	0.46133	0.58044	-0.119104	0.0033	0.0038	0.0207253
chr1	36253104	36253165	5	0.8886	0.63293	0.255667	0.029	0.065	0.0650695
chr1	36349481	36349530	5	0.1682	0.27413	-0.105933	0.24	0.16	0.255127
chr1	36549595	36549650	13	0.80959	0.64631	0.163282	0.0005	2.2e-06	0.0065678
chr1	36591271	36591390	7	0.62229	0.74405	-0.121762	0.072	0.15	0.111144
chr1	36788672	36788746	5	0.6818	0.58133	0.100467	0.12	0.17	0.15276
chr1	36789218	36789326	11	0.38915	0.4993	-0.110152	0.0011	0.0068	0.0106429
chr1	36866287	36866350	5	0.25433	0.41067	-0.156333	0.011	0.039	0.0386271
chr1	36866366	36866496	5	0.32653	0.43307	-0.106533	0.11	0.35	0.144028
chr1	37498706	37498829	5	0.80147	0.6714	0.130067	0.11	0.36	0.144028
chr1	37498846	37498890	5	0.6614	0.7628	-0.1014	0.19	0.48	0.210824
chr1	37499363	37499519	22	0.41794	0.46074	-0.108286	0.18	0.37	0.20362
chr1	37901268	37901392	5	0.61907	0.47033	0.148733	0.0013	0.0018	0.0117219
chr1	37986049	37986082	5	0.8702	0.7702	0.1	0.049	0.1	0.088355
chr1	38112112	38112157	5	0.32133	0.44313	-0.1218	0.11	0.24	0.144028
chr1	38184237	38184347	5	0.6938	0.80973	-0.115933	0.015	0.1	0.0452071
chr1	38197200	38197541	5	0.4794	0.57987	-0.100467	0.44	0.63	0.441538
chr1	38200933	38200956	7	0.51205	0.62395	-0.111905	0.034	0.15	0.0724399
chr1	38216602	38216659	5	0.5138	0.61747	-0.103667	0.1	0.069	0.134759
chr1	38219958	38219990	5	0.59467	0.48747	0.1072	0.19	0.36	0.210824
chr1	38227242	38227268	7	0.52229	0.62952	-0.107238	0.1	0.49	0.134759
chr1	38500756	38500961	6	0.49889	0.62528	-0.126389	0.066	0.13	0.105399
chr1	38504763	38504791	5	0.15153	0.26067	-0.109133	0.014	0.013	0.044522
chr1	38510630	38510663	5	0.63333	0.74593	-0.1126	0.19	0.49	0.210824
chr1	38511734	38511741	5	0.82813	0.6962	0.131933	0.18	0.48	0.20362
chr1	38511742	38511756	5	0.82527	0.71833	0.106933	0.13	0.25	0.161045
chr1	38512115	38512179	5	0.557	0.6918	-0.1348	0.085	0.25	0.122672
chr1	38794894	38794955	6	0.72906	0.55817	0.170889	0.0072	0.013	0.0313342
chr1	38821669	38821688	5	0.082	0.18333	-0.101333	0.002	0.024	0.0153923
chr1	39289572	39289633	5	0.5622	0.7066	-0.1444	0.036	0.025	0.0735275
chr1	39546892	39547307	60	0.50866	0.69617	-0.187511	4.2e-14	1.8e-20	1.03333e-11
chr1	39577076	39577123	5	0.86413	0.9834	-0.119267	0.014	0.066	0.044522
chr1	39978157	39978243	5	0.63373	0.7402	-0.106467	0.033	0.065	0.0706102
chr1	40075532	40075570	5	0.43307	0.5586	-0.125533	0.0058	0.023	0.027636
chr1	40098595	40098665	16	0.30696	0.61777	-0.310813	2.6e-12	7e-09	3.44444e-10
chr1	40137290	40137377	5	0.29253	0.1734	0.119133	0.18	0.25	0.20362
chr1	40148834	40148922	5	0.74727	0.86047	-0.1132	0.0075	0.039	0.0313342
chr1	40379020	40379187	5	0.65573	0.76567	-0.109933	0.18	0.35	0.20362
chr1	40388311	40388332	5	0.84493	0.95773	-0.1128	0.0058	0.013	0.027636
chr1	40572632	40572734	5	0.8848	0.7812	0.1036	0.0051	0.0036	0.0255577
chr1	40599089	40599125	5	0.87267	0.9768	-0.104133	0.0066	0.013	0.0294304
chr1	40601115	40601145	5	0.8882	0.99007	-0.101867	0.015	0.039	0.0452071
chr1	40635058	40635115	5	0.78893	0.65673	0.1322	0.18	0.48	0.20362
chr1	40671262	40671323	5	0.61047	0.717	-0.106533	0.58	0.16	0.580374
chr1	40743008	40743094	5	0.8616	0.97447	-0.112867	0.0075	0.0071	0.0313342
chr1	40769437	40769568	5	0.77787	0.88093	-0.103067	0.078	0.35	0.116508
chr1	40780272	40780754	5	0.72673	0.8342	-0.107467	0.12	0.35	0.15276
chr1	40781024	40781071	5	0.28247	0.44613	-0.163667	0.065	0.066	0.104005
chr1	40781801	40781824	5	0.64373	0.77267	-0.128933	0.024	0.1	0.0590008
chr1	40942754	40942832	7	0.49157	0.73671	-0.245143	0.00045	0.00084	0.00610445
chr1	40973411	40973607	12	0.54167	0.64333	-0.101667	0.029	0.091	0.0650695
chr1	40974339	40974683	50	0.33017	0.51737	-0.1872	4.8e-14	1.5e-11	1.03333e-11
chr1	41020303	41020582	5	0.8066	0.69707	0.109533	0.044	0.039	0.0829482
chr1	41050807	41050896	5	0.71393	0.8216	-0.107667	0.021	0.024	0.0544314
chr1	41265378	41265472	5	0.64787	0.7576	-0.109733	0.12	0.35	0.15276
chr1	41423496	41423553	5	0.5936	0.48707	0.106533	0.0017	0.007	0.0137097
chr1	41810856	41811030	5	0.60233	0.73013	-0.1278	0.11	0.067	0.144028
chr1	42717549	42717590	5	0.56493	0.6668	-0.101867	0.093	0.1	0.12948
chr1	42743294	42743340	5	0.8864	0.7076	0.1788	0.0045	0.023	0.0238952
chr1	42846562	42846594	9	0.85978	0.70315	0.15663	0.0088	0.00058	0.0347693
chr1	42858250	42858533	7	0.53414	0.64629	-0.112143	0.31	0.48	0.317078
chr1	42967666	42967792	5	0.61993	0.46647	0.153467	0.044	0.17	0.0829482
chr1	43201648	43201740	5	0.6134	0.5012	0.1122	0.19	0.35	0.210824
chr1	43204129	43204203	5	0.76693	0.87907	-0.112133	0.16	0.35	0.184744
chr1	43353468	43353521	5	0.7584	0.89247	-0.134067	0.012	0.066	0.0399656
chr1	43389876	43390118	39	0.52371	0.68551	-0.161803	4.6e-14	8.3e-13	1.03333e-11
chr1	43473444	43473493	5	0.98147	0.87087	0.1106	0.00072	0.0018	0.00827279
chr1	43585827	43586065	25	0.15948	0.42573	-0.266253	4.5e-14	1.5e-12	1.03333e-11
chr1	44015831	44015957	5	0.67627	0.5594	0.116867	0.13	0.16	0.161045
chr1	44107322	44107456	5	0.61113	0.47073	0.1404	0.18	0.35	0.20362
chr1	44446811	44447038	19	0.17342	0.29658	-0.123158	3.6e-06	3.8e-05	0.000129466
chr1	44871741	44871783	5	0.4464	0.55327	-0.106867	0.24	0.48	0.255127
chr1	45417794	45417926	11	0.48679	0.61418	-0.127394	0.004	0.028	0.0225209
chr1	46771622	46771669	5	0.63347	0.51067	0.1228	0.00098	0.00044	0.010093
chr1	46807113	46807263	5	0.49127	0.6538	-0.162533	0.065	0.066	0.104005
chr1	46859895	46859913	7	0.55943	0.42219	0.137238	0.012	0.21	0.0399656
chr1	46913925	46913947	5	0.5938	0.39267	0.201133	0.036	0.065	0.0735275
chr1	46913954	46913973	5	0.58673	0.47027	0.116467	0.27	0.63	0.280797
chr1	46951590	46951628	5	0.78167	0.66167	0.12	0.18	0.63	0.20362
chr1	46955342	46955385	5	0.63007	0.4514	0.178667	0.012	0.065	0.0399656
chr1	46955518	46955533	5	0.827	0.93613	-0.109133	0.011	0.023	0.0386271
chr1	47257527	47257635	5	0.34573	0.45613	-0.1104	0.078	0.07	0.116508
chr1	47672614	47672678	5	0.657	0.75853	-0.101533	0.15	0.25	0.177332
chr1	47857260	47857307	5	0.8192	0.94233	-0.123133	0.0039	0.013	0.0220782
chr1	47904039	47904315	7	0.43657	0.56795	-0.131381	0.02	0.048	0.0541769
chr1	47915809	47915894	11	0.45021	0.61573	-0.165515	0.025	0.1	0.0612164
chr1	48196144	48196197	7	0.32443	0.42876	-0.104333	0.08	0.1	0.119116
chr1	48937528	48937700	10	0.323	0.12727	0.195733	0.00083	0.00056	0.00909853
chr1	48944750	48944779	5	0.50493	0.65773	-0.1528	0.026	0.17	0.0614142
chr1	49182691	49182787	5	0.0694	0.18913	-0.119733	0.014	0.04	0.044522
chr1	49242035	49242066	5	0.62347	0.74653	-0.123067	0.0058	0.023	0.027636
chr1	49813816	49813829	5	0.27607	0.41707	-0.141	0.0035	0.013	0.0209136
chr1	50468063	50468104	5	0.57207	0.70667	-0.1346	0.024	0.04	0.0590008
chr1	50477596	50477687	5	0.746	0.63607	0.109933	0.024	0.17	0.0590008
chr1	50791917	50791946	5	0.373	0.2438	0.1292	0.078	0.16	0.116508
chr1	50798245	50798538	5	0.5776	0.68253	-0.104933	0.12	0.16	0.15276
chr1	50798726	50798750	5	0.6856	0.78673	-0.101133	0.0095	0.039	0.035697
chr1	50884848	50885146	17	0.74508	0.85214	-0.107059	0.0038	0.024	0.0220782
chr1	51810802	51810817	5	0.98187	0.87113	0.110733	0.026	0.065	0.0614142
chr1	52456075	52456107	5	0.69167	0.57827	0.1134	0.033	0.065	0.0706102
chr1	52485273	52485290	7	0.40595	0.51252	-0.106571	0.012	0.11	0.0399656
chr1	52532236	52532331	7	0.80433	0.95562	-0.151286	0.0016	0.0077	0.0135742
chr1	53187002	53187059	5	0.84967	0.712	0.137667	0.12	0.25	0.15276
chr1	53393181	53393224	5	0.21247	0.32653	-0.114067	0.036	0.023	0.0735275
chr1	53393533	53393571	10	0.48977	0.63597	-0.1462	6.6e-05	0.00095	0.00145726
chr1	53393640	53393692	5	0.65227	0.52167	0.1306	0.049	0.023	0.088355
chr1	53528270	53528301	5	0.38967	0.49207	-0.1024	0.27	0.64	0.280797
chr1	53528675	53528692	5	0.7988	0.69707	0.101733	0.19	0.49	0.210824
chr1	53533007	53533396	7	0.52148	0.655	-0.133524	0.048	0.38	0.088355
chr1	53926461	53926544	5	0.83307	0.9438	-0.110733	0.054	0.16	0.0931656
chr1	53955005	53955240	5	0.68187	0.78307	-0.1012	0.31	0.65	0.317078
chr1	54037493	54037543	7	0.64405	0.79214	-0.148095	0.0011	0.0015	0.0106429
chr1	54741968	54742208	5	0.61487	0.4744	0.140467	0.16	0.35	0.184744
chr1	54906390	54906452	7	0.49819	0.60505	-0.106857	0.085	0.38	0.122672
chr1	54953333	54953393	5	0.60247	0.4472	0.155267	0.036	0.17	0.0735275
chr1	55008515	55008669	5	0.21673	0.38787	-0.171133	0.11	0.17	0.144028
chr1	55028683	55028765	8	0.76271	0.893	-0.130292	0.00072	0.0045	0.00827279
chr1	55216231	55216280	5	0.6404	0.74913	-0.108733	0.15	0.17	0.177332
chr1	55266982	55267006	5	0.63693	0.76493	-0.128	0.024	0.068	0.0590008
chr1	55443235	55443321	5	0.79613	0.89787	-0.101733	0.026	0.11	0.0614142
chr1	55446387	55446451	10	0.46707	0.66257	-0.1955	0.0028	0.0057	0.018886
chr1	57325684	57325701	5	0.2138	0.33653	-0.122733	0.017	0.11	0.0486611
chr1	57956987	57957025	6	0.63717	0.75594	-0.118778	0.0036	0.0024	0.0214533
chr1	57967774	57967820	5	0.3064	0.4242	-0.1178	0.24	0.35	0.255127
chr1	57987736	57987769	5	0.31413	0.47193	-0.1578	0.029	0.11	0.0650695
chr1	58715938	58716064	5	0.8494	0.9548	-0.1054	0.0084	0.007	0.0334963
chr1	58844452	58844514	5	0.76087	0.60273	0.158133	0.078	0.17	0.116508
chr1	59165780	59165938	8	0.36608	0.50696	-0.140875	9.7e-05	0.0027	0.00199668
chr1	59248168	59248190	5	0.87447	0.75673	0.117733	0.026	0.16	0.0614142
chr1	59248192	59248239	5	0.8532	0.74347	0.109733	0.085	0.11	0.122672
chr1	60280627	60280716	15	0.52516	0.84204	-0.316889	3.4e-12	1.9e-09	4.35537e-10
chr1	60280784	60280812	5	0.84967	0.72287	0.1268	0.014	0.068	0.044522
chr1	60342442	60342495	7	0.41619	0.52867	-0.112476	0.015	0.15	0.0452071
chr1	60392234	60392284	5	0.1148	0.22007	-0.105267	0.026	0.16	0.0614142
chr1	60392510	60392531	5	0.14747	0.3152	-0.167733	0.0045	0.0072	0.0238952
chr1	61398152	61398383	5	0.35927	0.4664	-0.107133	0.13	0.24	0.161045
chr1	61594844	61594885	5	0.95153	0.82853	0.123	0.021	0.065	0.0544314
chr1	62107444	62107542	8	0.19567	0.409	-0.213333	0.00022	0.0016	0.00368649
chr1	62207879	62208087	11	0.16785	0.30561	-0.137758	0.027	2.2e-05	0.0635246
chr1	62208529	62208541	5	0.16	0.26927	-0.109267	0.049	0.023	0.088355
chr1	62820755	62820819	7	0.4351	0.54667	-0.111571	0.061	0.21	0.101058
chr1	63788407	63788440	5	0.7396	0.84287	-0.103267	0.093	0.013	0.12948
chr1	63788454	63788479	5	0.76513	0.98147	-0.216333	0.00053	0.00091	0.00673361
chr1	64240596	64240660	7	0.9061	0.79386	0.112238	0.09	0.1	0.129167
chr1	64936532	64936693	12	0.26158	0.13986	0.121722	8.6e-07	9.3e-07	3.58333e-05
chr1	65468995	65469017	5	0.8	0.9046	-0.1046	0.017	0.039	0.0486611
chr1	65480468	65480517	5	0.78413	0.68407	0.100067	0.078	0.35	0.116508
chr1	65592918	65593227	5	0.67227	0.80213	-0.129867	0.19	0.24	0.210824
chr1	65613790	65613828	11	0.684	0.79094	-0.106939	0.003	4.6e-05	0.0191201
chr1	65720749	65720864	5	0.2068	0.31047	-0.103667	0.017	0.023	0.0486611
chr1	66264191	66264230	5	0.7608	0.87367	-0.112867	0.015	0.067	0.0452071
chr1	67208397	67208443	5	0.698	0.803	-0.105	0.029	0.11	0.0650695
chr1	69354135	69354467	6	0.42622	0.30717	0.119056	0.19	0.63	0.210824
chr1	70539112	70539656	7	0.68114	0.79762	-0.116476	0.046	0.21	0.0862257
chr1	73764298	73764330	5	0.29587	0.4056	-0.109733	0.15	0.35	0.177332
chr1	75591173	75591206	7	0.55667	0.68719	-0.130524	0.0074	0.032	0.0313342
chr1	75772519	75772569	8	0.41171	0.51925	-0.107542	0.14	0.16	0.169624
chr1	75841690	75841765	5	0.60987	0.4764	0.133467	0.044	0.04	0.0829482
chr1	76002217	76002264	8	0.78992	0.89767	-0.10775	0.0026	0.0072	0.0176522
chr1	76505660	76505673	5	0.65773	0.7928	-0.135067	0.029	0.17	0.0650695
chr1	76578277	76578311	9	0.75607	0.60426	0.151815	0.0075	0.048	0.0313342
chr1	77100415	77100471	5	0.58053	0.69593	-0.1154	0.12	0.24	0.15276
chr1	77334868	77335031	6	0.53411	0.64644	-0.112333	0.1	0.13	0.134759
chr1	78442404	78442467	5	0.425	0.56013	-0.135133	0.0075	0.024	0.0313342
chr1	79596721	79596760	5	0.49853	0.6094	-0.110867	0.026	0.065	0.0614142
chr1	79603255	79603268	5	0.61527	0.76427	-0.149	0.015	0.024	0.0452071
chr1	79696545	79696891	5	0.5432	0.4174	0.1258	0.12	0.042	0.15276
chr1	79720104	79720165	5	0.51533	0.66713	-0.1518	0.014	0.065	0.044522
chr1	79826407	79826439	5	0.53433	0.64013	-0.1058	0.13	0.16	0.161045
chr1	80029883	80029973	5	0.30493	0.4194	-0.114467	0.21	0.36	0.229403
chr1	80517701	80517978	5	0.5596	0.6642	-0.1046	0.37	0.35	0.373616
chr1	80592989	80593096	5	0.60553	0.4422	0.163333	0.044	0.067	0.0829482
chr1	81058274	81058355	5	0.7322	0.8406	-0.1084	0.093	0.35	0.12948
chr1	81387212	81387302	5	0.72993	0.58867	0.141267	0.0066	0.023	0.0294304
chr1	81642814	81642874	5	0.7436	0.514	0.2296	0.017	0.013	0.0486611
chr1	83042688	83042759	7	0.62243	0.77171	-0.149286	0.011	0.0076	0.0386271
chr1	84804371	84804417	5	0.4828	0.613	-0.1302	0.0051	0.065	0.0255577
chr1	86214522	86214621	5	0.4934	0.59547	-0.102067	0.15	0.48	0.177332
chr1	86555458	86555646	5	0.31887	0.48913	-0.170267	0.026	0.16	0.0614142
chr1	86716177	86716224	5	0.8686	0.74107	0.127533	0.065	0.35	0.104005
chr1	86773655	86773745	11	0.2513	0.37873	-0.127424	0.026	0.13	0.0614142
chr1	86861483	86861607	14	0.30469	0.4166	-0.111905	0.0016	0.016	0.0135742
chr1	87150370	87150432	5	0.12787	0.2978	-0.169933	0.0058	0.013	0.027636
chr1	87365573	87365603	5	0.78627	0.9706	-0.184333	0.00021	0.00019	0.0035342
chr1	87430010	87430069	5	0.68867	0.83233	-0.143667	0.024	0.013	0.0590008
chr1	88360980	88361071	5	0.74773	0.59793	0.1498	0.011	0.16	0.0386271
chr1	89236360	89236414	5	0.75633	0.86247	-0.106133	0.0066	0.023	0.0294304
chr1	89664533	89664553	5	0.3646	0.2518	0.1128	0.13	0.35	0.161045
chr1	89739295	89739340	5	0.4856	0.34867	0.136933	0.054	0.066	0.0931656
chr1	90228686	90228751	5	0.5078	0.38607	0.121733	0.15	0.64	0.177332
chr1	90726076	90726129	5	0.27853	0.38373	-0.1052	0.14	0.25	0.169624
chr1	90726129	90726172	5	0.5478	0.64867	-0.100867	0.14	0.17	0.169624
chr1	91176664	91176692	5	0.73473	0.5902	0.144533	0.12	0.49	0.15276
chr1	91184105	91184144	5	0.75673	0.90427	-0.147533	0.024	0.16	0.0590008
chr1	91317294	91317346	5	0.6222	0.9036	-0.2814	5.3e-05	1.5e-05	0.00122065
chr1	91340385	91340476	5	0.76073	0.65367	0.107067	0.071	0.24	0.109797
chr1	91730030	91730091	6	0.79606	0.61417	0.181889	0.0026	0.022	0.0176522
chr1	92414882	92414917	7	0.82329	0.92752	-0.104238	0.046	0.15	0.0862257
chr1	92427625	92428110	7	0.57429	0.68614	-0.111857	0.29	0.37	0.298711
chr1	92683286	92683326	7	0.67795	0.7799	-0.101952	0.094	0.38	0.130485
chr1	92951781	92951882	18	0.42261	0.64319	-0.220574	3.1e-08	3.4e-07	1.841e-06
chr1	94179738	94179789	5	0.6478	0.77947	-0.131667	0.0095	0.023	0.035697
chr1	95149539	95149603	5	0.59247	0.73307	-0.1406	0.22	0.64	0.237283
chr1	95700843	95700975	10	0.86947	0.76423	0.105233	0.0016	0.0034	0.0135742
chr1	96135206	96135317	7	0.45114	0.55852	-0.107381	0.061	0.21	0.101058
chr1	96688985	96689173	5	0.56147	0.66627	-0.1048	0.19	0.35	0.210824
chr1	96935646	96935820	5	0.6534	0.7622	-0.1088	0.21	0.24	0.229403
chr1	97054800	97054877	5	0.40613	0.51693	-0.1108	0.15	0.64	0.177332
chr1	98760268	98760307	5	0.61093	0.84693	-0.236	0.00028	0.00092	0.00425908
chr1	98978815	98978895	5	0.6208	0.75473	-0.133933	0.00072	0.0019	0.00827279
chr1	99544336	99544417	5	0.64293	0.76433	-0.1214	0.13	0.35	0.161045
chr1	100289082	100289122	5	0.79973	0.67067	0.129067	0.1	0.25	0.134759
chr1	100426460	100426502	5	0.64493	0.95	-0.305067	3.7e-06	2.2e-06	0.000132755
chr1	100437019	100437054	5	0.66647	0.54493	0.121533	0.065	0.16	0.104005
chr1	101701733	101701931	13	0.62472	0.85482	-0.230103	1.3e-08	6.2e-06	8.19106e-07
chr1	102623389	102623425	5	0.28827	0.17893	0.109333	0.18	0.16	0.20362
chr1	102945576	102945588	5	0.54667	0.43013	0.116533	0.12	0.48	0.15276
chr1	103047927	103047968	5	0.58567	0.70733	-0.121667	0.059	0.24	0.0979646
chr1	104587284	104587464	7	0.37486	0.25233	0.122524	0.08	0.1	0.119116
chr1	104615880	104615893	5	0.83433	0.9596	-0.125267	0.0011	0.0009	0.0106429
chr1	104719874	104719929	11	0.61752	0.72179	-0.104273	0.0055	0.057	0.0272975
chr1	104719973	104720101	5	0.61467	0.51073	0.103933	0.25	0.63	0.262712
chr1	105058284	105058328	5	0.52467	0.65847	-0.1338	0.13	0.49	0.161045
chr1	105301909	105301965	5	0.42233	0.5676	-0.145267	0.026	0.039	0.0614142
chr1	105743434	105743455	5	0.67033	0.8244	-0.154067	0.00021	0.0019	0.0035342
chr1	106469443	106469494	5	0.2888	0.39	-0.1012	0.14	0.35	0.169624
chr1	107161502	107161590	5	0.39573	0.50273	-0.107	0.31	0.64	0.317078
chr1	107599773	107599827	5	0.38893	0.60253	-0.2136	0.036	0.066	0.0735275
chr1	107600012	107600046	9	0.81311	0.92174	-0.10863	1.7e-05	0.00056	0.000476492
chr1	108702793	108702903	12	0.73633	0.89944	-0.163111	9.9e-09	9.7e-06	6.44748e-07
chr1	109029194	109029435	5	0.42013	0.55933	-0.1392	0.22	0.63	0.237283
chr1	110283223	110283276	5	0.23293	0.37987	-0.146933	0.026	0.066	0.0614142
chr1	110627127	110627184	5	0.80767	0.6862	0.121467	0.27	0.63	0.280797
chr1	110672849	110672871	5	0.787	0.64593	0.141067	0.054	0.17	0.0931656
chr1	110694679	110694783	5	0.2014	0.33073	-0.129333	0.059	0.066	0.0979646
chr1	110728248	110728341	5	0.68673	0.55387	0.132867	0.24	0.49	0.255127
chr1	110737670	110737725	5	0.46393	0.56667	-0.102733	0.15	0.36	0.177332
chr1	110752540	110752585	5	0.60507	0.719	-0.113933	0.19	0.48	0.210824
chr1	110771168	110771233	5	0.74887	0.85353	-0.104667	0.014	0.065	0.044522
chr1	110783273	110783374	5	0.3336	0.43413	-0.100533	0.029	0.026	0.0650695
chr1	111098107	111098123	5	0.66973	0.81053	-0.1408	0.024	0.039	0.0590008
chr1	111149194	111149214	5	0.49627	0.5966	-0.100333	0.036	0.11	0.0735275
chr1	111499860	111499952	5	0.364	0.50667	-0.142667	0.1	0.36	0.134759
chr1	111583231	111583349	5	0.6416	0.7634	-0.1218	0.071	0.35	0.109797
chr1	112336019	112336090	6	0.022222	0.13694	-0.114722	0.062	0.088	0.102616
chr1	112515015	112515046	5	0.7418	0.8822	-0.1404	0.0075	0.04	0.0313342
chr1	112531600	112531616	5	0.9096	0.80693	0.102667	0.036	0.16	0.0735275
chr1	112532201	112532329	25	0.17636	0.38892	-0.21256	4.4e-14	1.2e-20	1.03333e-11
chr1	112532432	112532454	5	0.28113	0.42447	-0.143333	0.019	0.065	0.0517666
chr1	112533122	112533137	5	0.2932	0.16673	0.126467	0.024	0.039	0.0590008
chr1	113044754	113044960	5	0.79507	0.922	-0.126933	0.11	0.35	0.144028
chr1	113441883	113441987	10	0.7403	0.8644	-0.1241	0.00018	0.0021	0.00315254
chr1	113633319	113633384	5	0.7348	0.8836	-0.1488	0.021	0.023	0.0544314
chr1	113926794	113926811	5	0.82747	0.6824	0.145067	0.04	0.065	0.0784711
chr1	114556608	114556618	5	0.45367	0.57673	-0.123067	0.029	0.013	0.0650695
chr1	114695046	114695138	5	0.306	0.42393	-0.117933	0.11	0.068	0.144028
chr1	114695396	114695413	5	0.76613	0.9004	-0.134267	0.0066	0.023	0.0294304
chr1	114695543	114695568	5	0.62827	0.5124	0.115867	0.065	0.11	0.104005
chr1	114696454	114696626	30	0.38532	0.38243	-0.132778	0.00056	0.013	0.00708571
chr1	114698002	114698027	6	0.64961	0.74978	-0.100167	0.15	0.27	0.177332
chr1	114785661	114785689	5	0.63093	0.7558	-0.124867	0.21	0.36	0.229403
chr1	115212351	115212380	5	0.1818	0.34367	-0.161867	7.5e-05	1.5e-05	0.00160788
chr1	115323124	115323188	10	0.22203	0.081767	0.140267	6.4e-11	4.5e-11	6.35897e-09
chr1	115490296	115490351	5	0.7716	0.8744	-0.1028	0.024	0.023	0.0590008
chr1	115690591	115690761	11	0.58839	0.70503	-0.116636	0.0069	0.043	0.0305048
chr1	115825818	115825997	6	0.60256	0.49439	0.108167	0.082	0.27	0.121883
chr1	115881234	115881326	16	0.48702	0.60177	-0.11475	0.0029	0.085	0.0191201
chr1	116381014	116381080	5	0.45267	0.57287	-0.1202	0.065	0.36	0.104005
chr1	116519323	116519384	12	0.47628	0.59589	-0.119611	0.0022	0.0041	0.0166585
chr1	116961203	116961336	36	0.18614	0.35606	-0.169926	4.3e-14	3.6e-12	1.03333e-11
chr1	117173678	117173797	7	0.33552	0.4939	-0.158381	0.0016	0.00045	0.0135742
chr1	117503938	117503982	5	0.95433	0.84153	0.1128	0.0075	0.039	0.0313342
chr1	118727789	118727885	8	0.62246	0.76512	-0.142667	0.076	0.48	0.116508
chr1	120119812	120119858	5	0.56313	0.69813	-0.135	0.078	0.16	0.116508
chr1	120190002	120190034	5	0.49873	0.6154	-0.116667	0.21	0.48	0.229403
chr1	120218440	120218972	5	0.53573	0.65273	-0.117	0.12	0.25	0.15276
chr1	120890310	120890342	5	0.3246	0.53913	-0.214533	0.019	0.065	0.0517666
chr1	120906331	120906340	5	0.68633	0.789	-0.102667	0.049	0.039	0.088355
chr1	142862143	142862369	9	0.3933	0.50089	-0.107593	0.0014	0.0026	0.0124856
chr1	142885352	142885581	5	0.43193	0.55173	-0.1198	0.0035	0.0074	0.0209136
chr1	142885993	142886040	5	0.269	0.46767	-0.198667	0.015	0.11	0.0452071
chr1	142890983	142891121	7	0.34233	0.51371	-0.171381	0.001	0.0026	0.0102175
chr1	143146305	143146378	5	0.54047	0.6602	-0.119733	0.054	0.023	0.0931656
chr1	143275046	143275071	5	0.6784	0.57753	0.100867	0.47	0.79	0.471003
chr1	143275209	143275270	5	0.43373	0.297	0.136733	0.16	0.35	0.184744
chr1	143277232	143277514	7	0.68071	0.47867	0.202048	0.00021	0.0045	0.0035342
chr1	144593359	144593425	10	0.17543	0.40963	-0.2342	1.1e-05	0.00035	0.000331712
chr1	145152332	145152377	5	0.8318	0.59213	0.239667	0.00011	9e-05	0.0021859
chr1	145422362	145422660	7	0.78262	0.90848	-0.125857	0.008	0.0044	0.0330843
chr1	145433826	145433886	5	0.65273	0.82067	-0.167933	0.04	0.065	0.0784711
chr1	145559773	145560138	7	0.63567	0.75948	-0.12381	0.2	0.29	0.221571
chr1	145670568	145670591	5	0.0898	0.248	-0.1582	0.049	0.013	0.088355
chr1	145670613	145670653	5	0.30167	0.42193	-0.120267	0.29	0.49	0.298711
chr1	146346520	146346697	5	0.46393	0.35547	0.108467	0.18	0.36	0.20362
chr1	146346762	146346809	5	0.6278	0.78013	-0.152333	0.11	0.35	0.144028
chr1	146374669	146374711	5	0.12367	0.26333	-0.139667	5.3e-05	0.00045	0.00122065
chr1	146523451	146523500	5	0.56593	0.454	0.111933	0.1	0.35	0.134759
chr1	146550757	146550782	5	0.52687	0.42273	0.104133	0.11	0.16	0.144028
chr1	146551047	146551099	5	0.84967	0.95347	-0.1038	0.00053	0.0037	0.00673361
chr1	146696303	146696382	8	0.78525	0.65654	0.128708	0.023	0.29	0.0590008
chr1	146895083	146895117	10	0.59897	0.7018	-0.102833	0.00088	0.018	0.00944598
chr1	146991444	146991590	5	0.63527	0.76187	-0.1266	0.14	0.35	0.169624
chr1	147009838	147009896	5	0.8064	0.92947	-0.123067	0.049	0.066	0.088355
chr1	147141850	147141858	5	0.41307	0.55427	-0.1412	0.0045	0.039	0.0238952
chr1	147141941	147142195	30	0.18201	0.30968	-0.133282	0.0031	0.00012	0.0196203
chr1	147142248	147142313	7	0.43457	0.15933	0.275238	9e-08	2.1e-08	4.69697e-06
chr1	147283568	147283627	5	0.51907	0.6516	-0.132533	0.0058	0.065	0.027636
chr1	147505315	147505384	5	0.8944	0.7714	0.123	0.017	0.039	0.0486611
chr1	147782330	147782369	5	0.98027	0.861	0.119267	0.0058	0.023	0.027636
chr1	147850526	147850626	5	0.57187	0.46107	0.1108	0.15	0.36	0.177332
chr1	147999942	148000000	5	0.54813	0.69887	-0.150733	0.059	0.24	0.0979646
chr1	148238817	148238877	5	0.64253	0.74333	-0.1008	0.25	0.16	0.262712
chr1	148247397	148247802	19	0.47968	0.35605	0.123632	1e-05	5.6e-05	0.00030572
chr1	148527300	148527340	5	0.54567	0.445	0.100667	0.24	0.35	0.255127
chr1	148599188	148599246	5	0.70193	0.58547	0.116467	0.16	0.35	0.184744
chr1	148760590	148760650	10	0.4711	0.58557	-0.114467	0.0014	0.005	0.0124856
chr1	148761230	148761288	5	0.76787	0.62627	0.1416	0.071	0.35	0.109797
chr1	148902029	148902065	12	0.58442	0.69289	-0.108472	0.015	0.056	0.0452071
chr1	148903342	148903435	5	0.4664	0.56953	-0.103133	0.1	0.35	0.134759
chr1	149132008	149132030	5	0.60853	0.78193	-0.1734	0.036	0.16	0.0735275
chr1	149135243	149135255	5	0.76067	0.8726	-0.111933	0.015	0.11	0.0452071
chr1	149145011	149145065	10	0.14803	0.35457	-0.206533	0.00043	0.00031	0.00590345
chr1	149145164	149145200	5	0.3964	0.5002	-0.1038	0.24	0.16	0.255127
chr1	149147040	149147073	5	0.2052	0.32433	-0.119133	0.0075	0.0075	0.0313342
chr1	149147633	149147642	5	0.39093	0.521	-0.130067	0.00028	0.0019	0.00425908
chr1	149193904	149193953	5	0.47367	0.7568	-0.283133	7.5e-05	0.00021	0.00160788
chr1	149194292	149194565	33	0.40992	0.45975	-0.104458	0.043	0.053	0.0829482
chr1	149194587	149194611	5	0.88373	0.72633	0.1574	0.0051	0.0072	0.0255577
chr1	149212400	149212435	5	0.64627	0.48487	0.1614	0.059	0.042	0.0979646
chr1	149212611	149212973	32	0.35703	0.39161	-0.104048	0.25	0.61	0.262712
chr1	149224408	149224484	5	0.6184	0.4218	0.1966	0.0023	0.0009	0.0166979
chr1	149350917	149351172	14	0.42683	0.32181	0.105024	0.086	0.54	0.124069
chr1	149400027	149400059	5	0.5858	0.70567	-0.119867	0.13	0.35	0.161045
chr1	149415124	149415178	5	0.602	0.7144	-0.1124	0.065	0.067	0.104005
chr1	149673318	149673365	5	0.63807	0.75427	-0.1162	0.15	0.49	0.177332
chr1	149718892	149719142	5	0.67687	0.81753	-0.140667	0.15	0.35	0.177332
chr1	149860929	149861018	5	0.36833	0.46893	-0.1006	0.071	0.24	0.109797
chr1	150122388	150122400	5	0.72153	0.8304	-0.108867	0.0039	0.023	0.0220782
chr1	150122613	150122633	5	0.62907	0.80527	-0.1762	0.0035	0.007	0.0209136
chr1	150416255	150416366	8	0.58617	0.70246	-0.116292	0.039	0.084	0.0784711
chr1	150522042	150522090	11	0.48276	0.65173	-0.16897	8e-05	0.00031	0.00170564
chr1	151043829	151043997	5	0.21107	0.34787	-0.1368	0.14	0.17	0.169624
chr1	151044924	151044973	7	0.64757	0.77638	-0.12881	0.064	0.29	0.104005
chr1	151118918	151118984	25	0.21015	0.32969	-0.119547	7e-08	3.6e-06	3.72852e-06
chr1	151624326	151624363	7	0.80981	0.91662	-0.10681	6.7e-05	0.00045	0.00147514
chr1	151688363	151688415	5	0.50553	0.61707	-0.111533	0.16	0.49	0.184744
chr1	151776896	151777081	5	0.828	0.70947	0.118533	0.071	0.11	0.109797
chr1	152051309	152051371	7	0.29	0.40671	-0.116714	0.02	0.031	0.0541769
chr1	152080180	152080256	5	0.7902	0.90507	-0.114867	0.0051	0.023	0.0255577
chr1	152161508	152161515	5	0.80187	0.92867	-0.1268	0.00098	0.013	0.010093
chr1	152189005	152189043	5	0.37813	0.54813	-0.17	0.019	0.024	0.0517666
chr1	152229295	152229309	5	0.2774	0.4142	-0.1368	0.0026	0.0069	0.0176522
chr1	153094599	153094656	5	0.35727	0.46747	-0.1102	0.29	0.49	0.298711
chr1	153233556	153233578	5	0.7138	0.8222	-0.1084	0.16	0.16	0.184744
chr1	153352890	153352911	6	0.25944	0.39394	-0.1345	0.025	0.057	0.0612164
chr1	153352916	153352984	5	0.44013	0.54587	-0.105733	0.16	0.16	0.184744
chr1	153668798	153668888	5	0.8412	0.99173	-0.150533	0.00028	8.6e-05	0.00425908
chr1	153669053	153669110	5	0.80513	0.9092	-0.104067	0.22	0.48	0.237283
chr1	153767569	153767616	5	0.41873	0.55707	-0.138333	0.059	0.025	0.0979646
chr1	154315507	154315538	5	0.91767	0.8122	0.105467	0.049	0.16	0.088355
chr1	154330198	154330289	5	0.847	0.96407	-0.117067	0.4	0.35	0.402702
chr1	154474107	154474190	7	0.79852	0.94757	-0.149048	0.00094	0.013	0.00997262
chr1	154618175	154618265	5	0.69347	0.82027	-0.1268	0.0095	0.04	0.035697
chr1	155035284	155035343	7	0.76586	0.87367	-0.10781	0.072	0.02	0.111144
chr1	155035676	155035697	5	0.57733	0.705	-0.127667	0.071	0.17	0.109797
chr1	155244645	155244682	5	0.7644	0.9186	-0.1542	0.0011	0.007	0.0106429
chr1	155292514	155292537	5	0.58193	0.7208	-0.138867	0.044	0.11	0.0829482
chr1	155292561	155292579	5	0.655	0.79553	-0.140533	0.0066	0.16	0.0294304
chr1	155292603	155292614	5	0.4396	0.59293	-0.153333	0.017	0.1	0.0486611
chr1	155292614	155292635	5	0.19367	0.33773	-0.144067	0.0035	0.0019	0.0209136
chr1	155655926	155655984	5	0.72567	0.86667	-0.141	0.015	0.023	0.0452071
chr1	156157211	156157266	5	0.62967	0.7674	-0.137733	0.012	0.0036	0.0399656
chr1	156186250	156186285	5	0.5232	0.66167	-0.138467	0.024	0.039	0.0590008
chr1	156215286	156215327	5	0.60733	0.74567	-0.138333	0.014	0.16	0.044522
chr1	156261346	156261539	26	0.49413	0.63286	-0.138731	1.1e-09	9.1e-08	8.525e-08
chr1	156297447	156297492	5	0.74187	0.85613	-0.114267	0.0095	0.023	0.035697
chr1	156594565	156594574	5	0.4806	0.5936	-0.113	0.012	0.068	0.0399656
chr1	156674826	156674874	5	0.5568	0.41667	0.140133	0.059	0.11	0.0979646
chr1	156675027	156675074	5	0.31673	0.1934	0.123333	0.093	0.25	0.12948
chr1	156675987	156676224	5	0.63227	0.39787	0.2344	0.036	0.17	0.0735275
chr1	156783802	156783896	8	0.25225	0.37279	-0.120542	0.00053	0.0027	0.00673361
chr1	156784036	156784112	5	0.43467	0.60407	-0.1694	0.011	0.024	0.0386271
chr1	156829007	156829132	5	0.40747	0.5478	-0.140333	0.065	0.023	0.104005
chr1	156829847	156829881	7	0.55005	0.6859	-0.135857	0.00017	0.00085	0.00300114
chr1	156883221	156883286	5	0.75593	0.62467	0.131267	0.078	0.25	0.116508
chr1	157416354	157416376	5	0.5502	0.67047	-0.120267	0.25	0.35	0.262712
chr1	157973423	157973684	5	0.53867	0.65513	-0.116467	0.16	0.35	0.184744
chr1	158098548	158098633	5	0.7074	0.5972	0.1102	0.093	0.11	0.12948
chr1	158983185	158983249	5	0.62213	0.78693	-0.1648	0.019	0.065	0.0517666
chr1	159104338	159104392	5	0.4668	0.6048	-0.138	0.071	0.24	0.109797
chr1	159158369	159158420	5	0.38433	0.50107	-0.116733	0.29	0.36	0.298711
chr1	159201946	159201969	5	0.7224	0.85713	-0.134733	0.019	0.039	0.0517666
chr1	159229559	159229616	9	0.26285	0.40522	-0.14237	0.076	0.033	0.116508
chr1	160502187	160502420	6	0.14072	0.2465	-0.105778	0.076	0.13	0.116508
chr1	160791917	160791925	5	0.77073	0.88167	-0.110933	0.0084	0.04	0.0334963
chr1	161017797	161017864	5	0.6822	0.81513	-0.132933	0.0051	0.013	0.0255577
chr1	161228799	161228859	7	0.82143	0.93762	-0.11619	0.011	0.031	0.0386271
chr1	161239644	161239825	5	0.56627	0.6718	-0.105533	0.04	0.043	0.0784711
chr1	161283845	161283966	17	0.44624	0.56255	-0.116314	8.2e-05	0.019	0.00174588
chr1	161292977	161293079	8	0.61575	0.73621	-0.120458	0.01	0.0045	0.0372596
chr1	161413237	161413245	5	0.47767	0.5894	-0.111733	0.085	0.16	0.122672
chr1	161413246	161413258	5	0.45187	0.5902	-0.138333	0.0066	0.013	0.0294304
chr1	161417299	161417385	25	0.57795	0.7158	-0.137853	1e-09	1.7e-06	7.78894e-08
chr1	161417444	161421535	569	0.72143	0.74134	0.2264	7.4e-05	1e-05	0.0016042
chr1	161424847	161424861	5	0.32173	0.445	-0.123267	0.059	0.0036	0.0979646
chr1	161424875	161424887	5	0.2	0.37033	-0.170333	0.036	0.0018	0.0735275
chr1	161432988	161433041	19	0.62947	0.78486	-0.155386	7.8e-14	1e-09	1.45774e-11
chr1	161439770	161439842	11	0.62436	0.75794	-0.133576	5.2e-05	8.6e-06	0.00121752
chr1	161440277	161440284	5	0.61787	0.72593	-0.108067	0.036	0.065	0.0735275
chr1	161535740	161535771	5	0.71867	0.86387	-0.1452	0.0035	0.0071	0.0209136
chr1	161697203	161697331	14	0.40564	0.14433	0.26131	7.5e-10	2.7e-07	5.99227e-08
chr1	161953898	161954227	7	0.786	0.90829	-0.122286	0.13	0.49	0.161045
chr1	161993423	161993453	5	0.2728	0.37993	-0.107133	0.0039	0.00043	0.0220782
chr1	161993553	161993567	5	0.1528	0.2702	-0.1174	0.029	0.0072	0.0650695
chr1	163076873	163077008	5	0.57107	0.67133	-0.100267	0.059	0.1	0.0979646
chr1	164927943	164928034	6	0.68594	0.79211	-0.106167	0.054	0.13	0.0931656
chr1	165261021	165261076	13	0.52823	0.58113	-0.1046	0.078	0.04	0.116508
chr1	165322281	165322317	5	0.50333	0.6272	-0.123867	0.25	0.65	0.262712
chr1	165326081	165326128	9	0.66507	0.77978	-0.114704	0.0079	0.0092	0.0327845
chr1	165777389	165777445	5	0.4642	0.68167	-0.217467	0.0026	0.041	0.0176522
chr1	166056280	166056451	12	0.51183	0.66286	-0.151028	0.00037	0.034	0.0052663
chr1	166134564	166134684	7	0.77157	0.87929	-0.107714	0.014	0.049	0.044522
chr1	166135930	166136070	45	0.43227	0.55357	-0.121296	5.3e-07	9.4e-05	2.30758e-05
chr1	166136215	166136267	5	0.3516	0.474	-0.1224	0.35	0.64	0.354668
chr1	166218052	166218141	5	0.30913	0.41027	-0.101133	0.15	0.35	0.177332
chr1	166808345	166808365	5	0.32133	0.5054	-0.184067	0.012	0.069	0.0399656
chr1	166889943	166889981	5	0.652	0.5446	0.1074	0.033	0.065	0.0706102
chr1	166998893	166998907	5	0.42653	0.17693	0.2496	0.0058	0.039	0.027636
chr1	167095321	167095526	5	0.45573	0.57347	-0.117733	0.13	0.25	0.161045
chr1	167444091	167444150	7	0.72838	0.83638	-0.108	0.026	0.11	0.0614142
chr1	167453135	167453259	5	0.75673	0.64007	0.116667	0.078	0.24	0.116508
chr1	167585672	167585938	5	0.6936	0.80913	-0.115533	0.22	0.63	0.237283
chr1	168081649	168081697	5	0.713	0.51787	0.195133	0.0058	0.065	0.027636
chr1	168104936	168105071	5	0.687	0.8158	-0.1288	0.059	0.065	0.0979646
chr1	168117019	168117088	5	0.22227	0.33313	-0.110867	0.059	0.11	0.0979646
chr1	168723024	168723081	5	0.79593	0.93153	-0.1356	0.021	0.023	0.0544314
chr1	169637313	169637568	5	0.41367	0.51573	-0.102067	0.15	0.24	0.177332
chr1	170043854	170043922	5	0.12507	0.25747	-0.1324	0.0015	0.0037	0.012931
chr1	170220182	170220194	5	0.4004	0.5076	-0.1072	0.0066	0.1	0.0294304
chr1	170619652	170619685	5	0.9766	0.82487	0.151733	0.049	0.065	0.088355
chr1	170635930	170635960	5	0.853	0.96667	-0.113667	0.003	0.007	0.0191201
chr1	171870022	171870044	5	0.72593	0.8424	-0.116467	0.049	0.065	0.088355
chr1	173492434	173492669	5	0.86453	0.96593	-0.1014	0.012	0.024	0.0399656
chr1	173794755	173794797	5	0.62007	0.73333	-0.113267	0.29	0.64	0.298711
chr1	174807849	174807883	5	0.68273	0.57847	0.104267	0.033	0.066	0.0706102
chr1	175014374	175014415	5	0.41567	0.5456	-0.129933	0.065	0.35	0.104005
chr1	175048593	175048651	8	0.69083	0.88408	-0.19325	0.00024	0.0009	0.003875
chr1	175474461	175474520	5	0.5078	0.61953	-0.111733	0.11	0.11	0.144028
chr1	176236941	176236976	5	0.64593	0.7554	-0.109467	0.24	0.35	0.255127
chr1	176366423	176366467	5	0.43867	0.5414	-0.102733	0.21	0.48	0.229403
chr1	176483629	176483930	5	0.88533	0.77367	0.111667	0.044	0.11	0.0829482
chr1	176526263	176526282	5	0.6446	0.79733	-0.152733	0.0039	0.065	0.0220782
chr1	176569759	176569798	5	0.82447	0.7186	0.105867	0.054	0.066	0.0931656
chr1	176685937	176685969	5	0.64253	0.75153	-0.109	0.11	0.16	0.144028
chr1	177308365	177308388	5	0.3712	0.48007	-0.108867	0.011	0.1	0.0386271
chr1	177419213	177419262	5	0.6896	0.57913	0.110467	0.25	0.63	0.262712
chr1	179050831	179050984	16	0.50981	0.63181	-0.128633	0.0006	0.0032	0.00753036
chr1	179051043	179051102	5	0.23447	0.38313	-0.148667	0.00062	0.007	0.00756693
chr1	179057074	179057117	5	0.75453	0.6522	0.102333	0.47	0.64	0.471003
chr1	179555466	179555502	5	0.76967	0.87433	-0.104667	0.015	0.16	0.0452071
chr1	179555565	179555575	5	0.70033	0.59947	0.100867	0.071	0.16	0.109797
chr1	179638069	179638126	5	0.473	0.6646	-0.1916	0.0051	0.068	0.0255577
chr1	179712502	179712518	5	0.69353	0.82767	-0.134133	0.033	0.11	0.0706102
chr1	179713348	179713377	5	0.7546	0.88733	-0.132733	0.11	0.35	0.144028
chr1	179751165	179751208	5	0.743	0.59813	0.144867	0.054	0.11	0.0931656
chr1	179788159	179788334	5	0.55693	0.67127	-0.114333	0.085	0.16	0.122672
chr1	180059604	180059675	14	0.68202	0.78324	-0.101214	0.0085	0.016	0.0338602
chr1	180118111	180118170	5	0.6604	0.52227	0.138133	0.071	0.36	0.109797
chr1	180184041	180184055	5	0.59287	0.69647	-0.1036	0.19	0.065	0.210824
chr1	180200924	180200976	8	0.25633	0.40013	-0.143792	0.0013	0.0045	0.0117219
chr1	180302829	180303037	13	0.50033	0.38723	0.113103	0.05	0.32	0.0899594
chr1	181074851	181074912	12	0.45072	0.69906	-0.248333	9.1e-06	0.00019	0.000283233
chr1	181287301	181287342	5	0.53527	0.67447	-0.1392	0.044	0.066	0.0829482
chr1	181451957	181452049	12	0.71333	0.84461	-0.131278	0.00034	0.0028	0.00487061
chr1	181980049	181980095	5	0.60527	0.7266	-0.121333	0.093	0.35	0.12948
chr1	182359924	182360145	28	0.50063	0.6395	-0.138869	4.5e-14	1.7e-11	1.03333e-11
chr1	182361073	182361147	5	0.53653	0.68667	-0.150133	0.00062	0.013	0.00756693
chr1	182546114	182546161	5	0.46787	0.59913	-0.131267	0.25	0.35	0.262712
chr1	182583660	182583719	8	0.55058	0.40271	0.147875	0.0094	0.011	0.035697
chr1	184080983	184081047	7	0.56319	0.67057	-0.107381	0.013	0.11	0.0429546
chr1	184242336	184242431	14	0.727	0.60131	0.12569	0.00048	0.011	0.00635354
chr1	184633264	184633416	16	0.39387	0.28829	0.105583	0.0066	0.039	0.0294304
chr1	184970932	184971010	17	0.24496	0.39422	-0.149255	3.7e-08	1.5e-05	2.13993e-06
chr1	185327130	185327143	5	0.39613	0.5296	-0.133467	0.029	0.067	0.0650695
chr1	185423823	185423871	5	0.53993	0.6456	-0.105667	0.029	0.067	0.0650695
chr1	185608388	185608435	5	0.6572	0.76707	-0.109867	0.00084	0.007	0.00909853
chr1	185703324	185703586	23	0.52981	0.70519	-0.175377	1.9e-09	1.7e-08	1.41587e-07
chr1	187043498	187043541	5	0.33093	0.53793	-0.207	0.0015	0.0069	0.012931
chr1	187297622	187297685	5	0.43513	0.54793	-0.1128	0.017	0.023	0.0486611
chr1	187585614	187585893	5	0.66953	0.7878	-0.118267	0.1	0.17	0.134759
chr1	188083978	188084009	5	0.6792	0.8646	-0.1854	0.0023	0.0071	0.0166979
chr1	188513534	188513596	5	0.60747	0.7642	-0.156733	0.019	0.039	0.0517666
chr1	188808875	188808888	5	0.79127	0.8926	-0.101333	0.1	0.24	0.134759
chr1	188987382	188987475	5	0.45787	0.34893	0.108933	0.14	0.24	0.169624
chr1	188995175	188995265	5	0.67707	0.7796	-0.102533	0.044	0.17	0.0829482
chr1	189194595	189194688	7	0.72281	0.58114	0.141667	0.061	0.21	0.101058
chr1	189904432	189904534	9	0.50911	0.34026	0.168852	0.0097	0.047	0.0364044
chr1	190814546	190814588	5	0.68267	0.83807	-0.1554	0.0011	0.0019	0.0106429
chr1	192023968	192024031	5	0.7436	0.8566	-0.113	0.017	0.04	0.0486611
chr1	192330697	192330714	5	0.69033	0.80573	-0.1154	0.033	0.11	0.0706102
chr1	193971956	193972021	5	0.37487	0.497	-0.122133	0.16	0.36	0.184744
chr1	194489671	194489726	7	0.65681	0.75924	-0.102429	0.0029	0.031	0.0191201
chr1	194532594	194532627	5	0.668	0.78273	-0.114733	0.021	0.066	0.0544314
chr1	194837592	194837642	7	0.7069	0.81681	-0.109905	0.09	0.047	0.129167
chr1	195272963	195273031	5	0.70027	0.59333	0.106933	0.27	0.49	0.280797
chr1	195321221	195321257	5	0.347	0.45693	-0.109933	0.011	0.066	0.0386271
chr1	197754581	197754707	5	0.69273	0.79347	-0.100733	0.093	0.17	0.12948
chr1	198796750	198796765	5	0.5708	0.71607	-0.145267	0.0058	0.0038	0.027636
chr1	199998327	199998462	22	0.6877	0.91647	-0.228773	4.2e-14	2.3e-19	1.03333e-11
chr1	199998611	199998671	5	0.96367	0.85773	0.105933	0.065	0.16	0.104005
chr1	200004856	200004909	5	0.85527	0.9588	-0.103533	0.033	0.11	0.0706102
chr1	200010631	200010669	5	0.7318	0.83847	-0.106667	0.059	0.24	0.0979646
chr1	200300369	200300458	5	0.58053	0.37987	0.200667	0.019	0.023	0.0517666
chr1	200324542	200324590	5	0.76393	0.6578	0.106133	0.15	0.48	0.177332
chr1	200889031	200889387	5	0.89567	0.79407	0.1016	0.0075	0.0071	0.0313342
chr1	200992149	200992210	5	0.47133	0.6418	-0.170467	0.24	0.36	0.255127
chr1	200992324	200992340	5	0.5836	0.68413	-0.100533	0.21	0.65	0.229403
chr1	201084044	201084064	5	0.76007	0.45673	0.303333	0.00098	0.0019	0.010093
chr1	201306296	201306329	5	0.77973	0.90973	-0.13	0.0013	0.023	0.0117219
chr1	201355180	201355485	5	0.53387	0.65587	-0.122	0.14	0.24	0.169624
chr1	201619816	201619901	7	0.44657	0.54933	-0.102762	0.068	0.019	0.108347
chr1	201740290	201740353	5	0.75627	0.88187	-0.1256	0.25	0.64	0.262712
chr1	202081353	202081620	5	0.32687	0.46747	-0.1406	0.093	0.17	0.12948
chr1	202093836	202094092	5	0.39133	0.49347	-0.102133	0.24	0.64	0.255127
chr1	202163342	202163439	5	0.73847	0.62713	0.111333	0.15	0.35	0.177332
chr1	202163598	202163630	5	0.74973	0.85093	-0.1012	0.014	0.041	0.044522
chr1	202214296	202214343	5	0.77373	0.66693	0.1068	0.054	0.16	0.0931656
chr1	202612088	202612132	5	0.3306	0.56707	-0.236467	0.024	0.066	0.0590008
chr1	202612696	202612727	5	0.34507	0.24153	0.103533	0.054	0.069	0.0931656
chr1	202940370	202940457	5	0.42173	0.31613	0.1056	0.27	0.63	0.280797
chr1	202995341	202995425	5	0.38307	0.256	0.127067	0.16	0.36	0.184744
chr1	203162983	203163010	5	0.79173	0.93673	-0.145	0.011	0.11	0.0386271
chr1	203242676	203242740	5	0.4122	0.67547	-0.263267	0.093	0.11	0.12948
chr1	203284838	203284969	9	0.24611	0.36126	-0.115148	0.1	0.13	0.134759
chr1	204048388	204048512	5	0.63733	0.52327	0.114067	0.049	0.11	0.088355
chr1	204120949	204120964	5	0.29673	0.44067	-0.143933	0.0066	0.039	0.0294304
chr1	204219821	204219959	5	0.61647	0.5122	0.104267	0.15	0.36	0.177332
chr1	204328920	204329005	5	0.2984	0.14313	0.155267	0.0039	0.04	0.0220782
chr1	204334081	204334208	5	0.576	0.46867	0.107333	0.37	0.64	0.373616
chr1	204399816	204399848	8	0.54042	0.66858	-0.128167	0.0018	0.00052	0.0144785
chr1	204531696	204531735	5	0.87313	0.98733	-0.1142	4.4e-05	1.5e-05	0.00105573
chr1	204827138	204827200	5	0.86987	0.73653	0.133333	0.0066	0.014	0.0294304
chr1	205000763	205001026	5	0.54953	0.65393	-0.1044	0.24	0.36	0.255127
chr1	205012472	205012570	5	0.475	0.60107	-0.126067	0.071	0.066	0.109797
chr1	205313234	205313250	7	0.66514	0.77457	-0.109429	0.036	0.21	0.0735275
chr1	205498571	205498589	5	0.2856	0.16147	0.124133	0.054	0.17	0.0931656
chr1	205512663	205512895	12	0.3215	0.4325	-0.111	0.0034	0.0012	0.0209136
chr1	205818526	205818899	7	0.80262	0.69043	0.11219	0.12	0.29	0.15276
chr1	206222828	206222845	5	0.3456	0.44827	-0.102667	0.18	0.16	0.20362
chr1	206687070	206687132	5	0.324	0.4466	-0.1226	0.033	0.041	0.0706102
chr1	206798325	206798371	5	0.4906	0.64047	-0.149867	0.003	0.066	0.0191201
chr1	206950529	206950570	5	0.26147	0.43173	-0.170267	0.003	0.039	0.0191201
chr1	207226776	207227100	12	0.45217	0.55342	-0.10125	0.0021	0.0057	0.0159951
chr1	207842752	207842806	5	0.6496	0.74967	-0.100067	0.059	0.17	0.0979646
chr1	207852434	207852591	5	0.75293	0.8698	-0.116867	0.021	0.07	0.0544314
chr1	207910740	207910781	5	0.6412	0.76693	-0.125733	0.054	0.065	0.0931656
chr1	208399727	208399948	5	0.72393	0.8244	-0.100467	0.21	0.16	0.229403
chr1	208910263	208910327	6	0.73756	0.56272	0.174833	0.0033	0.057	0.0207253
chr1	210072144	210072185	5	0.7208	0.82607	-0.105267	0.044	0.11	0.0829482
chr1	210856149	210856174	5	0.69747	0.5938	0.103667	0.13	0.35	0.161045
chr1	210954155	210954172	5	0.4514	0.6264	-0.175	0.029	0.24	0.0650695
chr1	211415883	211416007	5	0.67513	0.79987	-0.124733	0.14	0.1	0.169624
chr1	212029213	212029465	5	0.86853	0.74733	0.1212	0.11	0.17	0.144028
chr1	212780280	212780393	27	0.35084	0.5182	-0.167358	9.5e-09	1.3e-06	6.21308e-07
chr1	212951976	212952022	5	0.8172	0.9334	-0.1162	0.11	0.35	0.144028
chr1	213103059	213103106	5	0.4212	0.58833	-0.167133	0.0015	0.013	0.012931
chr1	214158993	214159037	5	0.46627	0.32813	0.138133	0.0026	0.024	0.0176522
chr1	214159586	214159610	5	0.68947	0.5738	0.115667	0.024	0.072	0.0590008
chr1	217262915	217263008	5	0.63447	0.4668	0.167667	0.0039	0.0069	0.0220782
chr1	217805290	217805354	5	0.36153	0.46293	-0.1014	0.11	0.35	0.144028
chr1	217828146	217828211	5	0.5366	0.66727	-0.130667	0.14	0.35	0.169624
chr1	218337501	218337822	14	0.51202	0.73702	-0.225	7.1e-09	8.4e-08	4.74353e-07
chr1	218337991	218338049	5	0.5474	0.68067	-0.133267	0.14	0.024	0.169624
chr1	218338174	218338568	25	0.77432	0.78673	0.1342	0.012	0.0071	0.0399656
chr1	218338570	218338606	5	0.73813	0.841	-0.102867	0.00024	0.0019	0.003875
chr1	218338717	218338912	14	0.67233	0.79057	-0.134667	2.3e-06	8.9e-05	8.78079e-05
chr1	218444246	218444289	5	0.5026	0.36807	0.134533	0.049	0.35	0.088355
chr1	219347139	219347296	48	0.70895	0.84341	-0.134458	1.6e-11	1.6e-08	1.7971e-09
chr1	220285665	220285755	5	0.71107	0.92353	-0.212467	0.00098	0.00043	0.010093
chr1	220636242	220636344	5	0.5762	0.47127	0.104933	0.054	0.17	0.0931656
chr1	220863532	220863919	30	0.19	0.38483	-0.194833	4e-14	3e-15	1.03333e-11
chr1	221053089	221053356	18	0.49007	0.61596	-0.111389	0.0045	0.01	0.0238952
chr1	221053530	221053627	8	0.67812	0.80546	-0.127333	4.3e-06	0.00031	0.000151134
chr1	222792299	222792406	8	0.55267	0.68896	-0.136292	0.022	0.12	0.0569187
chr1	222817234	222817328	7	0.22486	0.48043	-0.255571	7.7e-07	3.2e-05	3.26986e-05
chr1	223537489	223537519	13	0.88241	0.79579	0.112143	0.00054	0.0077	0.00684383
chr1	223537521	223537554	14	0.8636	0.77507	0.1198	0.0035	0.00042	0.0209136
chr1	223537568	223537579	5	0.73433	0.60193	0.1324	0.017	0.11	0.0486611
chr1	223537738	223537802	17	0.87735	0.93298	-0.1164	0.015	0.066	0.0452071
chr1	223657180	223657279	5	0.45453	0.59933	-0.1448	0.16	0.35	0.184744
chr1	223936543	223936563	5	0.23367	0.3626	-0.128933	0.049	0.17	0.088355
chr1	223936961	223936989	5	0.52533	0.63467	-0.109333	0.12	0.066	0.15276
chr1	224537957	224537989	5	0.646	0.7496	-0.1036	0.011	0.065	0.0386271
chr1	224804641	224804663	5	0.5856	0.68793	-0.102333	0.16	0.11	0.184744
chr1	224804868	224804897	5	0.4032	0.2862	0.117	0.049	0.11	0.088355
chr1	224805129	224805199	5	0.66273	0.51147	0.151267	0.054	0.041	0.0931656
chr1	225455152	225455244	5	0.4708	0.57633	-0.105533	0.29	0.35	0.298711
chr1	225762330	225762430	8	0.54333	0.64521	-0.101875	0.0088	0.059	0.0347693
chr1	226005559	226005653	5	0.4158	0.56213	-0.146333	0.12	0.36	0.15276
chr1	226133130	226133453	5	0.7758	0.67427	0.101533	0.49	0.91	0.49076
chr1	226505364	226505411	5	0.23487	0.42147	-0.1866	0.012	0.066	0.0399656
chr1	226737021	226737131	5	0.77053	0.90787	-0.137333	0.0017	0.0037	0.0137097
chr1	226737731	226737779	5	0.52553	0.72073	-0.1952	0.059	0.35	0.0979646
chr1	226926082	226926100	5	0.39467	0.53673	-0.142067	0.012	0.11	0.0399656
chr1	227167467	227167766	5	0.88473	0.77387	0.110867	0.065	0.16	0.104005
chr1	227587738	227587817	5	0.80413	0.7012	0.102933	0.078	0.35	0.116508
chr1	227867576	227867621	5	0.27087	0.3884	-0.117533	0.19	0.35	0.210824
chr1	228074802	228074863	13	0.68241	0.49987	0.182538	5.3e-06	1.8e-05	0.000181748
chr1	228159444	228159451	5	0.28767	0.43767	-0.15	0.15	0.48	0.177332
chr1	228159468	228160138	30	0.70179	0.73084	-0.13	0.078	0.35	0.116508
chr1	228160415	228160489	5	0.69447	0.8736	-0.179133	0.0026	0.041	0.0176522
chr1	228195014	228195027	8	0.52842	0.6315	-0.103083	0.019	0.027	0.0517666
chr1	228196431	228196510	9	0.23396	0.36822	-0.134259	0.00068	0.033	0.00819596
chr1	228197038	228197110	5	0.66253	0.779	-0.116467	0.019	0.1	0.0517666
chr1	228341386	228341444	5	0.9354	0.74907	0.186333	0.033	0.065	0.0706102
chr1	228346363	228346380	6	0.69417	0.80811	-0.113944	0.027	0.13	0.0635246
chr1	228350773	228350842	5	0.3932	0.51887	-0.125667	0.24	0.35	0.255127
chr1	228381357	228381402	7	0.7601	0.86933	-0.109238	0.0063	0.0077	0.0294304
chr1	228394218	228394346	7	0.56667	0.69995	-0.133286	0.0006	0.0045	0.00753036
chr1	228539799	228539831	5	0.72273	0.861	-0.138267	0.033	0.068	0.0706102
chr1	228554821	228554902	5	0.76573	0.88753	-0.1218	0.024	0.1	0.0590008
chr1	228658544	228658635	5	0.56647	0.6886	-0.122133	0.093	0.16	0.12948
chr1	228672695	228672888	5	0.55693	0.67447	-0.117533	0.071	0.072	0.109797
chr1	228755177	228755223	16	0.68879	0.59365	0.150333	0.00071	0.00067	0.00827279
chr1	228755461	228755509	13	0.89451	0.79428	0.109133	0.0039	0.0018	0.0220782
chr1	228758887	228758896	5	0.86613	0.97887	-0.112733	0.0023	0.007	0.0166979
chr1	228764109	228764125	5	0.54027	0.64413	-0.103867	0.054	0.16	0.0931656
chr1	228766208	228766225	5	0.4262	0.54293	-0.116733	0.011	0.065	0.0386271
chr1	228766225	228766232	5	0.4422	0.554	-0.1118	0.0045	0.039	0.0238952
chr1	228766351	228766367	5	0.59827	0.48993	0.108333	0.13	0.35	0.161045
chr1	228766370	228766381	5	0.7332	0.60067	0.132533	0.012	0.065	0.0399656
chr1	228772661	228773048	48	0.45185	0.52101	-0.106708	0.0054	0.056	0.0268441
chr1	228781557	228781622	5	0.90827	0.7904	0.117867	0.00053	0.013	0.00673361
chr1	229265229	229265417	5	0.81707	0.9206	-0.103533	0.014	0.023	0.044522
chr1	229542867	229542945	5	0.83347	0.727	0.106467	0.16	0.48	0.184744
chr1	229543956	229544086	5	0.57927	0.7176	-0.138333	0.11	0.35	0.144028
chr1	229567551	229567626	7	0.78062	0.88286	-0.102238	0.034	0.02	0.0724399
chr1	229569706	229569779	5	0.61533	0.4858	0.129533	0.15	0.35	0.177332
chr1	229704506	229704634	5	0.69627	0.814	-0.117733	0.026	0.16	0.0614142
chr1	230241898	230242157	5	0.49027	0.59987	-0.1096	0.25	0.35	0.262712
chr1	230250287	230250356	5	0.051067	0.15733	-0.106267	0.0075	0.065	0.0313342
chr1	230561495	230561508	5	0.96873	0.8352	0.133533	0.011	0.04	0.0386271
chr1	231296405	231296506	7	0.68238	0.78757	-0.10519	0.013	0.072	0.0429546
chr1	231303277	231303314	5	0.52827	0.63113	-0.102867	0.25	0.64	0.262712
chr1	231530269	231530337	5	0.16	0.35953	-0.199533	0.04	0.1	0.0784711
chr1	231762759	231762774	5	0.89853	0.72487	0.173667	0.0013	0.023	0.0117219
chr1	232485519	232485622	5	0.793	0.9394	-0.1464	0.024	0.065	0.0590008
chr1	232765050	232765111	5	0.21007	0.38413	-0.174067	6.3e-05	8.4e-05	0.00140504
chr1	232870813	232870870	6	0.30461	0.43506	-0.130444	0.13	0.19	0.161045
chr1	234367046	234367106	5	0.774	0.8874	-0.1134	0.033	0.039	0.0706102
chr1	234403774	234403801	5	0.81713	0.93067	-0.113533	0.0013	0.0069	0.0117219
chr1	234626113	234626374	5	0.69093	0.82793	-0.137	0.13	0.35	0.161045
chr1	234952510	234952688	5	0.75973	0.86173	-0.102	0.21	0.17	0.229403
chr1	235035400	235035418	5	0.6526	0.7654	-0.1128	0.0051	0.007	0.0255577
chr1	235267724	235267807	15	0.6462	0.87196	-0.225756	5.4e-06	0.0022	0.000183553
chr1	235567545	235567587	5	0.20993	0.31293	-0.103	0.065	0.35	0.104005
chr1	235805557	235805594	5	0.29047	0.40253	-0.112067	0.13	0.066	0.161045
chr1	235812466	235812587	5	0.4916	0.61147	-0.119867	0.18	0.16	0.20362
chr1	235812592	235812667	5	0.42833	0.581	-0.152667	0.13	0.35	0.161045
chr1	236220527	236220804	5	0.73467	0.8556	-0.120933	0.11	0.066	0.144028
chr1	236323243	236323559	5	0.75247	0.86127	-0.1088	0.071	0.25	0.109797
chr1	236444776	236444826	7	0.46676	0.181	0.285762	0.00031	0.0026	0.00462464
chr1	236687222	236687231	5	0.51807	0.62607	-0.108	0.0075	0.0036	0.0313342
chr1	236687258	236687282	5	0.69387	0.37333	0.320533	0.0015	0.00092	0.012931
chr1	236687339	236687516	24	0.49265	0.65629	-0.163639	1.9e-06	2.6e-05	7.41814e-05
chr1	236954161	236954207	5	0.57453	0.67827	-0.103733	0.16	0.36	0.184744
chr1	237238937	237238981	5	0.56393	0.6704	-0.106467	0.033	0.24	0.0706102
chr1	238068326	238068382	5	0.6568	0.87007	-0.213267	0.017	0.025	0.0486611
chr1	238280484	238280516	5	0.16927	0.27533	-0.106067	0.0084	0.039	0.0334963
chr1	238290411	238290428	5	0.4626	0.5738	-0.1112	0.065	0.24	0.104005
chr1	238634768	238634860	5	0.56433	0.69727	-0.132933	0.029	0.068	0.0650695
chr1	238781027	238781042	5	0.66173	0.5452	0.116533	0.021	0.023	0.0544314
chr1	239412952	239413128	10	0.6382	0.77693	-0.138733	0.0033	0.027	0.0207253
chr1	240044410	240044499	7	0.50314	0.37333	0.12981	0.054	0.0075	0.0931656
chr1	240244470	240244562	5	0.55853	0.68193	-0.1234	0.093	0.023	0.12948
chr1	240710565	240710582	5	0.37	0.4784	-0.1084	0.19	0.16	0.210824
chr1	240775146	240775167	5	0.7928	0.90707	-0.114267	0.059	0.067	0.0979646
chr1	241096284	241096340	5	0.5694	0.73607	-0.166667	0.015	0.065	0.0452071
chr1	241292737	241292828	5	0.766	0.61967	0.146333	0.019	0.11	0.0517666
chr1	241985575	241985682	5	0.8162	0.9168	-0.1006	0.13	0.35	0.161045
chr1	242638584	242638641	6	0.41022	0.51172	-0.1015	0.018	0.022	0.0512868
chr1	242970305	242970313	5	0.30467	0.1736	0.131067	0.00028	0.0019	0.00425908
chr1	243053934	243053966	5	0.64267	0.77787	-0.1352	0.12	0.07	0.15276
chr1	243075562	243075575	5	0.79547	0.6796	0.115867	0.014	0.065	0.044522
chr1	243120082	243120567	19	0.72458	0.66884	0.128533	0.078	0.25	0.116508
chr1	243907807	243907849	5	0.82793	0.7008	0.127133	0.054	0.065	0.0931656
chr1	244012829	244012949	6	0.73506	0.85206	-0.117	0.0079	0.088	0.0327845
chr1	244013350	244013366	5	0.22507	0.39307	-0.168	0.065	0.039	0.104005
chr1	244162933	244163024	5	0.4812	0.59787	-0.116667	0.24	0.64	0.255127
chr1	244777292	244777570	5	0.77333	0.8864	-0.113067	0.16	0.066	0.184744
chr1	244787474	244787536	5	0.8492	0.68087	0.168333	0.0035	0.0009	0.0209136
chr1	245068030	245068070	5	0.85713	0.95827	-0.101133	0.003	0.0019	0.0191201
chr1	245077610	245077674	5	0.58567	0.8346	-0.248933	0.0023	0.039	0.0166979
chr1	245318652	245318840	28	0.18346	0.29117	-0.107702	1.5e-12	1.4e-07	2.05752e-10
chr1	245320180	245320514	30	0.32751	0.5099	-0.182389	5.4e-08	1.1e-05	2.96809e-06
chr1	245393900	245393937	5	0.76827	0.66793	0.100333	0.13	0.35	0.161045
chr1	245466690	245466722	5	0.68467	0.5546	0.130067	0.024	0.1	0.0590008
chr1	245738290	245738357	5	0.6976	0.84787	-0.150267	0.054	0.11	0.0931656
chr1	245970071	245970128	11	0.75824	0.86421	-0.10597	0.011	0.14	0.0386271
chr1	246165587	246165647	5	0.68607	0.82067	-0.1346	0.026	0.065	0.0614142
chr1	246470963	246470973	5	0.7376	0.49287	0.244733	0.0075	0.04	0.0313342
chr1	246887386	246887697	65	0.60862	0.71088	-0.102267	2.6e-10	7.6e-07	2.2514e-08
chr1	246887868	246887924	5	0.68593	0.80233	-0.1164	0.011	0.023	0.0386271
chr1	247156431	247156634	12	0.40694	0.52889	-0.121944	0.00011	0.0061	0.0021859
chr1	247171234	247171299	5	0.30727	0.423	-0.115733	0.0026	0.023	0.0176522
chr1	247290002	247290109	13	0.55015	0.82133	-0.271179	1.5e-09	1.9e-06	1.13415e-07
chr1	247290131	247290138	5	0.39913	0.50593	-0.1068	0.029	0.023	0.0650695
chr1	247290201	247290244	12	0.39217	0.48556	-0.103067	0.024	0.065	0.0590008
chr1	247335223	247335304	10	0.46967	0.2785	0.191167	0.0039	4.1e-05	0.0220782
chr1	247496058	247496157	8	0.52033	0.66612	-0.145792	0.00072	0.04	0.00827279
chr1	247536005	247536017	5	0.368	0.24513	0.122867	0.024	0.067	0.0590008
chr1	247597612	247597625	5	0.48847	0.60347	-0.115	0.033	0.16	0.0706102
chr1	247681400	247681440	5	0.60007	0.71873	-0.118667	0.017	0.023	0.0486611
chr1	248099832	248099872	5	0.23373	0.34467	-0.110933	0.029	0.025	0.0650695
chr1	248247641	248247694	5	0.3002	0.411	-0.1108	0.015	0.066	0.0452071
chr1	248335522	248335575	5	0.339	0.44393	-0.104933	0.071	0.11	0.109797
chr1	248839883	248839997	12	0.52206	0.62956	-0.1075	0.17	0.14	0.195911
chr1	248906146	248906216	5	0.72147	0.53707	0.1844	0.1	0.24	0.134759
chr10	94797	94819	5	0.6788	0.5666	0.1122	0.18	0.36	0.20362
chr10	120091	120252	23	0.30165	0.4102	-0.108551	0.0019	0.0006	0.0151804
chr10	122386	122536	6	0.78806	0.68428	0.103778	0.094	0.088	0.130485
chr10	161081	161110	5	0.53573	0.659	-0.123267	0.014	0.014	0.044522
chr10	182297	182365	13	0.22269	0.32415	-0.101462	0.009	0.042	0.0355414
chr10	396946	396952	5	0.80393	0.90747	-0.103533	0.014	0.024	0.044522
chr10	405327	405381	5	0.56727	0.67153	-0.104267	0.093	0.25	0.12948
chr10	410425	410442	5	0.5754	0.73593	-0.160533	0.015	0.0074	0.0452071
chr10	432218	432287	6	0.5735	0.4005	0.173	0.018	0.13	0.0512868
chr10	440719	440895	5	0.57213	0.67693	-0.1048	0.017	0.023	0.0486611
chr10	445089	445115	5	0.3172	0.4312	-0.114	0.13	0.16	0.161045
chr10	466337	466380	5	0.50087	0.39347	0.1074	0.44	0.65	0.441538
chr10	527751	527812	5	0.54093	0.64967	-0.108733	0.27	0.48	0.280797
chr10	622007	622044	5	0.54867	0.66093	-0.112267	0.093	0.066	0.12948
chr10	685748	685846	5	0.23673	0.36247	-0.125733	0.18	0.49	0.20362
chr10	685878	685920	5	0.63273	0.53267	0.100067	0.14	0.17	0.169624
chr10	686241	686406	5	0.21433	0.37327	-0.158933	0.036	0.1	0.0735275
chr10	735692	735733	10	0.56303	0.6886	-0.125567	0.011	0.038	0.0386271
chr10	766134	766404	5	0.1222	0.2404	-0.1182	0.036	0.1	0.0735275
chr10	818923	819084	5	0.62987	0.49033	0.139533	0.19	0.49	0.210824
chr10	823138	823299	11	0.70785	0.58879	0.119061	0.0072	0.1	0.0313342
chr10	824596	824650	5	0.68827	0.79167	-0.1034	0.033	0.16	0.0706102
chr10	1002145	1002386	9	0.74848	0.85311	-0.10463	0.0013	0.0065	0.0117219
chr10	1166428	1166682	7	0.85924	0.96838	-0.109143	0.0099	0.11	0.0369937
chr10	1218762	1218944	5	0.88087	0.7748	0.106067	0.017	0.11	0.0486611
chr10	1261381	1261488	5	0.4964	0.64853	-0.152133	0.014	0.068	0.044522
chr10	1262697	1262779	5	0.59747	0.729	-0.131533	0.017	0.16	0.0486611
chr10	1264705	1264756	7	0.83005	0.94129	-0.111238	0.00028	0.0015	0.00425908
chr10	1449589	1449814	8	0.55671	0.68929	-0.132583	1.5e-05	0.00054	0.000432156
chr10	1453461	1453527	9	0.80559	0.91263	-0.107037	0.24	0.3	0.255127
chr10	1476879	1477007	8	0.69912	0.59308	0.106042	0.066	0.29	0.105399
chr10	1516979	1517004	5	0.64487	0.50367	0.1412	0.012	0.023	0.0399656
chr10	1521590	1521604	5	0.7116	0.565	0.1466	0.059	0.35	0.0979646
chr10	1549111	1549180	5	0.52153	0.65253	-0.131	0.059	0.35	0.0979646
chr10	1550745	1550803	5	0.65107	0.75607	-0.105	0.04	0.023	0.0784711
chr10	1558024	1558312	5	0.52767	0.4234	0.104267	0.1	0.35	0.134759
chr10	1586644	1586716	7	0.77781	0.65595	0.121857	0.051	0.21	0.0915672
chr10	1593938	1594005	5	0.61473	0.46833	0.1464	0.054	0.11	0.0931656
chr10	1604251	1604357	5	0.5224	0.6276	-0.1052	0.015	0.11	0.0452071
chr10	1636252	1636534	5	0.45633	0.64353	-0.1872	3.1e-05	3.6e-05	0.000785131
chr10	1638893	1639016	5	0.4382	0.65513	-0.216933	0.0011	0.023	0.0106429
chr10	1651293	1651300	5	0.39713	0.55827	-0.161133	0.04	0.039	0.0784711
chr10	1669220	1669302	5	0.79013	0.923	-0.132867	0.0095	0.024	0.035697
chr10	1686130	1686198	5	0.49253	0.5928	-0.100267	0.029	0.039	0.0650695
chr10	1686277	1686452	8	0.51575	0.67671	-0.160958	0.0032	0.0043	0.0202119
chr10	1686469	1686534	5	0.39967	0.50753	-0.107867	0.071	0.16	0.109797
chr10	1716058	1716310	5	0.6578	0.5534	0.1044	0.12	0.023	0.15276
chr10	1724696	1724819	7	0.63967	0.50562	0.134048	0.0068	0.031	0.0301401
chr10	1749432	1749615	13	0.44703	0.60418	-0.157154	8.9e-06	0.0096	0.000279817
chr10	1774913	1774959	10	0.49147	0.37627	0.1152	0.017	0.18	0.0486611
chr10	1893421	1893549	5	0.635	0.75847	-0.123467	0.011	0.039	0.0386271
chr10	2317129	2317162	5	0.83287	0.71373	0.119133	0.015	0.0069	0.0452071
chr10	2531448	2531519	5	0.64293	0.75127	-0.108333	0.0026	0.002	0.0176522
chr10	2568178	2568400	7	0.63757	0.46486	0.172714	0.0012	0.0014	0.0114957
chr10	2685524	2685626	5	0.3948	0.51053	-0.115733	0.15	0.065	0.177332
chr10	2722304	2722607	6	0.50811	0.61911	-0.111	0.15	0.13	0.177332
chr10	2775837	2775899	5	0.70987	0.81167	-0.1018	0.00053	0.0037	0.00673361
chr10	3023656	3023779	8	0.75012	0.88412	-0.134	0.02	0.026	0.0541769
chr10	3139066	3139098	5	0.47013	0.58633	-0.1162	0.13	0.36	0.161045
chr10	3330347	3330444	9	0.41289	0.56419	-0.151296	0.065	0.3	0.104005
chr10	3466788	3466849	5	0.4788	0.60347	-0.124667	0.093	0.1	0.12948
chr10	5071671	5071767	5	0.5338	0.67293	-0.139133	0.044	0.11	0.0829482
chr10	5241559	5241610	7	0.6931	0.57662	0.116476	0.058	0.2	0.0979646
chr10	5287488	5287623	16	0.50281	0.56463	-0.112133	0.021	0.16	0.0544314
chr10	5625680	5625833	5	0.6836	0.81773	-0.134133	0.029	0.1	0.0650695
chr10	5882319	5882401	5	0.42993	0.6562	-0.226267	0.044	0.17	0.0829482
chr10	5991144	5991336	7	0.62943	0.75481	-0.125381	0.026	0.1	0.0614142
chr10	6175085	6175150	5	0.19393	0.31647	-0.122533	0.065	0.35	0.104005
chr10	6243410	6243435	5	0.71313	0.84007	-0.126933	0.065	0.1	0.104005
chr10	6417183	6417312	9	0.25385	0.35437	-0.100519	0.039	0.029	0.0784711
chr10	6489140	6489226	7	0.22095	0.33029	-0.109333	0.0047	0.03	0.0247789
chr10	6621074	6621368	10	0.34107	0.46147	-0.1204	0.0038	0.051	0.0220782
chr10	6674361	6674701	5	0.5782	0.37773	0.200467	0.033	0.023	0.0706102
chr10	7451524	7451844	21	0.75913	0.6839	0.110619	0.0016	0.048	0.0135742
chr10	7451934	7452033	5	0.61767	0.71867	-0.101	0.036	0.1	0.0735275
chr10	7618377	7618436	5	0.6088	0.72947	-0.120667	0.16	0.35	0.184744
chr10	7667449	7667532	5	0.6738	0.8082	-0.1344	0.00072	0.0018	0.00827279
chr10	7678798	7678849	5	0.31467	0.4322	-0.117533	0.085	0.35	0.122672
chr10	7708673	7708753	5	0.7108	0.8632	-0.1524	0.012	0.0071	0.0399656
chr10	7716064	7716120	5	0.3058	0.46207	-0.156267	0.036	0.1	0.0735275
chr10	8016803	8016834	5	0.5428	0.69993	-0.157133	1e-05	8.5e-05	0.00030572
chr10	8069710	8069764	5	0.52913	0.69133	-0.1622	0.015	0.023	0.0452071
chr10	8087695	8088068	9	0.44281	0.5447	-0.101889	0.021	0.23	0.0544314
chr10	8090437	8090697	5	0.6704	0.5694	0.101	0.25	0.35	0.262712
chr10	8092717	8092727	5	0.85373	0.7122	0.141533	0.04	0.25	0.0784711
chr10	8196427	8196506	5	0.65553	0.78733	-0.1318	0.0095	0.039	0.035697
chr10	8570693	8570754	5	0.50987	0.6134	-0.103533	0.059	0.039	0.0979646
chr10	9039858	9039995	8	0.50117	0.62113	-0.119958	0.012	0.081	0.0399656
chr10	9171661	9171692	5	0.35787	0.47713	-0.119267	0.00072	0.0069	0.00827279
chr10	9837669	9837722	5	0.68767	0.5836	0.104067	0.15	0.35	0.177332
chr10	10337375	10337437	5	0.75953	0.85987	-0.100333	0.033	0.066	0.0706102
chr10	10921013	10921367	5	0.63993	0.81	-0.170067	0.065	0.35	0.104005
chr10	11312555	11312576	5	0.87593	0.75767	0.118267	0.0045	0.0019	0.0238952
chr10	11315386	11315478	5	0.7462	0.84853	-0.102333	0.11	0.35	0.144028
chr10	11322267	11322354	5	0.84973	0.73547	0.114267	0.065	0.16	0.104005
chr10	11409823	11410028	5	0.8638	0.96553	-0.101733	0.029	0.1	0.0650695
chr10	11784052	11784081	5	0.50913	0.61247	-0.103333	0.003	0.0074	0.0191201
chr10	11784542	11784631	12	0.73297	0.87339	-0.140417	3.9e-13	1.4e-12	6.045e-11
chr10	12027984	12028044	5	0.8704	0.76513	0.105267	0.12	0.24	0.15276
chr10	12028129	12028173	5	0.70747	0.82487	-0.1174	0.0066	0.023	0.0294304
chr10	12314003	12314034	7	0.83824	0.73533	0.102905	0.046	0.21	0.0862257
chr10	12387566	12387676	5	0.65213	0.7748	-0.122667	0.078	0.067	0.116508
chr10	12617144	12617247	5	0.7124	0.83467	-0.122267	0.16	0.16	0.184744
chr10	12892733	12892835	8	0.35892	0.52408	-0.165167	0.0088	0.0066	0.0347693
chr10	13043511	13043564	18	0.60954	0.79857	-0.189037	1.5e-09	5.6e-07	1.13415e-07
chr10	13168303	13168344	5	0.84473	0.69347	0.151267	0.015	0.066	0.0452071
chr10	13199762	13199823	7	0.69719	0.86514	-0.167952	0.0037	0.0077	0.0219396
chr10	13391958	13392146	20	0.44222	0.34005	0.102167	0.0014	0.02	0.0124856
chr10	13392154	13392271	5	0.50313	0.67967	-0.176533	0.0017	0.04	0.0137097
chr10	13425015	13425202	5	0.41867	0.5216	-0.102933	0.024	0.067	0.0590008
chr10	13570462	13570593	14	0.54298	0.8576	-0.314619	7.2e-13	1.5e-10	1.05283e-10
chr10	13933996	13934127	5	0.89633	0.79433	0.102	0.12	0.16	0.15276
chr10	14180202	14180441	5	0.71247	0.54673	0.165733	0.00039	9.9e-05	0.00541182
chr10	14851165	14851240	5	0.847	0.98333	-0.136333	0.0013	0.0018	0.0117219
chr10	15000755	15000820	6	0.56083	0.45994	0.100889	0.38	0.89	0.383663
chr10	15023039	15023908	34	0.59125	0.61692	-0.115944	0.25	0.49	0.262712
chr10	15299303	15299472	8	0.48996	0.36142	0.128542	0.0065	0.04	0.0294304
chr10	15340383	15340429	5	0.68227	0.5594	0.122867	0.0075	0.023	0.0313342
chr10	15390136	15390433	9	0.33767	0.49259	-0.154926	0.00059	0.015	0.00744101
chr10	15456714	15456769	5	0.5294	0.64247	-0.113067	0.015	0.039	0.0452071
chr10	15963621	15963688	5	0.5766	0.6834	-0.1068	0.12	0.24	0.15276
chr10	16951073	16951180	15	0.63987	0.74782	-0.107956	0.0034	0.043	0.0209136
chr10	16974995	16975118	5	0.5556	0.69553	-0.139933	0.054	0.48	0.0931656
chr10	17332799	17332971	5	0.39247	0.285	0.107467	0.059	0.16	0.0979646
chr10	18031877	18032204	13	0.53364	0.42041	0.113231	0.12	0.33	0.15276
chr10	18429036	18429129	5	0.81693	0.92213	-0.1052	0.00062	0.0018	0.00756693
chr10	18430359	18430604	5	0.84413	0.9744	-0.130267	0.0075	0.013	0.0313342
chr10	18791000	18791285	5	0.64293	0.74867	-0.105733	0.13	0.35	0.161045
chr10	18916486	18916646	17	0.64153	0.77457	-0.133039	4.7e-07	0.00025	2.0755e-05
chr10	19324047	19324136	13	0.57444	0.69938	-0.124949	0.00018	0.0024	0.00315254
chr10	19465689	19465872	5	0.81467	0.92387	-0.1092	0.078	0.17	0.116508
chr10	19718352	19718418	5	0.5688	0.6878	-0.119	0.071	0.36	0.109797
chr10	19782504	19782566	5	0.4666	0.6036	-0.137	0.12	0.48	0.15276
chr10	20104563	20104579	5	0.61973	0.73467	-0.114933	0.00098	0.00043	0.010093
chr10	20105024	20105188	14	0.45824	0.55648	-0.123048	0.024	0.048	0.0590008
chr10	20105423	20105436	5	0.6978	0.8366	-0.1388	0.0084	0.023	0.0334963
chr10	20106719	20106785	5	0.68067	0.78707	-0.1064	0.093	0.36	0.12948
chr10	20867638	20867730	7	0.39929	0.5051	-0.10581	0.011	0.031	0.0386271
chr10	21463669	21463689	5	0.55467	0.73193	-0.177267	0.003	0.007	0.0191201
chr10	21843529	21843610	5	0.74387	0.62933	0.114533	0.33	0.63	0.335586
chr10	22726060	22726112	6	0.38772	0.49839	-0.110667	0.031	0.19	0.0688593
chr10	22726145	22726154	5	0.24467	0.37847	-0.1338	0.0015	0.0037	0.012931
chr10	23448092	23448141	5	0.5032	0.62647	-0.123267	0.093	0.17	0.12948
chr10	23461528	23461581	5	0.5448	0.65007	-0.105267	0.42	0.65	0.422042
chr10	23480697	23480709	5	0.7544	0.55347	0.200933	0.00098	0.023	0.010093
chr10	23481296	23481501	5	0.59347	0.49133	0.102133	0.21	0.17	0.229403
chr10	23481918	23481952	5	0.79613	0.5592	0.236933	0.0045	0.025	0.0238952
chr10	23588861	23588894	5	0.3774	0.49553	-0.118133	0.0084	0.024	0.0334963
chr10	23728995	23729019	5	0.5398	0.3314	0.2084	0.0066	0.0072	0.0294304
chr10	23984776	23984824	5	0.63093	0.4376	0.193333	0.078	0.35	0.116508
chr10	24477804	24477816	5	0.41333	0.25773	0.1556	0.00084	0.0036	0.00909853
chr10	24547712	24547744	5	0.34753	0.23767	0.109867	0.1	0.11	0.134759
chr10	24582904	24582950	5	0.7334	0.6032	0.1302	0.033	0.17	0.0706102
chr10	24669749	24669855	5	0.6152	0.74087	-0.125667	0.19	0.64	0.210824
chr10	24686251	24686264	5	0.2382	0.089533	0.148667	0.0039	0.013	0.0220782
chr10	24857939	24857956	5	0.6316	0.5262	0.1054	0.16	0.5	0.184744
chr10	24944661	24944916	7	0.72276	0.86386	-0.141095	0.0092	0.013	0.035697
chr10	25241349	25241499	24	0.22157	0.37379	-0.152222	4.6e-11	2.1e-08	4.66013e-09
chr10	25464078	25464099	5	0.98053	0.86713	0.1134	0.04	0.066	0.0784711
chr10	25464183	25464287	7	0.52252	0.39143	0.131095	0.034	0.03	0.0724399
chr10	25476128	25476173	5	0.67673	0.78287	-0.106133	0.085	0.16	0.122672
chr10	25541595	25541828	7	0.58981	0.73914	-0.149333	0.061	0.28	0.101058
chr10	25618181	25618237	5	0.86787	0.70367	0.1642	0.0045	0.0037	0.0238952
chr10	26506320	26506482	5	0.30293	0.42767	-0.124733	0.011	0.04	0.0386271
chr10	26992785	26992827	5	0.6762	0.80213	-0.125933	0.18	0.35	0.20362
chr10	27194708	27194823	5	0.3894	0.52653	-0.137133	0.21	0.63	0.229403
chr10	27585755	27585821	5	0.55253	0.3328	0.219733	0.044	0.11	0.0829482
chr10	28749156	28749201	5	0.97013	0.85827	0.111867	0.0095	0.023	0.035697
chr10	28957481	28957507	5	0.70653	0.84973	-0.1432	0.0066	0.039	0.0294304
chr10	28957553	28957747	22	0.64073	0.77609	-0.135364	1.1e-07	8.4e-06	5.53571e-06
chr10	30034817	30034888	7	0.54052	0.67776	-0.137238	0.094	0.15	0.130485
chr10	31053809	31054146	5	0.81707	0.707	0.110067	0.31	0.35	0.317078
chr10	32039277	32039401	5	0.62173	0.72233	-0.1006	0.33	0.79	0.335586
chr10	32086960	32087155	18	0.8632	0.90859	-0.118778	0.058	0.19	0.0979646
chr10	32313317	32313362	5	0.67847	0.83707	-0.1586	0.019	0.16	0.0517666
chr10	33661747	33662092	6	0.77722	0.87733	-0.100111	0.082	0.19	0.121883
chr10	35257974	35258042	5	0.49207	0.38873	0.103333	0.18	0.17	0.20362
chr10	35271524	35271555	5	0.83673	0.6302	0.206533	0.0066	0.0071	0.0294304
chr10	35763052	35763136	5	0.31853	0.42507	-0.106533	0.16	0.1	0.184744
chr10	36013332	36013651	6	0.60694	0.72461	-0.117667	0.15	0.37	0.177332
chr10	36018524	36018549	5	0.894	0.78333	0.110667	0.15	0.64	0.177332
chr10	36520998	36521093	8	0.60671	0.47612	0.130583	0.17	0.16	0.195911
chr10	36993888	36994065	8	0.81342	0.92692	-0.1135	0.0028	0.018	0.018886
chr10	37298617	37298751	8	0.67813	0.80567	-0.127542	0.027	0.039	0.0635246
chr10	37395464	37395670	5	0.74033	0.60207	0.138267	0.15	0.49	0.177332
chr10	37413435	37413598	5	0.7302	0.61953	0.110667	0.16	0.35	0.184744
chr10	37414329	37414384	5	0.708	0.85147	-0.143467	0.044	0.065	0.0829482
chr10	37472823	37472873	9	0.68707	0.80744	-0.12037	0.014	0.22	0.044522
chr10	38078914	38079016	5	0.47227	0.57727	-0.105	0.47	0.49	0.471003
chr10	38163787	38163827	5	0.54653	0.72513	-0.1786	0.0095	0.11	0.035697
chr10	38186050	38186079	5	0.71667	0.5752	0.141467	0.026	0.0071	0.0614142
chr10	38691012	38691045	5	0.69873	0.58533	0.1134	0.059	0.35	0.0979646
chr10	38742831	38742857	5	0.2192	0.35513	-0.135933	0.024	0.023	0.0590008
chr10	42862854	42862861	5	0.62807	0.73233	-0.104267	0.15	0.36	0.177332
chr10	42922363	42922402	5	0.2464	0.36387	-0.117467	0.033	0.025	0.0706102
chr10	42971195	42971204	5	0.41273	0.26007	0.152667	0.00028	0.0038	0.00425908
chr10	43161407	43161566	5	0.2414	0.34593	-0.104533	0.071	0.35	0.109797
chr10	43248706	43248770	12	0.56069	0.67278	-0.112083	0.002	0.046	0.0153923
chr10	43249208	43249242	5	0.6272	0.45953	0.167667	0.12	0.16	0.15276
chr10	43250127	43250149	5	0.83653	0.71947	0.117067	0.15	0.24	0.177332
chr10	43274231	43274276	5	0.67027	0.81053	-0.140267	0.011	0.013	0.0386271
chr10	43274309	43274426	5	0.63813	0.79733	-0.1592	0.0051	0.023	0.0255577
chr10	43277850	43277874	5	0.42293	0.53113	-0.1082	0.044	0.16	0.0829482
chr10	43278004	43278033	5	0.41693	0.6922	-0.275267	0.00046	0.00042	0.00610445
chr10	43374131	43374184	5	0.583	0.38093	0.202067	0.012	0.007	0.0399656
chr10	43375110	43375403	5	0.28673	0.3954	-0.108667	0.18	0.35	0.20362
chr10	43429319	43429327	5	0.44367	0.57813	-0.134467	0.026	0.066	0.0614142
chr10	43487040	43487158	5	0.7096	0.842	-0.1324	0.16	0.35	0.184744
chr10	43541995	43542393	7	0.88481	0.76452	0.120286	0.048	0.38	0.088355
chr10	43596068	43596168	5	0.66393	0.7892	-0.125267	0.0058	0.023	0.027636
chr10	43600571	43600580	5	0.49707	0.6058	-0.108733	0.024	0.16	0.0590008
chr10	43724956	43724986	5	0.56793	0.38913	0.1788	0.21	0.48	0.229403
chr10	43724994	43725030	5	0.7014	0.43887	0.262533	0.024	0.04	0.0590008
chr10	43725035	43725072	5	0.71653	0.42247	0.294067	0.029	0.16	0.0650695
chr10	43833177	43833434	5	0.3344	0.197	0.1374	0.026	0.11	0.0614142
chr10	43842806	43842884	9	0.7703	0.88011	-0.109815	0.0047	0.047	0.0247789
chr10	43905999	43906094	6	0.75761	0.87506	-0.117444	0.1	0.19	0.134759
chr10	43918327	43918353	5	0.77673	0.89753	-0.1208	0.0045	0.023	0.0238952
chr10	43961134	43961308	8	0.66204	0.77333	-0.111292	0.11	0.29	0.144028
chr10	44069885	44069923	7	0.1229	0.37324	-0.250333	0.00031	0.0027	0.00462464
chr10	44163404	44163420	5	0.796	0.6744	0.1216	0.085	0.067	0.122672
chr10	44878560	44878908	7	0.59533	0.70252	-0.10719	0.4	0.37	0.402702
chr10	44894688	44894762	5	0.431	0.54093	-0.109933	0.00098	0.0019	0.010093
chr10	44997053	44997086	5	0.41693	0.5474	-0.130467	0.012	0.0019	0.0399656
chr10	45360218	45360260	5	0.5748	0.4596	0.1152	0.00098	0.0019	0.010093
chr10	45455465	45455685	7	0.56729	0.44905	0.118238	0.19	0.21	0.210824
chr10	45568854	45568904	5	0.37447	0.4804	-0.105933	0.044	0.11	0.0829482
chr10	45755435	45755519	5	0.88867	0.74287	0.1458	0.054	0.065	0.0931656
chr10	45799451	45799648	7	0.70948	0.60814	0.101333	0.13	0.38	0.161045
chr10	45869702	45869773	9	0.32963	0.62967	-0.300037	0.00025	3.4e-05	0.00400724
chr10	45870061	45870121	15	0.3158	0.42516	-0.109356	0.0024	0.038	0.0172222
chr10	45870125	45870139	5	0.36173	0.51227	-0.150533	0.012	0.039	0.0399656
chr10	45870154	45870221	5	0.20367	0.3334	-0.129733	0.11	0.35	0.144028
chr10	45886822	45886910	9	0.73744	0.86719	-0.129741	0.00077	0.00097	0.00880162
chr10	46174075	46174211	9	0.738	0.86167	-0.123667	0.14	0.22	0.169624
chr10	46299042	46299422	6	0.54844	0.65061	-0.102167	0.51	0.37	0.510725
chr10	46505441	46505533	5	0.492	0.33007	0.161933	0.11	0.17	0.144028
chr10	46640678	46640740	7	0.73486	0.85833	-0.123476	0.015	0.02	0.0452071
chr10	46640889	46640956	5	0.66927	0.8086	-0.139333	0.12	0.36	0.15276
chr10	46970677	46970759	5	0.76867	0.6484	0.120267	0.078	0.35	0.116508
chr10	46992929	46992995	5	0.84867	0.95327	-0.1046	0.024	0.023	0.0590008
chr10	46993721	46993760	5	0.65873	0.7726	-0.113867	0.015	0.041	0.0452071
chr10	47058191	47058533	8	0.30396	0.1655	0.138458	2.9e-06	0.00017	0.000107794
chr10	47179628	47180002	7	0.78667	0.88895	-0.102286	0.043	0.21	0.0829482
chr10	47616704	47616888	5	0.78087	0.9196	-0.138733	0.021	0.023	0.0544314
chr10	47654170	47654217	5	0.23127	0.49087	-0.2596	8.2e-06	1.5e-05	0.000259918
chr10	47668653	47668734	5	0.47387	0.60927	-0.1354	0.16	0.35	0.184744
chr10	47700987	47701202	5	0.68833	0.5792	0.109133	0.35	0.35	0.354668
chr10	47747866	47747947	5	0.3754	0.49087	-0.115467	0.19	0.11	0.210824
chr10	47769462	47769642	45	0.54267	0.70328	-0.160615	8.4e-11	6.1e-11	8.03704e-09
chr10	47966336	47966713	10	0.55837	0.4306	0.127767	0.18	0.13	0.20362
chr10	48277713	48277824	8	0.41175	0.628	-0.21625	0.00036	0.0003	0.00515235
chr10	48278024	48278055	5	0.45727	0.60307	-0.1458	0.026	0.013	0.0614142
chr10	48278055	48278177	5	0.4796	0.58147	-0.101867	0.065	0.35	0.104005
chr10	48437795	48437897	6	0.25506	0.44728	-0.192222	0.0065	0.022	0.0294304
chr10	48438538	48438570	5	0.44873	0.33593	0.1128	0.15	0.64	0.177332
chr10	48439222	48439262	5	0.855	0.7176	0.1374	0.065	0.023	0.104005
chr10	48827599	48827625	5	0.7852	0.91753	-0.132333	0.024	0.067	0.0590008
chr10	49086149	49086214	5	0.63113	0.74887	-0.117733	0.04	0.11	0.0784711
chr10	49458136	49458537	21	0.81605	0.86648	-0.151944	0.029	0.13	0.0650695
chr10	49812905	49812940	5	0.39253	0.51453	-0.122	0.14	0.24	0.169624
chr10	49899360	49899502	6	0.040833	0.14433	-0.1035	0.027	0.088	0.0635246
chr10	50181441	50181617	5	0.3962	0.5064	-0.1102	0.11	0.25	0.144028
chr10	50340220	50340269	5	0.43873	0.5406	-0.101867	0.25	0.36	0.262712
chr10	50383947	50384187	5	0.2608	0.38333	-0.122533	0.19	0.36	0.210824
chr10	50534274	50534329	12	0.36456	0.47944	-0.114889	0.12	0.27	0.15276
chr10	50603617	50603639	5	0.122	0.31293	-0.190933	0.00017	0.0018	0.00300114
chr10	50818068	50818299	5	0.46027	0.5702	-0.109933	0.078	0.16	0.116508
chr10	50818459	50818483	5	0.53833	0.66727	-0.128933	0.065	0.17	0.104005
chr10	51524157	51524211	5	0.75013	0.89153	-0.1414	0.033	0.16	0.0706102
chr10	51928806	51928883	5	0.636	0.76327	-0.127267	0.024	0.068	0.0590008
chr10	52751521	52751606	5	0.827	0.70367	0.123333	0.15	0.24	0.177332
chr10	52834064	52834093	5	0.85447	0.74	0.114467	0.085	0.17	0.122672
chr10	53021866	53021888	5	0.4892	0.60093	-0.111733	0.036	0.066	0.0735275
chr10	53388484	53388575	5	0.62367	0.50647	0.1172	0.071	0.24	0.109797
chr10	53578538	53578595	5	0.44707	0.32667	0.1204	0.25	0.48	0.262712
chr10	53644032	53644097	5	0.59173	0.7268	-0.135067	0.071	0.066	0.109797
chr10	53798563	53798884	7	0.57152	0.73767	-0.166143	0.00011	0.0046	0.0021859
chr10	53931722	53931813	5	0.72187	0.8234	-0.101533	0.015	0.023	0.0452071
chr10	54073642	54073724	5	0.42533	0.52993	-0.1046	0.085	0.069	0.122672
chr10	54081607	54081653	5	0.65913	0.78987	-0.130733	1.8e-05	8.4e-05	0.000497326
chr10	54503584	54503856	7	0.38667	0.50562	-0.118952	0.054	0.047	0.0931656
chr10	54565688	54565750	5	0.6172	0.73767	-0.120467	0.012	0.039	0.0399656
chr10	54694853	54695077	6	0.42928	0.57811	-0.148833	0.004	0.057	0.0225209
chr10	55111526	55111573	6	0.80467	0.68044	0.124222	0.016	0.036	0.0479134
chr10	55557502	55557545	7	0.35871	0.46629	-0.107571	0.051	0.2	0.0915672
chr10	55630814	55630822	5	0.49533	0.68153	-0.1862	0.0017	0.007	0.0137097
chr10	56511957	56512003	5	0.77527	0.66007	0.1152	0.085	0.11	0.122672
chr10	56679958	56679997	5	0.31567	0.21	0.105667	0.19	0.64	0.210824
chr10	57186117	57186321	7	0.39143	0.51219	-0.120762	0.08	0.49	0.119116
chr10	58406898	58406975	5	0.34407	0.24073	0.103333	0.25	0.64	0.262712
chr10	59081356	59081375	5	0.2802	0.1478	0.1324	0.093	0.35	0.12948
chr10	59866383	59866403	5	0.7164	0.5368	0.1796	0.054	0.11	0.0931656
chr10	59866496	59866531	5	0.57793	0.70313	-0.1252	0.033	0.1	0.0706102
chr10	60684199	60684305	5	0.66427	0.56	0.104267	0.18	0.16	0.20362
chr10	61315448	61315492	5	0.46653	0.60273	-0.1362	0.011	0.1	0.0386271
chr10	61469857	61469882	8	0.7475	0.85675	-0.10925	0.0061	0.011	0.0288087
chr10	63809097	63809149	5	0.6302	0.83713	-0.206933	0.0017	0.0037	0.0137097
chr10	64575633	64575694	5	0.7868	0.61027	0.176533	0.054	0.023	0.0931656
chr10	64708040	64708359	5	0.7082	0.57373	0.134467	0.27	0.63	0.280797
chr10	64793503	64793562	5	0.73133	0.6	0.131333	0.35	0.79	0.354668
chr10	64797304	64797354	5	0.81427	0.68547	0.1288	0.012	0.066	0.0399656
chr10	64852187	64852240	5	0.67607	0.82853	-0.152467	0.0075	0.04	0.0313342
chr10	65733114	65733164	5	0.37373	0.48533	-0.1116	0.14	0.36	0.169624
chr10	65733323	65733374	5	0.91667	0.79693	0.119733	0.14	0.35	0.169624
chr10	65801612	65801660	7	0.57548	0.46567	0.10981	0.04	0.11	0.0784711
chr10	66463607	66463735	5	0.47073	0.61	-0.139267	0.24	0.63	0.255127
chr10	66747227	66747312	5	0.30973	0.42633	-0.1166	0.049	0.17	0.088355
chr10	66814035	66814183	13	0.53515	0.61141	-0.1135	0.0065	0.013	0.0294304
chr10	66814183	66814201	7	0.56619	0.73029	-0.164095	1.8e-05	0.00025	0.000497326
chr10	68072537	68072582	5	0.40933	0.5282	-0.118867	0.1	0.17	0.134759
chr10	68840442	68840464	5	0.6496	0.76313	-0.113533	0.04	0.16	0.0784711
chr10	69858472	69858579	5	0.83187	0.96893	-0.137067	0.00015	0.00043	0.00275148
chr10	70041484	70041564	7	0.90838	0.7579	0.150476	0.00025	0.00085	0.00400724
chr10	70283144	70283332	5	0.8208	0.93907	-0.118267	0.11	0.16	0.144028
chr10	70321668	70321743	5	0.7522	0.859	-0.1068	0.11	0.065	0.144028
chr10	70359127	70359244	7	0.82048	0.93657	-0.116095	0.0054	0.02	0.0268441
chr10	70544497	70544925	25	0.91767	0.9332	0.1142	0.31	0.35	0.317078
chr10	70657872	70657904	5	0.52067	0.68633	-0.165667	0.078	0.35	0.116508
chr10	70853404	70853430	5	0.42027	0.55387	-0.1336	0.13	0.64	0.161045
chr10	70872913	70872970	5	0.87707	0.65727	0.2198	0.021	0.04	0.0544314
chr10	70873362	70873425	5	0.64727	0.79707	-0.1498	0.033	0.16	0.0706102
chr10	71044915	71044928	5	0.7976	0.6554	0.1422	0.00028	0.00098	0.00425908
chr10	71077881	71077955	5	0.35347	0.10367	0.2498	0.00084	0.0009	0.00909853
chr10	71173777	71173868	5	0.69913	0.7998	-0.100667	0.12	0.35	0.15276
chr10	71316122	71316190	5	0.31727	0.42087	-0.1036	0.11	0.48	0.144028
chr10	71328544	71328664	5	0.41873	0.53673	-0.118	0.12	0.24	0.15276
chr10	71333037	71333119	7	0.42871	0.55438	-0.125667	0.12	0.15	0.15276
chr10	71562050	71562071	5	0.3228	0.4454	-0.1226	0.04	0.16	0.0784711
chr10	71562253	71562391	37	0.45859	0.56339	-0.12185	0.011	0.049	0.0386271
chr10	71626820	71626955	5	0.68167	0.78193	-0.100267	0.19	0.48	0.210824
chr10	71626961	71627201	7	0.52714	0.71957	-0.192429	0.0012	0.0015	0.0114957
chr10	71654417	71654588	5	0.69787	0.57467	0.1232	0.11	0.17	0.144028
chr10	71701568	71701622	5	0.17847	0.30393	-0.125467	0.015	0.11	0.0452071
chr10	71703340	71703499	5	0.73693	0.6186	0.118333	0.19	0.35	0.210824
chr10	71813123	71813150	5	0.611	0.76153	-0.150533	0.029	0.023	0.0650695
chr10	71905332	71905432	15	0.42993	0.58164	-0.151711	8.6e-05	0.015	0.00180868
chr10	72141677	72141736	13	0.47862	0.63813	-0.159513	0.0025	0.093	0.0176522
chr10	72142913	72142938	5	0.46093	0.666	-0.205067	0.054	0.11	0.0931656
chr10	72218876	72218923	6	0.20028	0.30789	-0.107611	0.043	0.19	0.0829482
chr10	72431778	72431883	5	0.2784	0.16147	0.116933	0.11	0.25	0.144028
chr10	72512045	72512440	7	0.62767	0.52748	0.10019	0.16	0.1	0.184744
chr10	72647616	72647989	37	0.60219	0.72501	-0.12282	4.8e-07	8.7e-06	2.11364e-05
chr10	72973329	72973403	5	0.14273	0.28227	-0.139533	0.0026	0.007	0.0176522
chr10	72973408	72973850	36	0.58424	0.63192	-0.11	0.19	0.19	0.210824
chr10	73031958	73032020	5	0.7526	0.6496	0.103	0.14	0.48	0.169624
chr10	73039038	73039081	5	0.75627	0.8758	-0.119533	0.015	0.069	0.0452071
chr10	73062103	73062124	5	0.44473	0.61047	-0.165733	0.044	0.24	0.0829482
chr10	73137008	73137070	7	0.078571	0.204	-0.125429	0.00023	0.0077	0.00382101
chr10	73408370	73408451	5	0.5944	0.48193	0.112467	0.15	0.17	0.177332
chr10	73417923	73417996	5	0.69553	0.80713	-0.1116	0.011	0.023	0.0386271
chr10	73464462	73464679	5	0.44193	0.6024	-0.160467	0.029	0.24	0.0650695
chr10	73548817	73548916	5	0.39347	0.5198	-0.126333	0.18	0.36	0.20362
chr10	73549971	73550110	7	0.48224	0.59671	-0.114476	0.16	0.21	0.184744
chr10	73609348	73609405	5	0.48907	0.62847	-0.1394	0.044	0.25	0.0829482
chr10	73629957	73629984	5	0.726	0.8396	-0.1136	0.054	0.065	0.0931656
chr10	73823466	73823741	5	0.46767	0.34953	0.118133	0.24	0.63	0.255127
chr10	73835679	73835803	5	0.90293	0.78967	0.113267	0.059	0.17	0.0979646
chr10	74031612	74031673	5	0.58353	0.475	0.108533	0.33	0.63	0.335586
chr10	74083780	74083901	5	0.73387	0.613	0.120867	0.15	0.64	0.177332
chr10	74094796	74094871	5	0.23973	0.34747	-0.107733	0.024	0.023	0.0590008
chr10	74100239	74100335	6	0.2695	0.40778	-0.138278	0.15	0.27	0.177332
chr10	75137251	75137314	5	0.82527	0.95933	-0.134067	0.026	0.023	0.0614142
chr10	75385786	75385811	5	0.39573	0.25093	0.1448	0.002	0.023	0.0153923
chr10	75489018	75489044	5	0.12747	0.25413	-0.126667	0.024	0.066	0.0590008
chr10	75621301	75621405	8	0.36608	0.22704	0.139042	0.16	0.12	0.184744
chr10	75893861	75893891	5	0.72573	0.58667	0.139067	0.054	0.11	0.0931656
chr10	76803449	76803495	5	0.19047	0.3036	-0.113133	0.15	0.24	0.177332
chr10	76966558	76966608	6	0.83317	0.93917	-0.106	0.0065	0.0013	0.0294304
chr10	76998001	76998201	5	0.68987	0.78993	-0.100067	0.15	0.17	0.177332
chr10	77093794	77093897	5	0.82013	0.70647	0.113667	0.033	0.11	0.0706102
chr10	77098816	77098937	5	0.74113	0.84807	-0.106933	0.021	0.066	0.0544314
chr10	77472165	77472227	5	0.4536	0.5786	-0.125	0.21	0.64	0.229403
chr10	77517969	77518065	5	0.70767	0.58847	0.1192	0.054	0.067	0.0931656
chr10	77599611	77599628	5	0.669	0.77867	-0.109667	0.059	0.066	0.0979646
chr10	77974323	77974398	5	0.45087	0.6288	-0.177933	0.065	0.25	0.104005
chr10	78360178	78360224	5	0.62947	0.52747	0.102	0.29	0.49	0.298711
chr10	78882762	78882893	5	0.7388	0.6116	0.1272	0.036	0.16	0.0735275
chr10	79978691	79978753	5	0.49733	0.37193	0.1254	0.071	0.11	0.109797
chr10	80037827	80037850	5	0.50207	0.3834	0.118667	0.054	0.16	0.0931656
chr10	80070918	80071008	7	0.71257	0.6079	0.104667	0.072	0.15	0.111144
chr10	80110984	80111070	5	0.39613	0.273	0.123133	0.065	0.11	0.104005
chr10	80712687	80712968	5	0.5772	0.7148	-0.1376	0.11	0.36	0.144028
chr10	80999779	80999796	7	0.56595	0.74757	-0.181619	0.0043	0.0046	0.0238952
chr10	81206367	81206436	7	0.62671	0.73652	-0.10981	0.25	0.38	0.262712
chr10	81300292	81300341	5	0.73193	0.83447	-0.102533	0.054	0.067	0.0931656
chr10	81587845	81588129	5	0.81173	0.71047	0.101267	0.054	0.16	0.0931656
chr10	81924074	81924218	5	0.42487	0.31693	0.107933	0.29	0.49	0.298711
chr10	82116345	82116369	5	0.67373	0.7882	-0.114467	0.16	0.48	0.184744
chr10	82168828	82169072	17	0.50367	0.43169	0.103267	0.11	0.35	0.144028
chr10	82269465	82269596	7	0.81338	0.91895	-0.105571	0.00065	0.0026	0.00785269
chr10	82306342	82306443	6	0.68078	0.78367	-0.102889	0.029	0.022	0.0650695
chr10	82309103	82309294	5	0.47767	0.60933	-0.131667	0.085	0.25	0.122672
chr10	82319932	82320022	5	0.59567	0.46947	0.1262	0.12	0.63	0.15276
chr10	82325661	82325720	8	0.58854	0.454	0.134542	0.03	0.11	0.0669836
chr10	82346766	82347099	5	0.55973	0.6626	-0.102867	0.33	0.79	0.335586
chr10	82414839	82414907	5	0.50747	0.34793	0.159533	0.021	0.16	0.0544314
chr10	82488135	82488147	5	0.7198	0.83353	-0.113733	0.071	0.36	0.109797
chr10	82503957	82504003	5	0.2096	0.33613	-0.126533	0.04	0.024	0.0784711
chr10	82872846	82872892	5	0.7616	0.87367	-0.112067	0.019	0.015	0.0517666
chr10	82959327	82959373	5	0.45133	0.27273	0.1786	0.021	0.17	0.0544314
chr10	83478977	83479097	5	0.3316	0.17987	0.151733	0.015	0.0069	0.0452071
chr10	83926016	83926071	5	0.57827	0.4424	0.135867	0.085	0.11	0.122672
chr10	83958379	83958483	7	0.41229	0.52724	-0.114952	0.023	0.15	0.0590008
chr10	84645712	84645752	5	0.61533	0.7422	-0.126867	0.16	0.17	0.184744
chr10	84928845	84928935	5	0.62087	0.7832	-0.162333	0.024	0.066	0.0590008
chr10	85954336	85954371	5	0.50167	0.6068	-0.105133	0.27	0.63	0.280797
chr10	85995818	85995849	5	0.16	0.28493	-0.124933	0.0058	0.039	0.027636
chr10	86300586	86300639	5	0.35327	0.54047	-0.1872	0.044	0.071	0.0829482
chr10	86300930	86300950	5	0.54113	0.70267	-0.161533	0.065	0.36	0.104005
chr10	86354141	86354173	5	0.68753	0.5854	0.102133	0.11	0.49	0.144028
chr10	86360389	86360435	5	0.20353	0.31473	-0.1112	0.003	0.0072	0.0191201
chr10	86522338	86522409	8	0.70504	0.84192	-0.136875	0.0021	0.04	0.0159951
chr10	86522532	86522588	5	0.1738	0.30913	-0.135333	0.11	0.17	0.144028
chr10	86856767	86856798	5	0.67887	0.78687	-0.108	0.11	0.16	0.144028
chr10	87115443	87115518	5	0.5716	0.76753	-0.195933	0.0066	0.065	0.0294304
chr10	87188510	87188601	5	0.0484	0.1484	-0.1	0.026	0.023	0.0614142
chr10	87362306	87362357	5	0.55453	0.67273	-0.1182	0.071	0.069	0.109797
chr10	87967548	87967589	5	0.4902	0.63613	-0.145933	0.054	0.35	0.0931656
chr10	87967675	87967682	5	0.67633	0.53707	0.139267	0.059	0.065	0.0979646
chr10	88089971	88090312	5	0.4792	0.37887	0.100333	0.27	0.63	0.280797
chr10	88096974	88097122	8	0.46454	0.593	-0.128458	0.087	0.29	0.125372
chr10	88122581	88122790	5	0.64453	0.74773	-0.1032	0.12	0.48	0.15276
chr10	88123731	88123822	11	0.37261	0.48645	-0.113848	0.018	0.058	0.0512868
chr10	88125979	88126011	5	0.8044	0.4088	0.3956	0.00072	0.0037	0.00827279
chr10	88160696	88160711	5	0.31347	0.46387	-0.1504	0.093	0.16	0.12948
chr10	88160715	88160721	5	0.22473	0.34107	-0.116333	0.14	0.24	0.169624
chr10	88160721	88160734	5	0.2944	0.45753	-0.163133	0.14	0.35	0.169624
chr10	88160763	88160782	5	0.25453	0.37793	-0.1234	0.085	0.1	0.122672
chr10	88160985	88161135	22	0.23556	0.41188	-0.176318	1.1e-10	2.1e-08	1.02711e-08
chr10	88432251	88432268	5	0.66127	0.7948	-0.133533	0.0066	0.066	0.0294304
chr10	88666349	88666459	10	0.7373	0.61307	0.124233	0.011	0.054	0.0386271
chr10	88702358	88702524	5	0.92387	0.80233	0.121533	0.044	0.16	0.0829482
chr10	88728259	88728295	5	0.75767	0.86233	-0.104667	0.085	0.35	0.122672
chr10	88963543	88963598	7	0.5281	0.82086	-0.292762	3.1e-06	3.2e-05	0.000112793
chr10	89122147	89122229	5	0.65333	0.75407	-0.100733	0.019	0.013	0.0517666
chr10	89123896	89124099	5	0.78613	0.6466	0.139533	0.14	0.35	0.169624
chr10	91174617	91175006	20	0.6155	0.87632	-0.260817	4.6e-14	2.8e-12	1.03333e-11
chr10	91175771	91175836	7	0.81281	0.91505	-0.102238	0.021	0.11	0.0544314
chr10	92617349	92617602	5	0.75227	0.8948	-0.142533	0.21	0.5	0.229403
chr10	92759097	92759640	5	0.653	0.75573	-0.102733	0.42	0.35	0.422042
chr10	93263173	93263339	14	0.55914	0.67638	-0.117238	3.9e-05	1.5e-05	0.000956487
chr10	94351733	94351853	5	0.5036	0.63473	-0.131133	0.19	0.48	0.210824
chr10	94391307	94391407	5	0.68313	0.79033	-0.1072	0.15	0.35	0.177332
chr10	94459343	94459382	5	0.7822	0.88367	-0.101467	0.059	0.17	0.0979646
chr10	94832374	94832427	5	0.7798	0.65173	0.128067	0.059	0.065	0.0979646
chr10	96532693	96532728	5	0.4888	0.642	-0.1532	0.15	0.17	0.177332
chr10	96577544	96577597	5	0.23213	0.10767	0.124467	0.026	0.023	0.0614142
chr10	97321585	97321681	5	0.27547	0.37747	-0.102	0.42	0.79	0.422042
chr10	97803688	97803748	5	0.70453	0.84493	-0.1404	0.04	0.0069	0.0784711
chr10	97890043	97890161	15	0.54904	0.68913	-0.140089	1.3e-05	4.1e-05	0.000385277
chr10	98523264	98523362	5	0.73433	0.8526	-0.118267	0.18	0.35	0.20362
chr10	98803433	98803679	5	0.47373	0.61593	-0.1422	0.13	0.35	0.161045
chr10	98826963	98827139	5	0.7326	0.84607	-0.113467	0.014	0.065	0.044522
chr10	98945176	98945219	5	0.49387	0.3874	0.106467	0.029	0.16	0.0650695
chr10	98955671	98955810	7	0.4459	0.57524	-0.129333	0.09	0.1	0.129167
chr10	99051239	99051303	5	0.3152	0.42293	-0.107733	0.18	0.35	0.20362
chr10	99072617	99072689	5	0.5622	0.69213	-0.129933	0.093	0.48	0.12948
chr10	99186039	99186071	5	0.536	0.38333	0.152667	0.12	0.35	0.15276
chr10	99206506	99206568	5	0.63933	0.75847	-0.119133	0.24	0.64	0.255127
chr10	99209849	99209918	5	0.65787	0.76173	-0.103867	0.059	0.17	0.0979646
chr10	99327288	99327331	5	0.80093	0.92053	-0.1196	0.029	0.16	0.0650695
chr10	99392929	99393007	6	0.65978	0.87167	-0.211889	0.015	0.022	0.0452071
chr10	99393128	99393160	5	0.67887	0.85447	-0.1756	0.0015	0.0018	0.012931
chr10	99492852	99492942	5	0.70227	0.81587	-0.1136	0.14	0.49	0.169624
chr10	99534920	99535091	5	0.34473	0.23073	0.114	0.14	0.36	0.169624
chr10	100027865	100027899	10	0.49047	0.61327	-0.1228	0.0057	0.013	0.027636
chr10	100481570	100482068	5	0.64773	0.7618	-0.114067	0.1	0.49	0.134759
chr10	100992222	100992254	5	0.8342	0.95267	-0.118467	0.0084	0.013	0.0334963
chr10	101031830	101031952	6	0.68767	0.80311	-0.115444	0.11	0.27	0.144028
chr10	101293015	101293270	30	0.57382	0.61926	-0.110778	0.28	0.63	0.291041
chr10	101294611	101294672	5	0.63927	0.80947	-0.1702	0.044	0.014	0.0829482
chr10	101946758	101946817	7	0.30962	0.42452	-0.114905	0.017	0.15	0.0486611
chr10	102241996	102242050	5	0.83153	0.9504	-0.118867	0.033	0.17	0.0706102
chr10	102289162	102289207	6	0.23717	0.55389	-0.316722	2.1e-06	2.1e-07	8.09701e-05
chr10	102289234	102289518	17	0.24818	0.33194	-0.112208	0.05	0.12	0.0899594
chr10	102289519	102289549	5	0.34873	0.48047	-0.131733	2.1e-05	8.4e-05	0.000569056
chr10	102415030	102415080	5	0.37613	0.53773	-0.1616	0.27	0.35	0.280797
chr10	102437679	102437697	5	0.3562	0.22727	0.128933	0.026	0.1	0.0614142
chr10	102475899	102475958	9	0.52393	0.64033	-0.116407	0.14	0.23	0.169624
chr10	102490265	102490576	7	0.72205	0.82671	-0.104667	0.27	0.49	0.280797
chr10	102491310	102491351	5	0.58553	0.71373	-0.1282	0.18	0.64	0.20362
chr10	102495158	102495208	5	0.8336	0.70947	0.124133	0.019	0.066	0.0517666
chr10	102508341	102508357	5	0.77907	0.92587	-0.1468	0.00098	0.0019	0.010093
chr10	102508490	102508524	5	0.73353	0.83573	-0.1022	0.071	0.17	0.109797
chr10	102509166	102509320	5	0.66173	0.49327	0.168467	0.0039	0.039	0.0220782
chr10	102573826	102573834	5	0.2272	0.37453	-0.147333	0.0039	0.04	0.0220782
chr10	102587355	102587435	8	0.54325	0.70267	-0.159417	0.0061	0.027	0.0288087
chr10	102892265	102892337	5	0.6518	0.5464	0.1054	0.071	0.068	0.109797
chr10	102977193	102977246	5	0.83207	0.98353	-0.151467	0.029	0.065	0.0650695
chr10	102987021	102987042	5	0.81893	0.70427	0.114667	0.085	0.16	0.122672
chr10	102989329	102989388	5	0.65527	0.55007	0.1052	0.33	0.64	0.335586
chr10	102996574	102996625	6	0.68878	0.80439	-0.115611	0.05	0.13	0.0899594
chr10	102996644	102996705	5	0.86007	0.75827	0.1018	0.11	0.16	0.144028
chr10	103020914	103020959	5	0.8424	0.7366	0.1058	0.19	0.64	0.210824
chr10	103050928	103051074	5	0.56407	0.44227	0.1218	0.19	0.36	0.210824
chr10	103052243	103052360	7	0.4039	0.53038	-0.126476	0.11	0.28	0.144028
chr10	103489619	103489759	10	0.36687	0.47837	-0.1115	0.024	0.18	0.0590008
chr10	103575201	103575276	6	0.521	0.74028	-0.219278	2.6e-05	0.0013	0.000679595
chr10	103888665	103888709	5	0.6442	0.53007	0.114133	0.29	0.63	0.298711
chr10	104000678	104000749	5	0.52007	0.41773	0.102333	0.21	0.35	0.229403
chr10	104199796	104199866	5	0.20567	0.34393	-0.138267	0.25	0.35	0.262712
chr10	104595953	104596012	5	0.8606	0.96593	-0.105333	0.015	0.065	0.0452071
chr10	104611250	104611314	5	0.70307	0.8276	-0.124533	0.16	0.35	0.184744
chr10	105041614	105041681	5	0.28973	0.17413	0.1156	0.024	0.1	0.0590008
chr10	105110109	105110152	5	0.16633	0.26793	-0.1016	0.0026	0.002	0.0176522
chr10	105155242	105155306	7	0.77976	0.65262	0.127143	0.0012	0.02	0.0114957
chr10	105539406	105539494	5	0.41167	0.61607	-0.2044	0.014	0.023	0.044522
chr10	105578031	105578368	6	0.92467	0.81039	0.114278	0.029	0.057	0.0650695
chr10	105614952	105615010	5	0.67613	0.81493	-0.1388	0.085	0.35	0.122672
chr10	105615046	105615256	5	0.7744	0.66473	0.109667	0.37	0.79	0.373616
chr10	105802350	105802376	5	0.79707	0.90033	-0.103267	0.29	0.36	0.298711
chr10	106198323	106198413	7	0.40576	0.52614	-0.120381	0.058	0.15	0.0979646
chr10	106238732	106238782	8	0.49788	0.614	-0.116125	0.11	0.055	0.144028
chr10	106400315	106400339	5	0.80833	0.91193	-0.1036	0.059	0.16	0.0979646
chr10	106401813	106401898	8	0.55838	0.69821	-0.139833	0.037	0.16	0.0753812
chr10	106402085	106402180	5	0.40213	0.5038	-0.101667	0.19	0.24	0.210824
chr10	106402898	106402918	5	0.6812	0.56533	0.115867	0.31	0.63	0.317078
chr10	107437725	107437900	5	0.4604	0.34833	0.112067	0.11	0.023	0.144028
chr10	108510209	108510263	5	0.16593	0.31633	-0.1504	0.04	0.068	0.0784711
chr10	108510282	108510540	5	0.47007	0.36187	0.1082	0.29	0.5	0.298711
chr10	108524507	108524563	7	0.2721	0.38343	-0.111333	0.03	0.15	0.0669836
chr10	108596211	108596227	5	0.3476	0.4498	-0.1022	0.019	0.023	0.0517666
chr10	108687853	108687919	5	0.22767	0.34507	-0.1174	0.21	0.24	0.229403
chr10	108715638	108715757	5	0.56633	0.46053	0.1058	0.1	0.25	0.134759
chr10	108844064	108844107	7	0.20948	0.31462	-0.105143	0.16	0.49	0.184744
chr10	108924701	108924724	5	0.68793	0.39287	0.295067	0.00084	0.0018	0.00909853
chr10	108924729	108924804	5	0.5534	0.67473	-0.121333	0.16	0.64	0.184744
chr10	109351926	109352024	5	0.8446	0.69507	0.149533	0.04	0.16	0.0784711
chr10	109674407	109674441	5	0.22507	0.36047	-0.1354	0.1	0.17	0.134759
chr10	110168553	110168613	9	0.61533	0.7343	-0.118963	0.046	0.23	0.0862257
chr10	110326736	110326780	7	0.40019	0.61424	-0.214048	0.011	0.0027	0.0386271
chr10	111051867	111051929	8	0.43721	0.53908	-0.101875	0.045	0.22	0.08472
chr10	112457825	112457888	5	0.5978	0.71447	-0.116667	0.065	0.11	0.104005
chr10	114157845	114157909	6	0.53011	0.65711	-0.127	0.00024	0.00067	0.003875
chr10	114606456	114606512	5	0.59213	0.74353	-0.1514	0.033	0.039	0.0706102
chr10	114666262	114666462	7	0.69129	0.8291	-0.13781	0.021	0.07	0.0544314
chr10	114713357	114713499	5	0.14513	0.28527	-0.140133	0.0026	0.013	0.0176522
chr10	114760841	114760864	5	0.802	0.69027	0.111733	0.093	0.24	0.12948
chr10	114890771	114890821	5	0.97	0.82207	0.147933	0.012	0.0069	0.0399656
chr10	115183789	115183996	5	0.5608	0.6702	-0.1094	0.22	0.36	0.237283
chr10	115862625	115862701	5	0.81587	0.7048	0.111067	0.18	0.16	0.20362
chr10	116587330	116587372	5	0.78647	0.91	-0.123533	0.026	0.023	0.0614142
chr10	116853583	116853597	5	0.8416	0.70873	0.132867	0.1	0.35	0.134759
chr10	117676758	117676804	5	0.6974	0.8042	-0.1068	0.015	0.0073	0.0452071
chr10	117792363	117792423	10	0.64357	0.76243	-0.118867	0.03	0.098	0.0669836
chr10	118031778	118031826	5	0.89887	0.75893	0.139933	0.14	0.17	0.169624
chr10	118033527	118034031	47	0.57771	0.59189	0.100633	0.12	0.37	0.15276
chr10	118034060	118034143	10	0.5285	0.7078	-0.1793	0.00031	0.00036	0.00462464
chr10	118055258	118055397	8	0.34746	0.45383	-0.106375	0.045	0.16	0.08472
chr10	118350474	118350584	7	0.33748	0.44819	-0.110714	0.27	0.2	0.280797
chr10	118368633	118369764	70	0.60868	0.59569	-0.1686	0.14	0.35	0.169624
chr10	118429831	118429871	5	0.51953	0.64347	-0.123933	0.44	0.64	0.441538
chr10	118722683	118722740	5	0.628	0.7662	-0.1382	0.0026	0.0019	0.0176522
chr10	118885579	118885637	5	0.41927	0.5518	-0.132533	0.071	0.16	0.109797
chr10	118893992	118894028	7	0.81529	0.69976	0.115524	0.026	0.02	0.0614142
chr10	118897518	118897540	5	0.46667	0.7066	-0.239933	0.024	0.039	0.0590008
chr10	118899916	118899928	5	0.80027	0.9206	-0.120333	0.029	0.11	0.0650695
chr10	118927501	118927507	5	0.1762	0.3552	-0.179	0.003	0.0075	0.0191201
chr10	118927625	118927675	5	0.6744	0.567	0.1074	0.33	0.64	0.335586
chr10	118981984	118982227	5	0.676	0.5484	0.1276	0.15	0.49	0.177332
chr10	119015653	119015834	5	0.1256	0.27387	-0.148267	0.019	0.0072	0.0517666
chr10	119256873	119256919	5	0.5518	0.66607	-0.114267	0.15	0.36	0.177332
chr10	119292254	119292286	5	0.7574	0.53013	0.227267	0.014	0.013	0.044522
chr10	119292324	119292531	7	0.48505	0.35733	0.127714	0.19	0.38	0.210824
chr10	119294320	119294339	5	0.65573	0.75607	-0.100333	0.065	0.16	0.104005
chr10	119294915	119294951	5	0.82393	0.93213	-0.1082	0.019	0.065	0.0517666
chr10	119296326	119296358	5	0.20487	0.3058	-0.100933	0.017	0.065	0.0486611
chr10	119313245	119313296	7	0.51695	0.81129	-0.294333	0.005	0.073	0.0255577
chr10	119511254	119511345	5	0.73607	0.83687	-0.1008	0.093	0.07	0.12948
chr10	120005703	120005739	5	0.74487	0.85287	-0.108	0.15	0.16	0.177332
chr10	120106973	120107163	12	0.37967	0.27197	0.107694	0.063	0.077	0.104005
chr10	120354141	120354202	5	0.6652	0.844	-0.1788	0.13	0.35	0.161045
chr10	120354548	120354634	16	0.76677	0.69471	0.1256	0.021	0.11	0.0544314
chr10	120354647	120354786	22	0.55771	0.60629	-0.169222	0.018	0.19	0.0512868
chr10	120355129	120355151	7	0.32571	0.17381	0.151905	0.0029	0.031	0.0191201
chr10	120654905	120655016	5	0.641	0.80913	-0.168133	0.0075	0.039	0.0313342
chr10	120767314	120767378	5	0.75693	0.6542	0.102733	0.16	0.48	0.184744
chr10	121020898	121021117	14	0.60195	0.71748	-0.115524	0.002	0.027	0.0153923
chr10	121171884	121171985	7	0.48852	0.66276	-0.174238	0.03	0.048	0.0669836
chr10	121173413	121173674	9	0.78393	0.88663	-0.102704	0.0028	0.012	0.018886
chr10	121318688	121318971	7	0.81071	0.91776	-0.107048	0.024	0.048	0.0590008
chr10	121440393	121440512	5	0.5914	0.72067	-0.129267	0.029	0.11	0.0650695
chr10	121770986	121771031	7	0.26552	0.38338	-0.117857	0.016	0.048	0.0479134
chr10	121974881	121974964	10	0.34173	0.45127	-0.109533	0.011	0.0054	0.0386271
chr10	121975237	121975302	5	0.7744	0.8898	-0.1154	0.015	0.065	0.0452071
chr10	122154763	122154820	5	0.92373	0.654	0.269733	0.002	0.007	0.0153923
chr10	122216354	122216391	7	0.30919	0.45905	-0.149857	0.0017	0.02	0.0137097
chr10	122217337	122217349	5	0.89867	0.78287	0.1158	0.065	0.25	0.104005
chr10	122358934	122359088	5	0.61453	0.74747	-0.132933	0.015	0.16	0.0452071
chr10	122362901	122362922	5	0.56127	0.45513	0.106133	0.25	0.36	0.262712
chr10	122409912	122410002	5	0.63373	0.7688	-0.135067	0.0045	0.023	0.0238952
chr10	123052052	123052157	5	0.88067	0.9864	-0.105733	0.00084	0.00091	0.00909853
chr10	123774741	123774818	7	0.557	0.66938	-0.112381	0.16	0.37	0.184744
chr10	124467576	124467609	5	0.91087	0.80533	0.105533	0.044	0.1	0.0829482
chr10	124713971	124713990	7	0.64438	0.75395	-0.109571	0.00065	0.00025	0.00785269
chr10	124894491	124894568	5	0.6144	0.71673	-0.102333	0.11	0.35	0.144028
chr10	124896122	124896236	5	0.76113	0.6202	0.140933	0.21	0.35	0.229403
chr10	124902998	124903065	5	0.81973	0.95327	-0.133533	0.00012	0.00092	0.00229913
chr10	124909432	124909470	7	0.62548	0.7401	-0.114619	0.058	0.38	0.0979646
chr10	125042270	125042316	5	0.77907	0.66527	0.1138	0.12	0.35	0.15276
chr10	125202878	125202940	5	0.568	0.6878	-0.1198	0.33	0.49	0.335586
chr10	125327145	125327222	5	0.82207	0.95647	-0.1344	0.033	0.1	0.0706102
chr10	125853723	125853789	5	0.3024	0.4494	-0.147	0.029	0.068	0.0650695
chr10	125928415	125928510	5	0.7398	0.6262	0.1136	0.24	0.25	0.255127
chr10	126043306	126043550	5	0.50607	0.36127	0.1448	0.19	0.36	0.210824
chr10	126107844	126107862	5	0.32227	0.21587	0.1064	0.15	0.35	0.177332
chr10	126138091	126138166	5	0.82007	0.69167	0.1284	0.059	0.065	0.0979646
chr10	126229178	126229305	5	0.50587	0.68413	-0.178267	0.12	0.35	0.15276
chr10	126262919	126262957	5	0.81247	0.943	-0.130533	0.0026	0.013	0.0176522
chr10	126279670	126279696	5	0.7188	0.8418	-0.123	0.0075	0.0069	0.0313342
chr10	126483743	126483834	5	0.67607	0.78367	-0.1076	0.12	0.17	0.15276
chr10	126490058	126490099	5	0.5164	0.62867	-0.112267	0.21	0.65	0.229403
chr10	126850542	126850576	10	0.3323	0.22757	0.104733	0.015	0.1	0.0452071
chr10	127407515	127407680	29	0.56495	0.70154	-0.136586	3.9e-06	0.00029	0.000138966
chr10	127584730	127584748	5	0.44233	0.5682	-0.125867	0.071	0.35	0.109797
chr10	127585147	127585208	5	0.6318	0.4668	0.165	0.059	0.17	0.0979646
chr10	128259842	128260212	5	0.7662	0.89307	-0.126867	0.085	0.17	0.122672
chr10	128398850	128398912	7	0.29538	0.39629	-0.100905	0.13	0.2	0.161045
chr10	128811922	128812174	6	0.60672	0.71606	-0.109333	0.3	0.27	0.308909
chr10	129534932	129534983	5	0.643	0.488	0.155	0.0095	0.0069	0.035697
chr10	129537072	129537152	8	0.47854	0.35567	0.122875	0.08	0.29	0.119116
chr10	129565529	129565560	5	0.74287	0.87993	-0.137067	0.00033	8.8e-05	0.00476257
chr10	129650170	129650289	10	0.43783	0.54317	-0.105333	0.053	0.13	0.0931656
chr10	129789273	129789430	10	0.3661	0.4811	-0.115	0.053	0.28	0.0931656
chr10	129800184	129800296	7	0.77771	0.87867	-0.100952	0.013	0.072	0.0429546
chr10	129815948	129816015	5	0.44407	0.343	0.101067	0.27	0.49	0.280797
chr10	129816179	129816209	5	0.15247	0.269	-0.116533	0.25	0.25	0.262712
chr10	129816510	129816560	5	0.38613	0.49947	-0.113333	0.093	0.17	0.12948
chr10	129819359	129819394	5	0.21327	0.34713	-0.133867	0.0026	0.067	0.0176522
chr10	130008558	130008907	28	0.61764	0.5017	0.11594	0.0007	0.00094	0.00827279
chr10	130085169	130085212	5	0.8362	0.71653	0.119667	0.14	0.35	0.169624
chr10	130268467	130268482	5	0.60353	0.70753	-0.104	0.026	0.065	0.0614142
chr10	130279905	130279913	5	0.51133	0.66847	-0.157133	0.012	0.023	0.0399656
chr10	130338639	130338720	5	0.3074	0.41347	-0.106067	0.49	0.8	0.49076
chr10	130339676	130339692	5	0.2578	0.37613	-0.118333	0.0058	0.0069	0.027636
chr10	130373103	130373132	5	0.34327	0.44547	-0.1022	0.27	0.16	0.280797
chr10	130492635	130492686	5	0.20607	0.33547	-0.1294	0.0075	0.023	0.0313342
chr10	130493480	130493501	5	0.23773	0.33887	-0.101133	0.0035	0.065	0.0209136
chr10	130576590	130576618	5	0.40653	0.5872	-0.180667	0.011	0.023	0.0386271
chr10	130794621	130794720	6	0.53472	0.68778	-0.153056	0.058	0.19	0.0979646
chr10	131120191	131120224	5	0.7078	0.81147	-0.103667	0.085	0.25	0.122672
chr10	131231389	131231503	5	0.48007	0.5984	-0.118333	0.093	0.36	0.12948
chr10	131265070	131265101	5	0.5856	0.687	-0.1014	0.22	0.5	0.237283
chr10	131329822	131329835	5	0.71513	0.82413	-0.109	0.065	0.16	0.104005
chr10	131757391	131757448	5	0.67793	0.8736	-0.195667	0.017	0.11	0.0486611
chr10	131762285	131762320	5	0.5628	0.74007	-0.177267	0.011	0.066	0.0386271
chr10	131762579	131762703	23	0.1802	0.35416	-0.173957	0.00073	5.2e-11	0.00836908
chr10	131763819	131763868	5	0.502	0.35907	0.142933	0.054	0.24	0.0931656
chr10	131763886	131763929	5	0.57293	0.71173	-0.1388	0.015	0.066	0.0452071
chr10	131765841	131765962	5	0.78233	0.903	-0.120667	0.054	0.065	0.0931656
chr10	131859073	131859124	5	0.39433	0.2812	0.113133	0.21	0.36	0.229403
chr10	131927411	131927475	8	0.13483	0.41858	-0.28375	2.4e-05	0.0003	0.000641379
chr10	131927484	131927519	6	0.0525	0.18639	-0.133889	0.0086	0.036	0.0341182
chr10	131987850	131987862	5	0.86807	0.97093	-0.102867	0.015	0.024	0.0452071
chr10	131988362	131988563	47	0.51708	0.70157	-0.184489	7.9e-14	6e-10	1.45774e-11
chr10	131988594	131988618	5	0.45867	0.663	-0.204333	0.0058	0.023	0.027636
chr10	132062332	132062547	5	0.64373	0.50087	0.142867	0.19	0.48	0.210824
chr10	132222670	132222791	7	0.75081	0.87129	-0.120476	0.024	0.1	0.0590008
chr10	132251691	132251909	5	0.7894	0.92887	-0.139467	0.012	0.023	0.0399656
chr10	132282175	132282267	8	0.48279	0.67058	-0.187792	0.01	0.016	0.0372596
chr10	132560461	132560524	5	0.47447	0.5942	-0.119733	0.026	0.068	0.0614142
chr10	132560542	132560908	5	0.4712	0.3702	0.101	0.37	0.63	0.373616
chr10	132754402	132754729	7	0.82148	0.71638	0.105095	0.2	0.85	0.221571
chr10	132847042	132847165	5	0.78073	0.9108	-0.130067	0.0011	0.013	0.0106429
chr10	132886955	132886981	5	0.59633	0.82493	-0.2286	0.0051	0.065	0.0255577
chr10	132935544	132935635	5	0.6468	0.4902	0.1566	0.33	0.16	0.335586
chr10	133019890	133020074	5	0.47287	0.5902	-0.117333	0.18	0.49	0.20362
chr10	133029469	133029556	7	0.73119	0.86448	-0.133286	0.068	0.15	0.108347
chr10	133029833	133029874	5	0.7446	0.61813	0.126467	0.059	0.25	0.0979646
chr10	133051309	133051757	20	0.57597	0.65453	-0.117933	0.16	0.63	0.184744
chr10	133051838	133051924	5	0.73333	0.87467	-0.141333	0.033	0.1	0.0706102
chr10	133052704	133052945	5	0.558	0.65807	-0.100067	0.33	0.36	0.335586
chr10	133058931	133059088	5	0.38127	0.50813	-0.126867	0.15	0.64	0.177332
chr10	133120945	133121010	6	0.50694	0.33983	0.167111	0.094	0.49	0.130485
chr10	133148907	133148956	5	0.76727	0.6452	0.122067	0.071	0.16	0.109797
chr10	133238990	133239049	5	0.6438	0.49273	0.151067	0.019	0.16	0.0517666
chr10	133251561	133251665	9	0.79763	0.92041	-0.122778	0.0016	0.0026	0.0135742
chr10	133272040	133272227	5	0.8428	0.63687	0.205933	0.0023	0.0018	0.0166979
chr10	133275006	133275046	5	0.3012	0.44053	-0.139333	0.11	0.36	0.144028
chr10	133288630	133288831	5	0.1152	0.27093	-0.155733	0.0066	0.023	0.0294304
chr10	133372832	133372971	5	0.437	0.3362	0.1008	0.33	0.63	0.335586
chr10	133570504	133570757	7	0.4679	0.5711	-0.10319	0.18	0.21	0.20362
chr10	133591222	133591382	5	0.48833	0.38767	0.100667	0.27	0.16	0.280797
chr10	133657081	133657301	9	0.47781	0.37756	0.100259	0.24	0.57	0.255127
chr10	133872208	133872270	5	0.72527	0.61307	0.1122	0.012	0.039	0.0399656
chr10	133961814	133961850	5	0.91707	0.8076	0.109467	0.0095	0.066	0.035697
chr10	134000166	134000226	8	0.87325	0.98525	-0.112	0.0074	0.04	0.0313342
chr10	134016151	134016187	5	0.85107	0.95353	-0.102467	0.0013	0.00095	0.0117219
chr10	134050197	134050364	5	0.9106	0.79907	0.111533	0.1	0.16	0.134759
chr10	134064750	134064858	5	0.77507	0.88467	-0.1096	0.085	0.16	0.122672
chr10	134095595	134095734	10	0.55347	0.6677	-0.114233	0.06	0.16	0.0995611
chr10	134096485	134096566	5	0.73253	0.86347	-0.130933	0.015	0.11	0.0452071
chr10	134109524	134109755	5	0.80167	0.69833	0.103333	0.19	0.35	0.210824
chr10	134121000	134121089	14	0.49062	0.62174	-0.131119	0.0016	0.00062	0.0135742
chr10	134122451	134122534	5	0.28947	0.4474	-0.157933	0.0066	0.013	0.0294304
chr10	134186904	134186967	5	0.91673	0.81147	0.105267	0.012	0.014	0.0399656
chr10	134231200	134231444	5	0.7062	0.85067	-0.144467	0.044	0.065	0.0829482
chr10	134282711	134282794	5	0.8362	0.66247	0.173733	0.019	0.11	0.0517666
chr10	134333165	134333357	5	0.5988	0.72213	-0.123333	0.12	0.49	0.15276
chr10	134359216	134359308	5	0.9342	0.80793	0.126267	0.036	0.11	0.0735275
chr10	134601490	134601500	5	0.49613	0.72007	-0.223933	0.0095	0.039	0.035697
chr10	134611787	134611830	5	0.55007	0.68413	-0.134067	0.019	0.023	0.0517666
chr10	134620170	134620188	5	0.62887	0.7604	-0.131533	0.11	0.067	0.144028
chr10	134620955	134620993	5	0.6878	0.5554	0.1324	0.029	0.07	0.0650695
chr10	134623027	134623043	5	0.93933	0.8248	0.114533	0.0051	0.0039	0.0255577
chr10	134630880	134631110	5	0.34553	0.4716	-0.126067	0.033	0.04	0.0706102
chr10	134631580	134631613	5	0.60127	0.70373	-0.102467	0.29	0.35	0.298711
chr10	134651672	134651705	5	0.133	0.273	-0.14	0.014	0.041	0.044522
chr10	134679699	134680016	5	0.47213	0.31467	0.157467	0.25	0.63	0.262712
chr10	134683103	134683137	7	0.73957	0.84176	-0.10219	0.0063	0.048	0.0294304
chr10	134694011	134694287	5	0.72173	0.5514	0.170333	0.19	0.16	0.210824
chr10	134723843	134724032	5	0.28833	0.16553	0.1228	0.071	0.35	0.109797
chr10	134724111	134724151	5	0.070333	0.18573	-0.1154	0.11	0.16	0.144028
chr10	134730167	134730230	5	0.39447	0.2306	0.163867	0.1	0.35	0.134759
chr10	134733125	134733212	5	0.6102	0.72687	-0.116667	0.31	0.25	0.317078
chr10	134733459	134733521	9	0.43396	0.2367	0.197259	0.0079	0.064	0.0327845
chr10	134733573	134733604	5	0.44707	0.66147	-0.2144	0.044	0.11	0.0829482
chr10	134736547	134736575	5	0.4134	0.54393	-0.130533	0.059	0.24	0.0979646
chr10	134737954	134738009	5	0.5046	0.363	0.1416	0.11	0.36	0.144028
chr10	134738297	134738312	5	0.3546	0.45487	-0.100267	0.24	0.48	0.255127
chr10	134739098	134739158	5	0.888	0.7732	0.1148	0.14	0.35	0.169624
chr10	134770647	134770771	5	0.3134	0.42807	-0.114667	0.29	0.63	0.298711
chr10	134775354	134775382	5	0.52047	0.72587	-0.2054	0.036	0.16	0.0735275
chr10	134789129	134789290	7	0.32481	0.453	-0.12819	0.038	0.28	0.0771649
chr10	134799787	134799851	5	0.28813	0.3988	-0.110667	0.044	0.25	0.0829482
chr10	134803506	134803515	5	0.58933	0.7892	-0.199867	0.00084	0.013	0.00909853
chr10	134803574	134803603	5	0.68447	0.80027	-0.1158	0.21	0.64	0.229403
chr10	134807779	134807836	5	0.55487	0.70907	-0.1542	0.019	0.04	0.0517666
chr10	134811769	134811849	5	0.2816	0.1266	0.155	0.024	0.0038	0.0590008
chr10	134814547	134814818	7	0.51152	0.40429	0.107238	0.08	0.032	0.119116
chr10	134827323	134827380	5	0.5272	0.37847	0.148733	0.18	0.48	0.20362
chr10	134828060	134828123	5	0.70713	0.60027	0.106867	0.14	0.16	0.169624
chr10	134833551	134833566	5	0.67927	0.57127	0.108	0.033	0.066	0.0706102
chr10	134833585	134833637	5	0.3132	0.45107	-0.137867	0.071	0.16	0.109797
chr10	134835650	134835681	5	0.8876	0.76933	0.118267	0.059	0.17	0.0979646
chr10	134843519	134843526	5	0.73813	0.6036	0.134533	0.093	0.068	0.12948
chr10	134845952	134846024	5	0.50107	0.6104	-0.109333	0.27	0.65	0.280797
chr10	134847464	134847560	5	0.50547	0.63133	-0.125867	0.12	0.36	0.15276
chr10	134851814	134851912	5	0.32593	0.59987	-0.273933	0.00053	0.0037	0.00673361
chr10	134853343	134853364	5	0.3946	0.4986	-0.104	0.14	0.068	0.169624
chr10	134857686	134857714	5	0.48713	0.58987	-0.102733	0.19	0.35	0.210824
chr10	134874756	134874915	5	0.4516	0.55893	-0.107333	0.37	0.64	0.373616
chr10	134875710	134875727	5	0.37853	0.60113	-0.2226	0.0011	0.0019	0.0106429
chr10	134875804	134875836	5	0.42513	0.30507	0.120067	0.11	0.36	0.144028
chr10	134896320	134896378	9	0.34556	0.52781	-0.182259	0.0021	0.023	0.0159951
chr10	134913708	134913726	5	0.1482	0.30347	-0.155267	0.0066	0.0073	0.0294304
chr10	134918031	134918069	5	0.59267	0.69453	-0.101867	0.25	0.64	0.262712
chr10	134928341	134928354	5	0.6976	0.58613	0.111467	0.24	0.64	0.255127
chr10	134935843	134935867	5	0.5294	0.6682	-0.1388	0.017	0.065	0.0486611
chr10	134940637	134940686	5	0.74367	0.63847	0.1052	0.33	0.16	0.335586
chr10	134942117	134942154	5	0.82127	0.66787	0.1534	0.033	0.17	0.0706102
chr10	134942525	134942554	5	0.49433	0.30827	0.186067	0.0045	0.0075	0.0238952
chr10	134955364	134955561	5	0.28033	0.4754	-0.195067	0.049	0.16	0.088355
chr10	134974206	134974240	5	0.34373	0.49793	-0.1542	0.12	0.069	0.15276
chr10	134978283	134978342	7	0.57248	0.6771	-0.104619	0.16	0.29	0.184744
chr10	134979524	134979642	5	0.617	0.77547	-0.158467	0.12	0.35	0.15276
chr10	134993420	134993622	9	0.2473	0.38063	-0.133333	0.012	0.046	0.0399656
chr10	134997000	134997301	10	0.28707	0.39227	-0.1052	0.089	0.074	0.128052
chr10	134999694	134999711	5	0.62013	0.80553	-0.1854	0.0084	0.041	0.0334963
chr10	135003139	135003212	5	0.14873	0.28173	-0.133	0.024	0.023	0.0590008
chr10	135010928	135011059	13	0.48885	0.63956	-0.150718	0.002	0.062	0.0153923
chr10	135011940	135012013	7	0.68319	0.82548	-0.142286	0.0099	0.048	0.0369937
chr10	135012674	135012687	5	0.56747	0.68887	-0.1214	0.071	0.25	0.109797
chr10	135013091	135013181	5	0.4884	0.37047	0.117933	0.093	0.17	0.12948
chr10	135013373	135013524	5	0.66833	0.77367	-0.105333	0.13	0.48	0.161045
chr10	135015440	135015633	12	0.33833	0.46994	-0.131611	0.019	0.043	0.0517666
chr10	135016305	135016349	5	0.30493	0.4102	-0.105267	0.13	0.25	0.161045
chr10	135018844	135019058	8	0.7145	0.58358	0.130917	0.16	0.58	0.184744
chr10	135027240	135027384	10	0.52773	0.6498	-0.122067	0.076	0.093	0.116508
chr10	135032619	135032730	10	0.66563	0.8128	-0.147167	0.029	0.13	0.0650695
chr10	135043849	135043872	5	0.49833	0.32633	0.172	0.15	0.35	0.177332
chr10	135049021	135049050	5	0.69067	0.5496	0.141067	0.15	0.35	0.177332
chr10	135055701	135055923	7	0.53881	0.40652	0.132286	0.094	0.11	0.130485
chr10	135056282	135056361	5	0.5396	0.65373	-0.114133	0.42	0.49	0.422042
chr10	135060933	135061038	5	0.85107	0.74833	0.102733	0.085	0.24	0.122672
chr10	135065582	135065607	5	0.4262	0.60653	-0.180333	0.059	0.11	0.0979646
chr10	135071198	135071364	10	0.2769	0.4978	-0.2209	3.8e-08	1.2e-05	2.18148e-06
chr10	135071546	135071802	5	0.5416	0.6508	-0.1092	0.11	0.24	0.144028
chr10	135087399	135087429	5	0.2294	0.3398	-0.1104	0.085	0.35	0.122672
chr10	135090330	135090406	8	0.544	0.65712	-0.113125	0.12	0.16	0.15276
chr10	135092595	135092621	7	0.88333	0.73124	0.152095	0.017	0.02	0.0486611
chr10	135132197	135132261	5	0.20707	0.55633	-0.349267	0.00017	1.7e-05	0.00300114
chr10	135132433	135132454	5	0.21567	0.36793	-0.152267	0.00028	0.00045	0.00425908
chr10	135143700	135143788	5	0.0996	0.20473	-0.105133	0.04	0.023	0.0784711
chr10	135171934	135171993	5	0.39753	0.51847	-0.120933	0.19	0.17	0.210824
chr10	135208637	135208725	5	0.65667	0.8076	-0.150933	0.11	0.16	0.144028
chr10	135239132	135239338	5	0.46147	0.6422	-0.180733	0.00084	0.0018	0.00909853
chr10	135246725	135246806	6	0.81489	0.70189	0.113	0.18	0.37	0.20362
chr10	135246807	135246844	5	0.6452	0.76927	-0.124067	0.18	0.48	0.20362
chr10	135253962	135254179	5	0.65073	0.79873	-0.148	0.078	0.35	0.116508
chr10	135271698	135271892	12	0.69564	0.58164	0.114	0.0056	0.017	0.027636
[truncated: 13,502 more rows]
