# Supplementary material for: Activation of the cGAS-STING pathway by a mitochondrial DNA-targeted emissive rhodium(iii) metallointercalator
Source: Royal Society of Chemistry journal article supplement (doi:10.1039/d3sc01737k), 2023-01-01
Supplement: d3sc01737k5.xlsx [file d3sc01737k5.xlsx]

## Sheet: Sheet1
Supplementary Data S4. Differentially expressed genes (DEGs) identified by RNA-seq in HeLa cells treated with Rh-Mito (1.0 μM) for 6 h
Gene_Symbol	Control-1	Control-2	Rh4-1	Rh4-2	log2FoldChange	pvalue	FDR
C9orf152	2.2771	2.16299	8.33469	5.16969	1.60391	0.384509	0.64748
Human_newGene_1548	105.885	123.29	47.2299	62.8979	-1.05648	0.0279907	0.123172
RPS11	22033.3	22040.8	22632.4	17801	-0.124402	0.486695	0.728437
ELMO2	1765.89	2098.1	2584.68	2369.44	0.358379	0.0535296	0.191319
CREB3L1	3.41566	0	0	0	-3.37534	0.486912	NA
PNMA1	1704.41	1879.63	1649.34	1606.05	-0.138859	0.428051	0.683995
MMP2	0	2.16299	1.85215	0	-0.232391	0.959987	NA
TMEM216	38.7108	36.7708	47.2299	49.9737	0.365181	0.558602	0.781633
Human_newGene_23324	0	4.32597	14.8172	6.03131	2.25858	0.250482	0.508894
C10orf90	2.2771	2.16299	0	4.30808	-0.0380865	0.989554	NA
Human_newGene_9705	48.9578	46.5042	37.0431	46.5272	-0.191129	0.758025	0.898939
ZHX3	2565.16	1755.26	2707.85	1861.95	0.0809532	0.764231	0.90243
ERCC5	2036.87	554.806	2104.05	2485.76	0.824606	0.34071	0.605506
AP002884.3	0	5.40746	2.77823	0	-0.968595	0.787356	NA
Human_newGene_16866	158.259	232.521	140.764	202.48	-0.187006	0.638696	0.833688
RXFP3	0	0	0	3.44646	3.08016	0.524579	NA
APBB2	1916.18	2271.13	2368.9	2689.96	0.27276	0.148882	0.372177
KLHL13	1860.39	1376.74	1265.02	1189.03	-0.399441	0.0716353	0.232496
KRTAP10-8	0	0	0	0	NA	NA	NA
NAPRT	1580.31	2090.53	1673.42	1717.2	-0.114689	0.585096	0.800417
PDCL3	436.066	534.257	369.505	437.701	-0.265494	0.314507	0.580707
AEN	1749.96	1636.3	2481.89	2233.31	0.47761	0.00630796	0.0414604
FRG2	0	0	0	0	NA	NA	NA
DECR1	329.042	475.857	362.096	361.017	-0.155032	0.600132	0.809527
SALL1	300.578	292.003	244.484	169.738	-0.517336	0.117327	0.321117
Human_newGene_4948	4.55421	0	0	0	-3.79091	0.433248	NA
CADM4	653.529	675.933	527.864	504.907	-0.364458	0.0926379	0.276217
RPS18	39629.6	35272.9	32791.4	26312.9	-0.341757	0.0579892	0.202388
SLC10A7	245.927	276.862	272.267	379.972	0.31948	0.310463	0.575992
CFHR5	0	0	0	0	NA	NA	NA
OR2K2	0	0	0	0	NA	NA	NA
Human_newGene_23994	2.2771	3.24448	5.55646	3.44646	0.702608	0.721225	NA
BRIX1	2845.24	3015.2	3671.89	4270.17	0.438537	0.0108576	0.0620587
PXYLP1	2049.39	2281.95	1447.46	1509.55	-0.550701	0.00172521	0.0154979
LMAN1	14936.7	9595	10712.9	8002.69	-0.390408	0.126764	0.335817
CHD8	4337.89	3907.43	5722.23	6372.51	0.552804	0.000826596	0.00873643
SUMO1	1690.75	2018.07	1186.3	1474.22	-0.479162	0.0240922	0.110312
GP1BA	121.825	69.2155	130.577	53.4202	-0.054731	0.92838	0.975503
UQCR11	1999.3	2517.72	2252.22	1944.67	-0.106236	0.602841	0.811439
DDB1	15876	15045.7	14217.1	14273.5	-0.118123	0.410092	0.668503
MYO9B	4188.73	3777.65	5129.54	4975.83	0.343157	0.030652	0.130967
MMP7	0	3.24448	0	0	-3.3058	0.496237	NA
CRNKL1	916.535	881.417	1008.5	1255.37	0.332685	0.119356	0.324715
XAB2	2630.06	2194.35	3534.83	3048.4	0.448473	0.0185532	0.0923859
RTN1	54.6505	80.0305	50.9342	72.3757	-0.127142	0.821673	0.927395
KLHL14	0	0	0	0	NA	NA	NA
TBX10	0	2.16299	4.63038	12.0626	2.93602	0.183339	0.420754
ZBTB12	940.444	1111.77	939.968	1017.57	-0.0682164	0.740743	0.88969
UTY	0	0	0	0	NA	NA	NA
CENPQ	433.789	439.086	457.482	629.841	0.317311	0.239731	0.495077
AC011330.3	0	9.73343	0	0	-4.88962	0.223039	NA
ZAR1L	9.10842	0	2.77823	0	-1.71767	0.591291	NA
DTNBP1	577.246	732.171	713.079	1013.26	0.398851	0.141753	0.361111
KBTBD8	4.55421	4.32597	25.9301	14.6475	2.19127	0.0720046	0.233314
ZEB1	965.493	778.675	1063.14	1215.74	0.386118	0.0790842	0.249298
ZG16	10.247	11.8964	5.55646	8.61616	-0.642405	0.62204	0.822969
FAT4	50.0963	68.134	63.8993	68.0676	0.157999	0.770698	0.905058
MIER1	1862.67	1490.3	2611.54	2739.94	0.674671	0.000485834	0.00570623
CHD9	3839.2	3349.38	4213.65	4620.84	0.297531	0.0813527	0.254182
DUXB	0	0	0	1.72323	2.08249	0.670577	NA
STK16	626.204	591.577	634.362	466.134	-0.146445	0.570191	0.789859
Human_newGene_24312	182.168	235.765	39.8213	56.005	-2.12339	9.27414e-07	3.01203e-05
ARID3C	30.7409	5.40746	18.5215	2.58485	-0.777974	0.584558	0.800034
TOB2	3337.1	3374.26	6912.24	8579.97	1.2069	1.79926e-11	2.1071e-09
INIP	728.674	730.008	1112.22	1338.95	0.748974	0.000327617	0.00415845
BANK1	0	0	0	0	NA	NA	NA
OR2V2	0	0	0	0	NA	NA	NA
SFTA2	0	0	0	0	NA	NA	NA
GRM2	3.41566	5.40746	8.33469	19.8172	1.67342	0.228508	0.481315
SPIN2B	112.717	116.801	157.433	127.519	0.311556	0.427752	0.68396
PIR	3317.74	4083.72	2466.14	2659.81	-0.530018	0.00442958	0.0319695
Human_newGene_20228	25.0482	135.187	108.351	123.211	0.529961	0.469117	0.71538
IPO9	8354.7	8987.2	7745.7	8189.66	-0.122031	0.419251	0.676833
OOSP4B	0	0	0	0	NA	NA	NA
PCARE	0	0	0	0	NA	NA	NA
EVC	1040.64	896.557	780.683	715.141	-0.373008	0.0764423	0.243196
CXCL13	0	0	0	0	NA	NA	NA
SORL1	362.06	483.427	311.162	329.999	-0.39935	0.158147	0.384469
NAT10	2929.5	3064.95	2541.15	2756.31	-0.178293	0.274559	0.535965
CHD1	5039.23	4261.08	5386.99	7347.86	0.453516	0.0334154	0.138711
SYN3	39.8493	21.6299	30.5605	31.0182	0.00373716	0.996148	0.998655
Human_newGene_2843	17.0783	35.6893	34.2648	0	-0.625612	0.693325	0.864437
SLC22A2	2.2771	0	2.77823	0	0.287118	0.946253	NA
SERPINF1	51.2349	54.0746	37.0431	77.5454	0.123195	0.847532	0.940634
WDR34	5363.72	7076.21	4653.54	5033.56	-0.360871	0.0662648	0.221444
OR7A17	0	0	0	0	NA	NA	NA
SUGCT	179.891	168.713	109.277	66.3444	-0.990434	0.0226417	0.10563
POTED	0	0	0	0	NA	NA	NA
MINAR2	0	0	2.77823	0	2.7635	0.569164	NA
LHB	0	0	6.48254	16.3707	5.80783	0.0157247	0.0819743
TAOK3	2766.68	3007.63	2881.95	3650.67	0.178072	0.357453	0.622419
STK25	1654.32	2220.3	1591.93	1488.87	-0.330936	0.124694	0.332989
OR10X1	0	0	0	0	NA	NA	NA
CDC25B	2427.39	2422.54	2104.05	1623.28	-0.379988	0.0588466	0.204668
AC104109.3	26.1867	46.5042	23.1519	57.7282	0.154623	0.845973	0.93982
BMP3	0	0	0	0	NA	NA	NA
MAP1LC3C	0	0	1.85215	0	2.17711	0.65609	NA
AC034102.2	0	0	0	0	NA	NA	NA
CRYGC	0	0	0	0	NA	NA	NA
POU3F1	0	0	2.77823	3.44646	3.93078	0.297291	NA
Human_newGene_9814	18.2168	12.9779	32.4127	17.2323	0.669947	0.478993	0.721863
HIGD1B	0	3.24448	3.70431	12.9242	2.3493	0.278731	0.541102
Human_newGene_3968	1535.91	1920.73	2997.71	2816.62	0.750069	0.0001032	0.00161852
USP6NL	931.336	1006.87	1576.18	1914.51	0.848843	2.59053e-05	0.000515024
ABCD4	633.035	795.979	571.389	603.131	-0.283114	0.228927	0.481931
TEK	0	0	1.85215	0	2.17711	0.65609	NA
SLC25A46	2294.18	2430.11	2122.57	2908.81	0.090964	0.670733	0.85072
LARP7	750.306	1049.05	665.849	1005.51	-0.10637	0.716388	0.877226
CD160	25.0482	19.4669	58.3428	22.402	0.858164	0.308696	0.574038
NUTM2G	43.265	20.5484	62.9732	44.804	0.757318	0.288556	0.552259
PHF20	7121.65	6305.1	6320.47	6485.38	-0.0682676	0.66602	0.848557
CPNE4	0	0	0	0	NA	NA	NA
GTPBP1	3709.4	2933.01	3785.8	3380.98	0.109657	0.572318	0.791593
RAB33B	618.234	546.154	985.346	844.383	0.652071	0.00330429	0.0253413
TMEM266	74.0059	91.9269	92.6077	124.073	0.385083	0.405386	0.664062
ALDOC	1625.85	1128	1064.06	898.665	-0.488543	0.0510357	0.185127
ZNF212	572.692	631.592	1403.01	1352.74	1.19405	1.0028e-09	7.58911e-08
NUDT1	462.252	619.695	621.397	451.487	-0.0127522	0.964871	0.987711
Human_newGene_10822	81.9758	58.4006	58.3428	51.6969	-0.350943	0.521506	0.754543
RFPL2	2.2771	0	0	0	-2.78936	0.568379	NA
Human_newGene_5651	800.402	687.829	608.432	690.154	-0.196299	0.382249	0.645898
ZNF83	1186.37	1129.08	945.524	835.767	-0.378495	0.054257	0.192916
GDPD5	892.625	693.237	844.582	785.793	0.0401101	0.861931	0.947115
PDCD4	4472.23	5105.73	3906.19	4812.98	-0.135495	0.471299	0.717153
MARCOL	1759.06	1507.6	530.642	434.254	-1.75969	9.57102e-16	2.39933e-13
CEP350	3039.94	2761.05	4173.83	4943.09	0.652349	0.00025163	0.0033643
Human_newGene_15295	34.1566	18.3854	33.3388	39.6343	0.47588	0.538363	0.766687
ARL14EPL	6.83131	3.24448	0.926077	14.6475	0.633299	0.730031	0.883438
OR10A2	0	0	4.63038	0	3.50167	0.468149	NA
CST7	0	0	3.70431	0	3.17928	0.511	NA
SELL	3.41566	2.16299	3.70431	7.75454	1.04214	0.578063	NA
CIAO1	2388.68	2134.87	2345.75	2461.64	0.0879036	0.607449	0.813786
RNF223	25.0482	9.73343	29.6345	30.1565	0.78414	0.390793	0.652673
OR8J3	0	0	0	0	NA	NA	NA
CAVIN3	274.391	453.145	301.901	460.103	0.066745	0.85526	0.943727
LTBP4	4414.17	3916.09	4372.01	3201.76	-0.137409	0.51485	0.750044
DCAF4L1	66.036	49.7487	502.86	593.653	3.24525	1.88171e-23	1.58896e-20
OR6C1	0	0	0	0	NA	NA	NA
SIRT6	521.457	549.398	937.19	831.459	0.723649	0.000733675	0.00793983
CCL19	0	2.16299	0	0	-2.72193	0.578153	NA
PPIL1	1691.89	1747.69	1264.09	1349.29	-0.396261	0.0239005	0.109874
GBP7	0	0	0	0	NA	NA	NA
Human_newGene_16364	2.2771	0	0	9.47777	2.06617	0.522654	NA
STK17A	1184.09	1492.46	1706.76	2039.44	0.484994	0.0240917	0.110312
OR9G1	0	0	0	0	NA	NA	NA
ABR	3401.99	3699.79	3388.51	3368.92	-0.0717493	0.651191	0.840998
PCDHA13	0	0	0	0	NA	NA	NA
FOXE1	0	0	0	0	NA	NA	NA
SIAH3	0	0	0	0	NA	NA	NA
RIMBP3B	17.0783	37.8522	19.4476	12.0626	-0.804687	0.396709	0.656978
GML	0	0	0	0	NA	NA	NA
CNGA3	3.41566	0	0	1.72323	-0.978028	0.816958	NA
CD38	0	0	0	5.16969	3.66428	0.447323	NA
ZDHHC6	1082.76	1332.4	1075.17	1314.83	-0.0150921	0.945828	0.981048
NEFH	9.10842	4.32597	2.77823	6.89292	-0.469414	0.776624	0.907546
PGBD5	822.035	778.675	1016.83	1298.45	0.532749	0.0160084	0.0830377
Human_newGene_3999	210.632	157.898	276.897	419.607	0.919311	0.0102294	0.0593778
CTDSP2	3894.99	3838.22	4625.75	5923.61	0.448086	0.01739	0.0883208
ZNF257	0	0	0	0	NA	NA	NA
RMND5B	1435.71	2078.63	1515.06	1365.66	-0.287044	0.227387	0.479773
CCNY	2329.48	2419.3	2347.6	2656.36	0.075574	0.659528	0.84503
EXOSC7	1167.02	1312.93	986.272	927.098	-0.374385	0.0536146	0.191495
CFAP157	92.2228	99.4973	79.6426	58.5899	-0.47296	0.327435	0.592229
C11orf88	0	0	0	0	NA	NA	NA
ROR2	3217.55	3884.72	2998.64	2117.85	-0.473293	0.0393745	0.154796
Human_newGene_2017	18.2168	41.0967	23.1519	26.7101	-0.251582	0.76626	0.903458
MAOA	54.6505	93.0084	73.1601	130.966	0.467123	0.403112	0.661571
TNNT3	0	0	0	0	NA	NA	NA
GYPC	2.2771	0	1.85215	0	-0.299395	0.947976	NA
C7orf33	0	0	0	0	NA	NA	NA
RNF4	1788.67	2393.34	2502.26	3406.83	0.498724	0.0376336	0.150285
EMC1	2832.72	2383.61	2547.64	2634.82	-0.0092906	0.958614	0.985455
F8A1	398.493	595.902	541.755	466.996	0.0201105	0.945066	0.980884
Human_newGene_16570	666.053	402.315	941.82	809.057	0.713013	0.0167873	0.08595
HDAC7	2311.26	1885.04	2743.04	2608.11	0.350821	0.0616446	0.210808
PLEKHG4	2570.85	3057.38	1816.04	2177.3	-0.495041	0.0120446	0.0671762
GRB2	4693.11	5417.2	6164.89	6805.04	0.359327	0.0336636	0.139488
HIST1H2AD	11.3855	14.0594	3.70431	4.30808	-1.66658	0.225059	0.476679
DUS3L	519.18	712.704	499.155	827.151	0.106689	0.740143	0.889169
EIF1	14614.5	16674.5	20523.7	26855.7	0.598614	0.00203248	0.017513
FPGT	513.487	575.354	374.135	267.962	-0.762655	0.00716952	0.0453937
CHST15	1074.79	1085.82	554.72	549.711	-0.968168	9.40146e-07	3.04107e-05
Human_newGene_1092	489.578	456.39	162.989	68.9292	-2.02994	2.02487e-06	5.87469e-05
RASA4B	354.09	272.536	404.695	282.61	0.133202	0.681612	0.858045
GPN2	1361.71	1379.98	2464.29	3018.24	0.999863	1.47927e-07	6.07929e-06
GDF10	1.13855	2.16299	0	0	-3.32931	0.493074	NA
COQ9	3304.08	3600.29	3387.59	3520.56	0.000769637	0.996165	0.998655
TRAPPC9	1055.44	798.142	1026.09	854.723	0.0211022	0.930211	0.976274
GCC2	1236.47	1149.63	1102.03	1284.67	0.000593268	0.9976	0.999275
RARRES3	2.2771	18.3854	16.6694	6.03131	0.130897	0.928983	0.975751
PLXNA1	3014.89	3197.97	3010.68	3070.8	-0.0308566	0.845236	0.93971
KIAA0100	12709.7	10862.5	9603.41	9400.23	-0.310791	0.0550921	0.195121
PMF1	1026.97	1251.29	482.486	469.58	-1.25901	9.81738e-09	5.60534e-07
FNDC1	0	0	0	0	NA	NA	NA
HS2ST1	2701.79	2478.78	2072.56	1911.06	-0.379047	0.0265583	0.118724
CRELD2	955.246	1138.81	764.939	832.321	-0.390748	0.0646036	0.217516
CD82	1202.31	1256.69	1073.32	894.357	-0.321834	0.11299	0.313727
C8G	7.96987	11.8964	20.3737	26.7101	1.24394	0.217983	0.468622
SPINK14	0	0	0	0	NA	NA	NA
PIRT	0	0	0	0	NA	NA	NA
LIM2	0	0	2.77823	0	2.7635	0.569164	NA
Human_newGene_8694	445.174	271.455	350.057	424.776	0.113392	0.734723	0.886038
MMP16	0	0	0	0	NA	NA	NA
CD300H	0	0	0	0	NA	NA	NA
DRD3	0	0	0	0	NA	NA	NA
PTP4A2	5262.39	5084.1	5161.95	5751.28	0.0769878	0.62627	0.824784
OR4M2	0	0	0	0	NA	NA	NA
HPCA	5.69276	3.24448	12.039	13.7858	1.5337	0.264055	0.523731
SEC14L1	9127.78	3826.32	7901.29	5970.13	0.0987183	0.8755	0.953556
METTL25	56.9276	59.4821	105.573	136.135	1.05441	0.0239569	0.109975
NME8	0	0	0	0	NA	NA	NA
EMILIN1	21.6325	46.5042	37.9691	61.1747	0.540315	0.463139	0.710769
CHFR	3.41566	0	0	3.44646	0.0202832	0.995751	NA
NDUFS4	1409.53	1498.95	1278.91	1661.19	0.0157558	0.940758	0.979417
TP53TG3C	0	0	0	0	NA	NA	NA
COL18A1	3183.39	3173.1	2417.06	2824.38	-0.278172	0.10848	0.305449
Human_newGene_22035	3.41566	16.2224	12.039	12.9242	0.343136	0.794755	0.915118
PDZD3	0	0	0	0	NA	NA	NA
PRAMEF7	0	0	0	0	NA	NA	NA
FAXC	195.831	233.602	213.924	246.422	0.100239	0.753704	0.896931
SMIM27	117.271	75.7045	122.242	73.2373	0.0183718	0.971635	0.990488
SF3B6	2379.57	2449.58	2029.96	1976.55	-0.26947	0.0976978	0.285917
C9orf16	704.764	725.682	755.679	619.502	-0.0571546	0.799626	0.917404
FUS	11053.1	15220.9	14620.9	21638.6	0.464724	0.0613187	0.210303
EMX2	0	0	0	0	NA	NA	NA
TF	3.41566	0	1.85215	7.75454	1.50122	0.554589	NA
Human_newGene_4964	0	0	0	0	NA	NA	NA
CXorf56	678.577	646.733	631.584	790.963	0.10249	0.658536	0.844366
CLCN4	1986.77	1865.57	1791.03	1778.37	-0.110012	0.514446	0.74973
NPR1	9.10842	4.32597	3.70431	16.3707	0.584204	0.697389	0.866886
ELAC2	3974.69	3794.96	3762.65	4675.99	0.119251	0.515547	0.750431
CELA1	0	0	0	0	NA	NA	NA
Human_newGene_16412	799.264	566.702	840.878	776.316	0.243825	0.336938	0.60193
ASS1	124389	120745	105624	87593.6	-0.343353	0.0372946	0.149486
USP42	1208	1134.49	2539.3	2969.99	1.23397	2.18672e-11	2.47069e-09
EMC8	1622.44	1493.54	1796.59	2245.37	0.375559	0.0607421	0.208817
SEC23IP	1514.27	1415.67	1917.9	2125.61	0.464873	0.00907042	0.0542804
POLR2J	1605.36	2133.79	1854.93	2018.77	0.050907	0.810517	0.921986
UQCRC1	12846.3	13447.3	11526.9	11932.5	-0.164545	0.254793	0.514136
ERVV-2	36.4337	16.2224	17.5955	21.5404	-0.425985	0.639264	0.833986
POLG	3778.86	3099.56	4033.99	4155.57	0.251798	0.159509	0.386201
ADAM23	0	4.32597	0	3.44646	-0.326662	0.92858	NA
TFR2	218.602	207.647	155.581	173.185	-0.374247	0.253564	0.512429
RICTOR	4423.28	3406.7	4581.3	5105.07	0.307049	0.119131	0.324521
GRXCR2	0	0	2.77823	0	2.7635	0.569164	NA
BORCS8-MEF2B	63.7589	7.57045	164.842	255.038	2.56058	0.000988952	0.0100046
Human_newGene_24028	13.6626	21.6299	1.85215	0	-4.27921	0.0147154	0.0779244
IDO2	0	0	0	2.58485	2.66592	0.583255	NA
SNAPC1	646.698	626.184	720.488	945.192	0.38833	0.102824	0.295064
Human_newGene_532	0	0	1.85215	7.75454	4.55796	0.163584	NA
GNA11	2936.33	3358.03	4133.08	5279.12	0.58049	0.00330355	0.0253413
FSIP1	25.0482	48.6672	20.3737	43.0808	-0.215705	0.790004	0.914109
CELA3A	0	0	0	0	NA	NA	NA
UPF3A	2377.3	2315.48	2180.91	2367.72	-0.0449277	0.786876	0.912837
IGSF11	0	0	1.85215	0	2.17711	0.65609	NA
LAGE3	1047.47	1439.47	1190.01	1369.11	0.0411766	0.860565	0.946067
CHST6	9.10842	4.32597	7.40861	12.0626	0.5389	0.700651	0.86852
Human_newGene_4003	37.5722	5.40746	0.926077	0	-5.57643	0.00701033	0.0447389
UNC13B	5558.41	4757.49	4589.64	4712.18	-0.14923	0.371896	0.63672
TTLL4	828.866	753.8	684.371	661.721	-0.233518	0.26143	0.520523
ZNF687	1851.29	1987.78	2701.37	2957.06	0.559645	0.00098698	0.00999691
SDC2	2939.74	2728.61	2385.57	2536.6	-0.203548	0.216788	0.46699
METTL21A	421.264	454.227	451.925	438.562	0.0243171	0.918846	0.971656
COX7A2	2236.12	2329.54	1370.59	1381.17	-0.730482	1.32122e-05	0.000300949
Human_newGene_1765	38.7108	52.9931	41.6734	34.4646	-0.26962	0.678579	0.855703
ITPRID1	0	0	0	0	NA	NA	NA
LAMB4	0	0	0.926077	0	1.16711	0.815114	NA
AC022414.1	1649.76	1012.28	964.046	1062.37	-0.393334	0.151864	0.376006
FAM24A	0	0	0	2.58485	2.66592	0.583255	NA
PDP1	483.885	387.174	1123.33	1484.56	1.58255	2.88572e-10	2.5865e-08
LRRTM3	0	0	0	0	NA	NA	NA
GPHB5	0	0	0	0	NA	NA	NA
AHCYL2	2289.63	1822.32	1716.02	1421.67	-0.390143	0.0673725	0.223748
OR4C13	0	0	0	0	NA	NA	NA
IZUMO2	0	0	0	0	NA	NA	NA
TRIM64C	0	0	0	0	NA	NA	NA
HABP4	737.782	608.88	792.722	671.199	0.120467	0.608602	0.81438
TMEM125	0	0	0	0	NA	NA	NA
CNTN2	0	0	0	0	NA	NA	NA
ASNSD1	461.114	516.954	653.81	1494.04	1.13507	0.00242682	0.0199877
FUT4	234.542	182.772	168.546	82.7151	-0.732942	0.110206	0.308739
HGH1	651.252	833.831	786.239	865.062	0.152904	0.510152	0.74699
RP9	432.65	520.198	527.864	794.41	0.472862	0.104381	0.298252
ARAP1	2405.76	2377.12	2167.02	1921.4	-0.226425	0.187974	0.428133
CDH8	0	0	0	1.72323	2.08249	0.670577	NA
AGPS	3544.31	3253.13	2553.19	2779.57	-0.350014	0.0352376	0.143819
AC093899.2	0	0	0	0	NA	NA	NA
UNG	4444.91	4350.85	4386.83	5481.6	0.166084	0.36246	0.627325
Human_newGene_11561	13.6626	8.65194	7.40861	9.47777	-0.400155	0.751072	0.895726
GSTP1	11013.2	13114.2	9973.85	10164.5	-0.260748	0.115283	0.3175
DCUN1D5	1070.24	1168.01	1141.85	1167.49	0.0450413	0.809594	0.921737
MYORG	767.384	526.687	652.884	473.889	-0.199751	0.503263	0.741679
SLC9A3R1	872.131	1182.07	1221.5	1470.78	0.390145	0.101675	0.292709
FAM218A	0	0	0	0	NA	NA	NA
Human_newGene_18424	9.10842	23.7928	16.6694	18.0939	0.0775402	0.940775	0.979417
LILRA6	0	4.32597	9.26077	7.75454	1.96692	0.335708	0.600518
CHMP7	1551.85	1573.57	2021.63	1699.11	0.251397	0.180567	0.41667
WASHC3	377.999	514.791	325.053	436.839	-0.228648	0.451819	0.701932
REM2	28.4638	12.9779	105.573	82.7151	2.18675	0.000797094	0.00849175
DNHD1	802.68	329.855	911.259	575.559	0.392863	0.350411	0.615342
FKBP4	10200.3	9095.35	9560.82	9926.67	0.0143019	0.926474	0.974456
ZNF350	154.843	129.779	272.267	285.195	0.970392	0.00261511	0.0211369
Human_newGene_9475	37.5722	19.4669	32.4127	33.603	0.212483	0.785499	0.912165
C19orf67	4.55421	0	4.63038	4.30808	0.978758	0.687802	NA
BST1	6.83131	8.65194	13.8911	8.61616	0.53766	0.675941	0.854257
KISS1R	0	0	0	0	NA	NA	NA
Human_newGene_21656	140.042	205.484	105.573	113.733	-0.656228	0.104845	0.298994
Human_newGene_15024	851.637	459.634	595.467	324.829	-0.51094	0.196682	0.439862
NCR2	0	0	0	0	NA	NA	NA
DEFB125	0	0	0	0	NA	NA	NA
C2orf92	17.0783	30.2818	14.8172	19.8172	-0.451712	0.625291	0.824578
UBE2W	1119.2	734.334	986.272	1554.35	0.455291	0.139226	0.357169
OR2T29	0	0	0	0	NA	NA	NA
KRT15	0	0	0	0	NA	NA	NA
C10orf99	0	0	0	0	NA	NA	NA
SCN11A	0	0	0	2.58485	2.66592	0.583255	NA
GFI1	89.9456	140.594	139.838	190.417	0.518206	0.232672	0.4867
FHL1	4473.37	4209.17	3947.86	3317.22	-0.257194	0.141524	0.360876
SMC6	1925.29	1974.81	1962.36	2210.91	0.0977384	0.574959	0.79326
OSGEP	539.674	691.074	414.882	479.92	-0.459917	0.0737758	0.237064
GATA1	4.55421	0	0	0	-3.79091	0.433248	NA
Human_newGene_18343	546.505	641.325	316.718	336.892	-0.861871	0.000473684	0.0055963
AC012184.2	0	0	0	0	NA	NA	NA
LPIN3	629.62	615.369	430.626	345.508	-0.682173	0.00582574	0.0391286
RPL4	63092.9	51302.8	51194.4	46012.9	-0.234894	0.18137	0.417728
Human_newGene_19948	72.8674	90.8454	64.8254	80.9919	-0.166868	0.736276	0.886712
RBPMS	411.017	374.196	425.069	370.495	0.0187903	0.941603	0.979516
PRPF3	1640.65	1723.9	2324.45	3112.16	0.692381	0.000988988	0.0100046
SPATA19	0	0	0	0	NA	NA	NA
XCR1	0	5.40746	0	4.30808	-0.326753	0.923201	NA
IRX3	1174.99	1713.08	1106.66	1644.82	-0.0698604	0.804649	0.919571
ELFN1	55.7891	70.297	71.3079	24.1252	-0.404134	0.570079	0.789801
RBM6	2819.06	2192.19	3208.86	3437.85	0.407607	0.0378531	0.150811
CYSTM1	1731.74	1477.32	1948.47	1737.88	0.200074	0.296329	0.560613
WAPL	3326.85	3395.89	4860.98	6149.35	0.711789	0.000129625	0.00196199
Human_newGene_12389	0	0	0	9.47777	4.53842	0.264577	NA
AC116366.3	44.4035	48.6672	50.9342	60.3131	0.257572	0.658416	0.844287
Human_newGene_3023	67.1746	87.6009	55.5646	68.9292	-0.314025	0.546586	0.772228
AC018523.2	55.7891	98.4158	69.4557	75.8222	-0.0868693	0.872634	0.952742
KLF4	2266.86	1853.68	1720.65	1996.36	-0.148489	0.459513	0.708167
IFITM10	2.2771	2.16299	142.616	129.242	5.93675	2.40021e-11	2.67423e-09
UNC5CL	42.1264	18.3854	65.7514	31.8798	0.690714	0.383975	0.647246
C16orf71	11.3855	19.4669	7.40861	46.5272	0.806837	0.480141	0.722373
ARMH1	5.69276	4.32597	0	0	-4.92982	0.117838	NA
SEBOX	0	0	0	4.30808	3.40159	0.481232	NA
BTK	0	2.16299	0	3.44646	0.670967	0.869798	NA
KRCC1	250.482	368.789	457.482	626.395	0.807328	0.0113513	0.0642447
SYTL5	0	0	5.55646	0	3.76501	0.434696	NA
PRND	0	0	0	0	NA	NA	NA
PIGL	264.144	224.95	338.018	279.163	0.335549	0.264583	0.524201
MOB1B	2396.65	1984.54	1806.78	1791.3	-0.284	0.128522	0.338755
HUS1	990.541	1087.98	837.173	1134.75	-0.0757564	0.746805	0.893093
DNAJC30	184.446	248.743	125.02	128.381	-0.773948	0.0331936	0.138141
HID1	0	0	0	0	NA	NA	NA
UIMC1	1518.83	1443.79	2188.32	2628.79	0.701439	0.000195435	0.00275418
FXYD2	2.2771	2.16299	1.85215	4.30808	0.475134	0.833607	NA
ZNF667	0	0	0	0	NA	NA	NA
PTGES3L-AARSD1	21.6325	74.623	289.862	126.657	2.11087	0.00142353	0.0132401
ZCCHC12	0	0	0	0	NA	NA	NA
TFEC	0	3.24448	0	0	-3.3058	0.496237	NA
ATP7B	870.993	843.564	770.496	972.764	0.0242462	0.913143	0.969233
C2orf78	2.2771	0	0	0	-2.78936	0.568379	NA
POLD2	5765.63	7010.24	5545.35	5185.2	-0.251758	0.153298	0.377732
ACOT2	597.74	1306.44	487.116	810.78	-0.552973	0.16381	0.392089
HIST1H4I	487.3	227.113	181.511	99.9474	-1.34431	0.004691	0.0334202
PPARGC1A	2438.78	2566.38	2145.72	2509.89	-0.104372	0.55819	0.781193
Human_newGene_15989	0	3.24448	4.63038	10.3394	2.19745	0.316241	0.582522
ETFA	8959.27	8191.23	7078.93	7024.75	-0.282161	0.0620489	0.211586
ZNF146	3776.58	4165.91	5038.78	5715.1	0.437197	0.00930113	0.0553309
POLRMT	4093.1	3937.71	4560	4016.85	0.0948649	0.563172	0.784965
MIA2	1923.02	2097.01	1790.11	2107.51	-0.0445494	0.81096	0.922093
Human_newGene_2243	0	0	7.40861	2.58485	4.61237	0.147855	NA
KLHL6	0	0	0	0	NA	NA	NA
ZNF487	27.3253	34.6078	11.1129	14.6475	-1.26472	0.150201	0.373965
NENF	543.09	666.2	602.876	555.742	-0.0621296	0.793586	0.914891
HOXB5	285.777	258.477	426.921	451.487	0.690932	0.00795324	0.0490022
ARGFX	0	0	0	0	NA	NA	NA
PRSS22	4.55421	0	0	0	-3.79091	0.433248	NA
CASC4	4714.75	4093.45	2079.97	2213.49	-1.03661	1.50637e-09	1.10864e-07
GTSF1	0	0	0	0	NA	NA	NA
CUL4B	3145.82	2916.79	2724.52	2861.43	-0.118064	0.466783	0.713992
CENPJ	1757.93	1133.4	1383.56	1129.58	-0.202173	0.448963	0.699269
PITX1	2459.27	3362.36	2978.26	3001.87	0.0386517	0.853243	0.943133
AKIRIN1	1858.12	1942.36	2543.01	3457.66	0.659031	0.00186002	0.0164148
Human_newGene_15474	186.723	198.995	190.772	160.26	-0.136487	0.685657	0.860088
CELSR3	1707.83	1827.72	2005.88	2050.65	0.198271	0.240699	0.496245
LCN15	17.0783	16.2224	7.40861	16.3707	-0.483207	0.659625	0.845087
PMIS2	0	0	0	0	NA	NA	NA
DNAJC9	1787.53	1707.68	2232.77	2769.23	0.517272	0.0072917	0.0460716
ZNF568	0	0	0	0	NA	NA	NA
ITSN1	3142.4	3033.59	2646.73	2291.9	-0.32264	0.0614897	0.210529
EHBP1L1	3504.46	2862.71	2624.5	1513.86	-0.621719	0.0267651	0.119316
DCTN1	8413.9	9929.18	7767.93	8619.6	-0.162643	0.342236	0.607057
LIN28B	3.41566	0	4.63038	0	0.439462	0.903433	NA
TNKS2	3164.04	2979.51	3420.93	4385.62	0.345718	0.0734846	0.236507
TMEM241	511.21	366.626	384.322	288.641	-0.383513	0.217428	0.467993
C1QBP	5320.46	6309.43	5096.2	5217.94	-0.173249	0.305612	0.570809
CADPS2	0	0	0	0	NA	NA	NA
SRMS	23.9096	0	17.5955	8.61616	0.134123	0.938707	0.979133
GJA9	3.41566	6.48896	11.1129	15.5091	1.42447	0.291525	0.555409
NDUFAF8	307.409	479.101	438.034	431.669	0.144539	0.637292	0.832699
TRIM45	740.059	821.934	416.734	528.17	-0.724837	0.00274752	0.0219419
Human_newGene_20089	337.012	328.774	185.215	75.8222	-1.35225	0.00303878	0.0237478
OSER1	3082.06	2925.44	4833.19	6008.91	0.851888	3.53032e-06	9.48751e-05
TCP1	9564.98	9527.95	8205.04	9991.29	-0.0693544	0.685464	0.860088
TMED7	5036.96	4122.65	3670.97	3248.29	-0.404663	0.0298923	0.128543
CMA1	0	0	0	0	NA	NA	NA
CENPL	530.565	569.947	1384.48	1869.71	1.56419	1.83416e-11	2.13241e-09
PTCRA	0	0	0	0	NA	NA	NA
FST	519.18	687.829	200.033	274.855	-1.34531	8.92569e-06	0.000213101
VWCE	13.6626	10.8149	34.2648	20.6788	1.1663	0.216566	0.466666
PAWR	3909.79	3736.56	3087.54	3191.42	-0.284202	0.0676745	0.224379
TBC1D3B	0	0	0	0	NA	NA	NA
ABCC12	0	0	0	0	NA	NA	NA
SYCE3	0	3.24448	2.77823	6.03131	1.43492	0.572828	NA
LDLR	2827.03	1866.66	1869.75	1104.59	-0.658248	0.0323772	0.136091
ASTN2	255.036	180.609	167.62	194.725	-0.264948	0.457977	0.706993
TAB2	4071.46	4065.33	5261.04	6262.22	0.502068	0.00328467	0.0252314
GPATCH8	3515.85	3563.52	6551.07	7325.46	0.970978	8.81557e-10	6.8327e-08
TANC2	2531	3992.87	5490.71	3094.92	0.396073	0.207565	0.455173
KIF4A	3649.06	3960.43	3766.35	4881.05	0.18452	0.344875	0.609299
FAM161A	581.8	469.368	515.825	496.291	-0.0543933	0.824545	0.929068
PGM1	4436.94	3938.8	3531.13	2797.67	-0.404347	0.0369055	0.148362
CPD	5293.13	3822	4583.15	4528.65	-0.000458074	0.998239	0.999422
SNCAIP	4.55421	0	4.63038	0	0.023529	0.994585	NA
DCT	0	6.48896	9.26077	3.44646	0.962882	0.661585	0.846584
ANXA8	256.174	385.011	179.659	268.824	-0.515458	0.163157	0.390888
AL603832.3	0	0	0	0	NA	NA	NA
HLA-DOA	0	0	0	0	NA	NA	NA
OR11L1	0	0	0	0	NA	NA	NA
TEX53	0	0	0	1.72323	2.08249	0.670577	NA
UPK1B	0	0	0	0	NA	NA	NA
PROSER3	283.5	275.781	260.228	284.333	-0.0382253	0.892054	0.960787
DNAJB4	1648.62	1171.26	1545.62	1761.14	0.230043	0.32542	0.590682
UGT1A8	0	0	0	0	NA	NA	NA
HIST1H4L	0	0	0	0	NA	NA	NA
PECR	343.843	323.366	225.037	209.373	-0.619184	0.0283362	0.124147
WFIKKN1	14.8012	11.8964	46.3038	55.1434	1.92736	0.011063	0.0629415
Human_newGene_11603	89.9456	125.453	65.7514	84.4383	-0.520104	0.27695	0.538919
HSPA2	108.162	100.579	61.1211	37.0495	-1.08994	0.0383578	0.152141
SERP1	5134.87	4895.92	4941.54	5208.47	0.0170854	0.910758	0.968391
SYDE2	428.096	334.181	620.471	622.086	0.705354	0.00520133	0.03611
CNTNAP3B	29.6024	17.3039	45.3778	31.0182	0.704407	0.369417	0.634168
TACR2	0	5.40746	49.0821	23.2636	3.72689	0.00528951	0.0365167
SVOPL	430.373	524.524	395.435	441.147	-0.190913	0.456341	0.705691
AC003002.1	0	0	0	0	NA	NA	NA
NUP85	2961.38	3038.99	2474.48	2620.17	-0.23604	0.139992	0.358505
CD177	0	0	0	2.58485	2.66592	0.583255	NA
EDDM3B	0	0	0	0	NA	NA	NA
PIGG	1408.39	1511.93	1407.64	1542.29	0.0145839	0.936004	0.978106
LGR5	0	0	9.26077	10.3394	5.58546	0.0241702	0.110547
RAB5A	1786.39	2801.07	2679.14	4413.19	0.62855	0.0372655	0.149441
DCAF11	1367.4	1448.12	1440.05	1560.39	0.0917972	0.609279	0.815013
USP9Y	0	0	0	0	NA	NA	NA
Human_newGene_16499	0	7.57045	0	0	-4.5271	0.302126	NA
SUSD6	743.475	602.391	1232.61	1186.44	0.846159	7.71536e-05	0.00127745
PLEKHM3	753.722	562.376	1019.61	1214.88	0.764118	0.00177465	0.0158305
Human_newGene_16274	0	4.32597	0	24.9869	2.5256	0.316541	0.582773
LRP1B	0	0	0	0	NA	NA	NA
Human_newGene_18550	283.5	244.417	268.562	274.855	0.0420835	0.88451	0.957369
XAF1	2.2771	0	0	0	-2.78936	0.568379	NA
TMEM244	0	0	0	0	NA	NA	NA
ENKUR	11.3855	5.40746	4.63038	9.47777	-0.247363	0.864634	0.948331
ANKDD1A	107.024	84.3564	65.7514	58.5899	-0.622057	0.20142	0.446351
ABCG8	0	0	0	8.61616	4.40095	0.295242	NA
DAND5	27.3253	17.3039	21.2998	6.89292	-0.664986	0.529642	0.760205
CASC10	584.077	794.897	481.56	473.889	-0.52966	0.0390543	0.153764
Human_newGene_13615	2469.52	2696.16	2343.9	2335.84	-0.142586	0.387601	0.649673
SPAG6	3.41566	9.73343	6.48254	0	-1.02754	0.644387	0.83659
ZBED6CL	260.729	407.723	261.154	223.158	-0.465636	0.173104	0.405917
ZDHHC22	0	0	0	0	NA	NA	NA
CCDC60	0	0	0	0	NA	NA	NA
THOC7	872.131	1026.34	667.701	673.783	-0.501154	0.0178986	0.09019
Human_newGene_4185	9.10842	5.40746	0	0	-5.46452	0.0480678	NA
TCTA	592.047	839.238	524.159	710.833	-0.212772	0.457199	0.706541
OR8K3	0	0	0	0	NA	NA	NA
GGTLC2	0	0	0	0	NA	NA	NA
B2M	30640.7	26585.3	22177.7	1717.2	-1.25995	0.38508	0.647884
C6orf141	0	0	2.77823	0	2.7635	0.569164	NA
SQLE	1498.34	1302.12	1666.01	1727.54	0.277291	0.13308	0.346445
SEPHS1	4097.65	4464.4	4433.13	5180.03	0.167079	0.331832	0.596384
GLIPR2	190.138	189.261	236.15	201.618	0.206115	0.52179	0.754678
PLRG1	3014.89	3836.05	3652.45	4827.63	0.307779	0.162487	0.390057
HSFX4	0	0	3.70431	1.72323	3.73189	0.351203	NA
SPG7	3195.92	3547.3	2903.25	3019.96	-0.187081	0.254065	0.512991
ZNF614	584.077	502.894	1037.21	1180.41	1.02906	2.25384e-06	6.44574e-05
PARD6G	389.385	359.056	1050.17	1147.67	1.55441	3.16165e-13	5.22944e-11
Human_newGene_3344	0	0	3.70431	2.58485	3.94493	0.293968	NA
INPP5B	1267.21	1567.08	985.346	911.589	-0.579556	0.0055025	0.0375669
GRPEL2	3158.34	3472.67	9039.43	11469	1.62891	4.15711e-18	1.71017e-15
PPID	1704.41	1856.92	1807.7	2041.17	0.112047	0.535426	0.764676
TRIM56	5558.41	4652.58	850.138	3138	-1.35629	0.104954	0.299145
UBE2J1	2041.42	2193.27	2028.11	2504.72	0.098236	0.60984	0.81521
IL20RA	0	0	0	0	NA	NA	NA
ERMARD	376.861	452.064	320.423	329.999	-0.350072	0.18535	0.423613
UTS2R	1.13855	0	6.48254	3.44646	3.14596	0.252237	NA
SPATA48	0	0	0	0	NA	NA	NA
SAFB2	3121.91	3200.14	4129.38	6103.68	0.694839	0.00208297	0.0178712
DNAJC25	647.836	455.308	793.648	621.225	0.359178	0.200103	0.444653
KLRG1	19.3554	23.7928	25.9301	16.3707	-0.0304364	0.972785	0.990737
NEURL3	4.55421	15.1409	4.63038	7.75454	-0.669647	0.648344	0.83955
E2F4	2451.3	2665.88	2728.22	3112.16	0.190738	0.274052	0.535407
CLEC4M	0	0	0	0	NA	NA	NA
TAC1	2.2771	0	0	0	-2.78936	0.568379	NA
NPIPB7	0	0	6.48254	6.89292	5.03412	0.0745935	NA
GYPA	0	0	0	0	NA	NA	NA
TRAIP	333.596	414.212	454.704	499.737	0.351776	0.178714	0.414168
KIAA0232	3943.95	3794.96	4639.64	5155.05	0.339928	0.0335634	0.139289
ERCC8	445.174	466.123	397.287	442.009	-0.118606	0.62476	0.824245
Human_newGene_9784	109.301	81.112	37.0431	28.4333	-1.54082	0.00560336	0.038003
GPX4	6111.75	6676.05	6807.59	5400.61	-0.0669885	0.718311	0.878495
MSS51	53.512	19.4669	64.8254	46.5272	0.610996	0.409712	0.668181
GPR157	581.8	519.117	665.849	661.721	0.270253	0.219393	0.470077
OR52A1	0	0	0	0	NA	NA	NA
FAM199X	4020.23	3436.98	3804.32	3885.02	0.044296	0.7944	0.914891
CTAGE4	0	0	0	0	NA	NA	NA
Human_newGene_2788	158.259	125.453	100.016	57.7282	-0.847939	0.0768522	0.244017
ALG9	2022.07	2241.93	1315.95	1298.45	-0.705807	5.89497e-05	0.00103027
BTBD10	793.571	892.231	1142.78	1135.61	0.434418	0.0265264	0.118615
SDK2	2.2771	2.16299	0	0	-3.75599	0.386316	NA
BAIAP3	185.584	162.224	226.889	216.266	0.349724	0.28056	0.54311
RABGGTB	2441.06	1974.81	2590.24	2927.77	0.321616	0.0992108	0.288356
ANKRD40	2011.82	2086.2	2625.43	2993.25	0.455354	0.0084822	0.0513993
KRT74	0	0	0	0	NA	NA	NA
CALCOCO2	2731.39	3659.77	3708.94	3726.49	0.218244	0.279587	0.54205
SNCA	0	0	0	0	NA	NA	NA
SPATS2L	1204.59	1350.78	1240.94	1305.35	-0.00519045	0.977905	0.991875
ESRRB	10.247	0	9.26077	13.7858	1.17467	0.521296	0.754504
SLC48A1	2606.15	2600.99	1917.9	1690.49	-0.529245	0.0022146	0.0186901
ARHGAP26	306.271	335.263	388.026	543.679	0.538627	0.064535	0.217429
TDRD9	2532.14	2302.5	1884.57	2064.43	-0.291792	0.0934905	0.27808
PRCD	2.2771	0	0	0	-2.78936	0.568379	NA
CDK16	7667.01	6348.36	6683.5	7754.54	0.0429284	0.814519	0.923534
KLRC4	0	0	0	0	NA	NA	NA
HRAS	498.686	680.259	604.728	678.091	0.121619	0.637497	0.832831
JAGN1	1563.23	1702.27	1557.66	1611.22	-0.0433693	0.804993	0.919571
BSDC1	2137.06	2125.13	2546.71	2575.37	0.265145	0.0982573	0.286626
Human_newGene_16484	840.252	516.954	425.069	234.359	-1.04173	0.00564529	0.0382003
RNF43	46.6807	83.2749	52.7864	22.402	-0.79218	0.268099	0.52888
NDUFAF1	545.367	545.072	538.977	487.674	-0.0871456	0.701463	0.868797
PHF12	2401.21	2458.23	3386.66	4815.57	0.755305	0.000544421	0.00623906
KRTAP4-8	3.41566	0	0	0	-3.37534	0.486912	NA
Human_newGene_12887	160.536	133.024	106.499	58.5899	-0.831631	0.0826741	0.257009
OR1L3	0	0	0	0	NA	NA	NA
FOLR2	0	0	4.63038	2.58485	4.14286	0.245953	NA
PLAC8L1	2.2771	3.24448	9.26077	15.5091	2.16438	0.152925	0.37734
LYZL6	0	0	0	0	NA	NA	NA
WSB1	3577.33	2230.04	3972.87	4338.23	0.517281	0.0382559	0.151888
PROS1	1159.05	843.564	696.41	505.768	-0.736387	0.00752707	0.0470449
OSTN	0	0	0	0	NA	NA	NA
Human_newGene_10222	0	0	0	1.72323	2.08249	0.670577	NA
SOCS4	3546.59	2496.09	2467.99	2222.11	-0.365513	0.102774	0.295027
PSMB8	1287.7	1721.74	1290.02	1329.47	-0.200353	0.358484	0.623416
SDR39U1	485.023	607.799	550.09	500.599	-0.057151	0.817661	0.925561
DDIT4L	0	0	0	0	NA	NA	NA
MAS1	0	0	0	0	NA	NA	NA
TBCCD1	347.259	375.278	397.287	422.192	0.181608	0.469483	0.715629
CSHL1	0	0	0	0	NA	NA	NA
Human_newGene_4655	99.0541	88.6824	36.117	30.1565	-1.50288	0.00517997	0.0359773
Human_newGene_2917	55.7891	36.7708	51.8603	23.2636	-0.302223	0.681479	0.858013
ZBTB7C	132.072	95.1714	193.55	126.657	0.494719	0.258177	0.517487
AP2S1	999.649	1275.08	1111.29	930.545	-0.156163	0.493972	0.734232
VAT1	10161.6	8791.45	10438.7	9306.31	0.0590651	0.725552	0.88122
SHANK3	562.445	539.665	578.798	496.291	-0.0360102	0.87706	0.954197
PCNX2	1303.64	1236.15	1327.99	1312.24	0.0559996	0.754268	0.897203
TUFM	11599.6	11628.2	10879.5	10595.3	-0.113211	0.427309	0.683653
THEG	19.3554	8.65194	16.6694	9.47777	-0.0989469	0.931264	0.976306
KRT34	0	0	0	0	NA	NA	NA
SGSM3	1473.29	2049.43	1816.04	1516.44	-0.0803318	0.731571	0.884045
TOMM22	1653.18	1770.4	1305.77	1561.25	-0.255841	0.185038	0.4232
SOCS3	1678.23	1905.59	1114.07	1373.42	-0.526689	0.0103462	0.0598827
CPO	3.41566	0	0.926077	4.30808	0.624141	0.833231	NA
POP4	740.059	746.23	702.892	788.378	0.00498819	0.980945	0.992388
Human_newGene_11635	3.41566	0	123.168	56.005	5.73852	4.51457e-07	1.6096e-05
MALL	2.2771	0	0	0	-2.78936	0.568379	NA
OR1B1	0	0	0	0	NA	NA	NA
TMEM132A	2996.67	3041.16	3137.55	3209.52	0.072066	0.64291	0.835888
LCE1E	0	0	0	0	NA	NA	NA
RUVBL2	5085.91	5877.91	4577.6	4800.92	-0.225342	0.173832	0.40697
CGRRF1	265.283	249.825	537.124	615.194	1.16193	4.43963e-06	0.000116394
Human_newGene_11702	3.41566	0	3.70431	14.6475	2.43722	0.251363	0.510052
PIANP	3.41566	17.3039	7.40861	6.03131	-0.627699	0.670744	0.85072
WNT10B	233.403	277.944	200.033	202.48	-0.345543	0.264929	0.524821
Human_newGene_18749	23.9096	5.40746	11.1129	1.72323	-1.19457	0.429061	0.684517
BAIAP2L2	4.55421	16.2224	21.2998	24.9869	1.15232	0.294498	0.558897
PEAK3	3.41566	0	1.85215	4.30808	0.858691	0.758208	NA
ISCA1	1362.85	1682.8	1701.2	2177.3	0.348757	0.11516	0.3175
AC008687.1	0	0	0	0	NA	NA	NA
RPAP1	2001.58	1963.99	2381.87	2169.55	0.198734	0.240104	0.495663
NXPE2	3.41566	2.16299	5.55646	0	-0.00967853	0.997133	NA
RPL27	11577.9	12227.4	11529.7	9102.11	-0.206455	0.25495	0.514143
NLRP9	0	2.16299	4.63038	6.89292	2.40255	0.321543	NA
EPN1	4818.35	4886.18	4790.59	4434.74	-0.0730983	0.635089	0.830835
VPS50	1021.28	985.24	931.633	1120.1	0.0323871	0.875348	0.953556
MFSD14B	3011.47	2837.84	2985.67	3307.74	0.105666	0.524116	0.755789
SLC35A1	769.661	783.001	712.153	770.284	-0.0666718	0.743943	0.891485
GAL	526.011	588.332	523.233	554.88	-0.0477465	0.83399	0.933873
SLC14A2	0	0	0	1.72323	2.08249	0.670577	NA
RDH11	2398.93	2757.81	2385.57	2674.45	-0.0273164	0.879595	0.955309
TRMT9B	726.396	679.177	620.471	492.844	-0.336576	0.157265	0.383178
LSMEM2	17.0783	5.40746	12.039	24.9869	0.723707	0.53584	0.765122
AUH	655.806	763.534	721.414	718.587	0.0206487	0.923763	0.973226
MBD2	2153	2371.71	1499.32	1710.31	-0.495359	0.0066382	0.043049
ABHD14B	1724.91	1624.4	993.68	782.347	-0.915466	1.34435e-05	0.000303445
KRTAP4-16	0	0	0	0	NA	NA	NA
SPHAR	2.2771	1.08149	1.85215	2.58485	0.405507	0.874672	NA
PIGT	5945.52	6161.26	4833.19	4607.92	-0.358819	0.0171204	0.0872317
ALAS1	2538.97	2910.3	3342.21	4108.18	0.451269	0.0188253	0.0932489
FOXO1	692.24	641.325	1008.5	989.996	0.583723	0.00345707	0.0261943
AC036214.3	0	0	156.507	72.3757	9.13038	1.16066e-08	6.44346e-07
PPP1R17	0	0	0	0	NA	NA	NA
CRLF3	933.613	925.758	1168.71	1120.96	0.300286	0.108045	0.304702
OR5W2	0	0	0	0	NA	NA	NA
Human_newGene_21797	26.1867	33.5263	17.5955	14.6475	-0.8903	0.295165	0.559304
FARS2	794.71	786.245	919.594	1027.91	0.300982	0.133252	0.34678
Human_newGene_6503	157.12	142.757	49.0821	22.402	-2.07179	0.000144536	0.00215315
CCDC28A	655.806	621.858	917.742	951.224	0.548864	0.00641867	0.0419134
Human_newGene_19524	350.674	264.966	320.423	362.74	0.150785	0.609911	0.81521
OR13F1	0	0	0	0	NA	NA	NA
NPHP3	498.686	133.024	310.236	255.9	-0.157692	0.771417	0.905444
PYURF	1397	1531.39	1364.11	1491.46	-0.0363232	0.843435	0.938228
TSEN54	834.559	1082.57	1420.6	1124.41	0.408364	0.0873921	0.266353
Human_newGene_10618	10.247	17.3039	19.4476	20.6788	0.541058	0.585985	0.800609
CFAP20	1231.91	1414.59	1955.87	2550.38	0.767868	0.000354243	0.00442173
OR8B4	0	0	0	0	NA	NA	NA
DEFB106B	0	0	0	0	NA	NA	NA
STH	4.55421	0	0	1.72323	-1.39259	0.723582	NA
Human_newGene_13273	3.41566	0	0	6.89292	1.0199	0.760263	NA
ZC3H14	1492.64	2461.48	2498.55	2834.72	0.431545	0.102182	0.29396
HMGXB4	1630.41	1746.61	1475.24	1795.61	-0.0459785	0.813798	0.923218
CBX2	3273.34	3632.73	5183.25	5854.68	0.676525	6.07288e-05	0.00105168
RBMXL1	845.945	632.673	666.775	575.559	-0.251113	0.319625	0.585535
FAM240A	0	0	0	0	NA	NA	NA
CRTAP	14563.2	10242.8	9802.52	8588.58	-0.431672	0.0451477	0.170351
DDX50	1971.97	1740.12	1688.24	1911.06	-0.0443374	0.811824	0.922574
TBPL2	0	0	0	0	NA	NA	NA
STYXL1	519.18	527.768	389.878	399.79	-0.40684	0.080915	0.25311
DMAC2	700.21	665.118	915.89	610.885	0.160934	0.550599	0.775236
BLVRB	2007.27	2321.96	2084.6	1780.96	-0.16362	0.393619	0.65478
Human_newGene_24165	125.241	84.3564	51.8603	53.4202	-0.992641	0.0502909	0.183295
Human_newGene_22867	11.3855	0	2.77823	0	-2.04045	0.501907	NA
CCZ1B	2082.41	2638.84	2039.22	2377.2	-0.0963149	0.639224	0.833986
MMP24	276.668	452.064	261.154	359.294	-0.232136	0.513849	0.749496
GRID1	0	0	0	0	NA	NA	NA
BANF1	2384.13	2873.53	2727.3	2623.62	0.0252535	0.889518	0.959488
Human_newGene_11467	0	2.16299	0	0	-2.72193	0.578153	NA
HMBS	1356.02	1391.88	1117.77	1085.64	-0.318655	0.0759612	0.242098
FAM13A	937.029	801.386	674.184	507.492	-0.557186	0.0250714	0.113372
SLC25A24	2765.54	2524.2	2300.37	2652.05	-0.0949288	0.593868	0.805071
SLC25A15	883.517	838.157	518.603	454.933	-0.82272	0.000158459	0.00231838
MRO	59.2047	49.7487	36.117	32.7414	-0.661998	0.286785	0.550051
ACER3	374.584	1006.87	851.064	1298.45	0.63762	0.134733	0.349265
FAM84B	276.668	272.536	415.808	576.421	0.853745	0.00317755	0.0246402
TDP1	779.908	645.651	491.747	451.487	-0.595793	0.0114572	0.0646028
C16orf78	0	0	0	0	NA	NA	NA
URAD	0	0	0	0	NA	NA	NA
RFK	3051.32	3095.23	2820.83	3218.13	-0.0254088	0.879961	0.955309
ARHGAP8	0	0	0	0	NA	NA	NA
ZFYVE9	1230.78	1348.62	1448.38	1531.95	0.208406	0.252522	0.51129
GBA2	2405.76	2437.68	2954.18	2967.4	0.289944	0.0657884	0.220243
NDUFB3	826.589	977.669	618.619	609.162	-0.55555	0.0100465	0.0586928
HSD17B13	38.7108	17.3039	12.9651	15.5091	-0.974138	0.30237	0.567261
KRTAP5-11	0	0	0	0	NA	NA	NA
Human_newGene_15103	1.13855	0	0.926077	4.30808	2.22091	0.510355	NA
GRIN3A	2.2771	0	22.2258	15.5091	4.0699	0.0169883	0.0867475
FMNL1	2705.2	3294.23	2813.42	2882.97	-0.0748496	0.68085	0.857827
CHTOP	2306.71	3230.42	2981.97	3409.41	0.206927	0.349915	0.614833
2022-09-07	4797.86	4582.28	4284.96	6224.31	0.164059	0.455681	0.705077
GNLY	3.41566	0	0	1.72323	-0.978028	0.816958	NA
GRAMD1C	242.512	161.142	200.959	196.448	-0.0218974	0.951814	0.983138
ZNF165	101.331	77.8675	94.4598	154.229	0.474153	0.321992	0.588099
ADGRF5	0	0	0	0	NA	NA	NA
USP38	1456.21	1384.31	2905.1	3516.25	1.17685	2.96753e-10	2.64506e-08
FAM83A	74.0059	201.158	229.667	123.211	0.35748	0.52902	0.759585
ARMCX3	1652.04	1343.21	992.754	1385.48	-0.332464	0.173186	0.405974
ARHGDIB	0	0	0	0	NA	NA	NA
ACSM6	0	0	0	0	NA	NA	NA
AK1	1017.87	1554.11	1378	967.594	-0.133263	0.642429	0.8356
ACSS3	0	0	0	0	NA	NA	NA
DIPK2A	720.704	647.814	923.298	1079.6	0.549787	0.0104699	0.0604239
C4B	126.379	42.1782	127.799	48.2505	0.0627473	0.930355	0.976288
Human_newGene_11012	85.3914	83.2749	141.69	141.305	0.746672	0.0651795	0.218911
DNAJB13	17.0783	9.73343	30.5605	42.2192	1.44344	0.0962959	0.28318
Human_newGene_10909	43.265	35.6893	30.5605	15.5091	-0.77905	0.320723	0.586894
MUC22	0	0	0	1.72323	2.08249	0.670577	NA
NEU2	0	0	0	0	NA	NA	NA
TRIM77	0	0	0	0	NA	NA	NA
HIST1H4B	3.41566	6.48896	6.48254	6.89292	0.431579	0.78731	0.912837
FAM20B	5320.46	3987.46	4372.01	3573.98	-0.228228	0.288065	0.551715
HES2	516.903	681.34	581.576	286.918	-0.46502	0.211258	0.459833
NEDD8-MDP1	0	0	0	0	NA	NA	NA
INTS7	2056.23	2588.01	2455.03	3019.96	0.237403	0.259503	0.518569
AMPH	0	0	0	0	NA	NA	NA
ZNF775	120.687	112.475	272.267	200.756	1.02028	0.00522962	0.0362425
USP17L7	0	0	0	0	NA	NA	NA
Human_newGene_12675	0	0	0	4.30808	3.40159	0.481232	NA
UCKL1	3432.74	3701.95	3483.9	3449.91	-0.0412435	0.793434	0.914891
HNRNPH1	7167.19	9235.95	10459.1	9376.1	0.274041	0.150283	0.374111
ALDH1L1	0	0	0	1.72323	2.08249	0.670577	NA
COX16	671.746	790.571	534.346	622.086	-0.338516	0.145688	0.367172
CFAP47	0	0	0	0	NA	NA	NA
SLC23A1	68.3131	59.4821	29.6345	39.6343	-0.882219	0.144454	0.365497
THAP4	1641.79	1558.43	2017.92	1807.67	0.257465	0.147328	0.369853
RBM4B	365.475	480.183	392.656	740.989	0.423023	0.238321	0.493351
AC026398.1	0	0	0	0	NA	NA	NA
OGFRL1	2082.41	1762.83	1669.72	1506.97	-0.275539	0.149426	0.373082
KRTAP10-5	0	0	0	0	NA	NA	NA
PPP1R15A	1819.41	2715.63	6329.73	10846	1.92114	8.33153e-11	8.46077e-09
CCDC197	0	0	0	0	NA	NA	NA
BMF	1037.22	1023.09	446.369	422.192	-1.24629	1.32702e-09	9.8568e-08
MAN1A1	1953.76	1603.85	1398.38	1433.73	-0.328885	0.0902808	0.272052
RBMY1A1	0	0	0	0	NA	NA	NA
PRKN	0	0	0	0	NA	NA	NA
PYCR3	268.698	279.025	175.028	217.127	-0.481542	0.123171	0.331069
AP000646.1	0	0	0	2.58485	2.66592	0.583255	NA
Human_newGene_2827	3704.85	3036.83	2178.13	1642.24	-0.81949	0.000181048	0.00258659
TGIF2LY	0	0	0	0	NA	NA	NA
NKAIN1	113.855	121.127	88.9034	69.7909	-0.567166	0.199112	0.443256
NLGN4X	0	0	0	0	NA	NA	NA
IFNE	39.8493	24.8743	29.6345	18.0939	-0.439987	0.58961	0.8031
ALOX12	61.4818	56.2376	52.7864	51.6969	-0.171933	0.756584	0.898333
Human_newGene_14689	1154.49	1173.42	884.403	1130.44	-0.208129	0.334617	0.599328
RB1CC1	4441.49	4223.23	4311.81	5501.42	0.179656	0.340429	0.605324
Human_newGene_11296	75.1445	62.7266	16.6694	5.16969	-2.66472	0.000908854	0.00937124
NEIL2	440.62	440.168	321.349	201.618	-0.752877	0.0198946	0.0970771
Human_newGene_3533	25.0482	16.2224	143.542	103.394	2.58285	6.89317e-06	0.000169883
Human_newGene_10235	327.903	457.471	263.932	298.119	-0.482846	0.110909	0.310004
TMEM255B	39.8493	27.0373	24.078	18.0939	-0.665658	0.405953	0.664535
EIF4E	1537.05	1281.57	1336.33	1507.83	0.0132513	0.947538	0.981773
AL160272.2	2.2771	0	0	0	-2.78936	0.568379	NA
SIGLEC15	2.2771	0	0	4.30808	0.927767	0.81095	NA
ABHD5	839.113	1012.28	744.566	1008.95	-0.078226	0.752447	0.896368
EXOC4	3875.63	3453.21	3399.63	3133.7	-0.165763	0.323507	0.58913
Human_newGene_22943	2.2771	0	3.70431	1.72323	1.2593	0.676235	NA
AL645941.2	0	0	0	0	NA	NA	NA
PRAMEF14	0	0	0	0	NA	NA	NA
HEATR5A	7479.15	7075.13	6331.59	5568.62	-0.290484	0.0712633	0.231919
Human_newGene_18622	0	2.16299	4.63038	0	1.09001	0.776611	NA
SLC29A4	1564.37	1077.17	1448.38	771.146	-0.251255	0.451185	0.701704
BATF2	2.2771	0	1.85215	3.44646	1.22741	0.685178	NA
HTR4	0	0	1.85215	1.72323	3.13049	0.507096	NA
URGCP	1920.74	2035.37	3808.03	4048.73	0.989835	9.39238e-10	7.21011e-08
EMB	609.126	627.266	339.87	396.343	-0.747627	0.00175874	0.0157199
TRAF6	683.131	551.561	1419.68	1681.01	1.32884	2.27087e-09	1.57042e-07
LPAR3	67.1746	28.1188	49.0821	62.0363	0.223651	0.743238	0.891017
LMNB1	4567.87	3958.26	3119.95	3060.46	-0.464149	0.00567061	0.0383206
Human_newGene_19324	613.68	467.205	337.092	240.391	-0.904724	0.00306137	0.0238894
CKMT1B	89.9456	55.1561	42.5995	32.7414	-0.945662	0.120634	0.326714
FAM19A5	0	0	0	0	NA	NA	NA
SHE	0	0	1.85215	0	2.17711	0.65609	NA
IFIT1B	0	0	0	0	NA	NA	NA
PIK3C2B	5190.66	5731.91	4560	3525.73	-0.433963	0.0257825	0.116097
Human_newGene_3508	103.608	97.3343	65.7514	32.7414	-1.03062	0.0683823	0.225934
NUPR2	0	0	0	0	NA	NA	NA
AKR1E2	0	0	0	0	NA	NA	NA
USP15	1498.34	1382.15	2154.05	2130.78	0.572999	0.000848264	0.00889513
TCEAL2	0	0	0	0	NA	NA	NA
PTGER2	0	0	0	0	NA	NA	NA
AC011479.1	4.55421	0	0	0	-3.79091	0.433248	NA
FAM184B	4.55421	9.73343	18.5215	14.6475	1.21177	0.313637	0.579765
SLC31A1	5188.38	5167.37	5773.16	6544.83	0.250375	0.116848	0.320189
AL160269.1	0	0	0	0	NA	NA	NA
IFT172	1065.69	1279.41	1057.58	1278.64	-0.00544311	0.979998	0.992189
ST7L	385.969	391.5	466.743	546.264	0.382012	0.121293	0.327752
GFOD1	2611.84	2051.59	3172.74	2424.59	0.263341	0.238655	0.493807
ADAM29	0	0	0	0	NA	NA	NA
PKN3	2746.19	2802.15	2846.76	2536.6	-0.0436345	0.794356	0.914891
CNTD1	10.247	11.8964	16.6694	4.30808	-0.0815643	0.950414	0.982693
COMMD1	377.999	412.049	377.839	358.432	-0.101959	0.685701	0.860088
OCM2	0	0	0	0	NA	NA	NA
NTRK2	0	2.16299	0	1.72323	-0.326407	0.944424	NA
FOXN3	2329.48	2445.26	2746.74	3116.46	0.296312	0.083277	0.258645
MFGE8	614.818	643.488	723.266	576.421	0.0463205	0.844292	0.938922
PFKFB2	2782.62	2750.24	1861.41	2026.52	-0.508938	0.00213052	0.0181547
TAS2R4	29.6024	10.8149	18.5215	12.9242	-0.361286	0.727958	0.88238
ENTHD1	0	0	0	0	NA	NA	NA
PRMT5	2181.47	3095.23	3084.76	3339.62	0.283832	0.198168	0.442014
OR5K4	0	0	0	0	NA	NA	NA
HIST2H3A	56.9276	42.1782	117.612	117.18	1.24536	0.0101132	0.0589596
DCAF4	352.951	397.989	513.046	460.964	0.374849	0.1327	0.345848
LCLAT1	883.517	1043.64	902.925	1095.97	0.052774	0.811604	0.92239
Human_newGene_7109	260.729	386.093	158.359	70.6525	-1.49966	0.00126062	0.012056
TSKU	822.035	2364.14	674.184	1253.65	-0.724836	0.377237	0.641106
PDLIM1	2025.48	2243.02	1922.54	1867.98	-0.171429	0.318312	0.584593
KRTCAP3	5.69276	3.24448	32.4127	11.201	2.28821	0.0709402	0.231607
KCNS2	9.10842	5.40746	4.63038	1.72323	-1.19539	0.490347	0.731821
RNF126	1488.09	1421.08	1789.18	2011.87	0.385927	0.0317125	0.134014
CEP63	818.619	801.386	737.157	917.621	0.0309232	0.888996	0.959324
CLIC4	13687.7	15850.4	14607	18008.6	0.142996	0.435782	0.688971
ACR	6.83131	0	0	0	-4.37627	0.337309	NA
Human_newGene_9447	584.077	333.1	488.042	359.294	-0.114134	0.745208	0.892267
KLK7	0	0	1.85215	2.58485	3.4425	0.425853	NA
ALOX5AP	0	0	0	0	NA	NA	NA
RIPK3	0	0	0	0	NA	NA	NA
NBDY	1555.26	803.549	1002.01	939.161	-0.280933	0.378074	0.642021
TAS2R9	3.41566	0	0	8.61616	1.34191	0.674115	NA
C19orf18	0	0	0	0	NA	NA	NA
BIRC6	6170.95	5130.6	4816.52	4706.14	-0.247044	0.152385	0.376852
ZNF16	167.367	156.816	325.979	253.315	0.837231	0.0102359	0.0593943
RFT1	1115.78	1132.32	922.372	834.905	-0.355528	0.0657828	0.220243
ELP6	794.71	957.121	950.155	1022.74	0.17133	0.418544	0.676726
SLC8A2	0	8.65194	0	16.3707	0.918969	0.726184	0.881508
TACC1	3118.5	3939.88	4356.26	4573.46	0.339214	0.0699769	0.229546
ITGAD	7.96987	9.73343	0	0.861616	-4.31853	0.0657451	0.220233
SH3PXD2B	4561.04	4197.27	6301.03	6252.74	0.519427	0.000713568	0.00779171
SAMHD1	4128.39	2862.71	2373.53	4097.84	-0.111305	0.707171	0.872139
EPC2	628.481	887.906	1157.6	1825.76	0.976249	0.000945475	0.00964962
C20orf85	0	0	0	0	NA	NA	NA
ATP13A2	1615.61	1881.8	1671.57	2156.62	0.130439	0.541183	0.768718
ASIC5	0	2.16299	0	0	-2.72193	0.578153	NA
KRT4	0	0	0	2.58485	2.66592	0.583255	NA
DEFB130B	0	0	0	0	NA	NA	NA
TUT4	2975.04	3176.34	3202.37	3788.52	0.184613	0.295874	0.560118
Human_newGene_18499	11.3855	5.40746	11.1129	3.44646	-0.207452	0.889252	0.959413
SNX18	735.505	757.045	1064.06	1158.87	0.574743	0.00334641	0.0255788
MDM2	3654.75	4592.02	3566.32	4596.72	-0.0147085	0.944857	0.980866
CAPNS1	4614.55	5362.04	3424.63	4751.81	-0.28702	0.185002	0.423179
PCDH20	0	0	0	0	NA	NA	NA
KCNK9	2.2771	8.65194	8.33469	0	-0.397081	0.863011	0.947651
OR2C1	0	0	0	0	NA	NA	NA
KLHDC3	3983.8	4121.57	3586.69	3374.95	-0.219499	0.158889	0.385464
IPPK	982.571	967.936	983.493	1288.12	0.220111	0.322418	0.588361
Human_newGene_8553	578.385	635.918	328.757	319.659	-0.905329	0.000134576	0.00202356
EFHD2	3471.45	3188.24	3024.57	2275.53	-0.329533	0.107908	0.304498
NBEA	956.384	828.423	889.96	976.21	0.0645833	0.755526	0.897967
GALR3	0	2.16299	5.55646	0	1.3529	0.713456	NA
ABCA6	0	5.40746	0	5.16969	-0.0643014	0.984464	NA
Human_newGene_2969	51.2349	47.5857	12.9651	17.2323	-1.70872	0.0211101	0.10081
CLDN3	63.7589	83.2749	79.6426	43.9424	-0.252465	0.662202	0.84695
AKT2	3705.99	3573.25	3138.47	2583.99	-0.34724	0.0542455	0.192916
EGFR	11319.5	11686.6	11128.7	12087.6	0.01313	0.929695	0.976071
ZDHHC3	2223.59	2081.87	2526.34	2514.19	0.227452	0.164585	0.393106
Human_newGene_8978	13.6626	20.5484	18.5215	3.44646	-0.643563	0.605991	0.813139
SLC25A4	1057.72	1226.41	952.933	998.612	-0.227107	0.253359	0.512144
CYB5B	6126.55	7071.88	1215.94	7080.76	-0.669737	0.544426	0.771093
TESPA1	0	0	0	0	NA	NA	NA
NDRG1	6952	2763.21	4778.56	2680.49	-0.381252	0.607595	0.813914
CPXM1	0	0	0	0	NA	NA	NA
AC010255.3	0	0	0	0	NA	NA	NA
CDHR4	1.13855	0	0	0	-1.78223	0.721131	NA
OR5L2	0	0	0	0	NA	NA	NA
ZNF285	0	0	0	0	NA	NA	NA
MRPL46	651.252	816.527	828.839	974.487	0.296947	0.20334	0.449322
FARP2	1370.82	1276.16	1260.39	1462.16	0.0408182	0.832088	0.933111
MAPKAPK3	1839.9	2133.79	1782.7	1762	-0.164921	0.360406	0.625389
LDHAL6B	0	10.8149	0	1.72323	-2.64125	0.402163	NA
NCAM2	0	0	0	0	NA	NA	NA
Human_newGene_14480	5.69276	0	4.63038	6.03131	0.911255	0.69022	NA
PRKD2	557.891	485.59	935.337	794.41	0.729192	0.00144252	0.0133548
ZFP36L1	2479.77	2365.22	2480.03	3186.25	0.226042	0.250903	0.509621
CYSLTR1	0	0	0	0	NA	NA	NA
DRICH1	3.41566	1.08149	0	0	-3.77333	0.387262	NA
AL096711.2	0	9.73343	0	12.0626	0.309369	0.909184	0.96827
ERFE	398.493	386.093	192.624	309.32	-0.643567	0.0525668	0.189354
OR4C3	0	0	0	0	NA	NA	NA
CFAP54	2.2771	3.24448	1.85215	4.30808	0.159503	0.941361	NA
HIST1H2AJ	2.2771	2.16299	4.63038	1.72323	0.514302	0.819712	NA
CCNB2	4096.51	3831.73	3512.61	3797.14	-0.11711	0.464302	0.711894
ZNF10	88.8071	88.6824	258.375	292.949	1.63538	1.85262e-06	5.44384e-05
TMEM175	606.848	532.094	524.159	453.21	-0.220799	0.35791	0.622811
TIGD4	25.0482	54.0746	25.0041	18.9555	-0.850043	0.295015	0.559151
PCNP	3462.34	3256.37	3124.58	2816.62	-0.177463	0.283701	0.546422
TBC1D3G	55.7891	30.2818	82.4208	33.603	0.430567	0.556567	0.779738
CREB1	1397	667.281	938.116	2849.36	0.875669	0.324092	0.58955
Human_newGene_20268	63.7589	34.6078	25.0041	9.47777	-1.51495	0.0748583	0.239678
NAA38	1034.94	1535.72	1227.98	1282.95	-0.0341082	0.889893	0.959771
LNPK	1677.09	1405.94	1219.64	1528.51	-0.165614	0.443491	0.69459
C9orf57	0	0	2.77823	2.58485	3.71547	0.35293	NA
TMPRSS3	683.131	833.831	622.324	554.88	-0.366202	0.115379	0.317576
LAT	17.0783	31.3633	52.7864	47.3889	1.0461	0.147183	0.369853
NECTIN4	44.4035	46.5042	11.1129	6.89292	-2.33928	0.00498664	0.034876
KCNA3	0	0	0	0	NA	NA	NA
Human_newGene_3039	544.228	307.144	302.827	411.852	-0.251746	0.485715	0.72762
ZSWIM9	995.095	948.469	1806.78	1761.14	0.876421	7.92219e-07	2.62611e-05
ROPN1B	3.41566	6.48896	15.7433	10.3394	1.39336	0.306516	0.571766
ZHX2	319.933	410.967	412.104	449.763	0.237536	0.381748	0.645596
CDT1	2743.91	2325.21	4525.74	4976.69	0.90668	3.23538e-07	1.20717e-05
Human_newGene_22145	12.5241	0	0	1.72323	-2.84892	0.349631	NA
CFAP53	34.1566	21.6299	86.1251	171.461	2.20954	0.000269269	0.00353242
Human_newGene_6476	471.361	4.32597	31.4866	131.827	-1.54212	0.488566	0.730302
CD28	0	0	0	0	NA	NA	NA
ZNF624	81.9758	130.861	157.433	101.671	0.282283	0.556036	0.779351
2022-09-02	4995.97	4745.59	3978.43	4260.69	-0.241611	0.120359	0.326409
SOHLH2	12.5241	9.73343	25.9301	19.8172	1.0397	0.293083	0.557531
MCOLN3	260.729	329.855	121.316	219.712	-0.791444	0.0466607	0.174099
MASP2	23.9096	33.5263	124.094	162.845	2.31945	6.53851e-06	0.00016239
ZNRF3	480.469	651.059	1069.62	1263.13	1.04351	2.31311e-05	0.000469767
GPATCH3	331.319	412.049	791.796	943.469	1.22278	8.28152e-07	2.72831e-05
AGL	2223.59	2258.16	1907.72	2196.26	-0.126942	0.471306	0.717153
QRICH2	51.2349	50.8302	324.127	454.071	2.93105	1.93397e-15	4.63115e-13
PSD4	103.608	135.187	101.868	35.3262	-0.801617	0.189873	0.430849
PRR20B	0	0	0	0	NA	NA	NA
CCNB1IP1	1983.36	1661.17	1614.15	1387.2	-0.280138	0.162524	0.390057
VSIG10L2	0	0	0	3.44646	3.08016	0.524579	NA
ENPP7	5.69276	2.16299	2.77823	3.44646	-0.332475	0.868485	NA
KCNG3	62.6204	38.9337	46.3038	113.733	0.658208	0.32231	0.588361
ENPEP	0	0	0	0	NA	NA	NA
OR52E1	0	0	0	0	NA	NA	NA
Human_newGene_20942	36.4337	56.2376	57.4168	12.0626	-0.418338	0.637926	0.833128
Human_newGene_23253	31.8795	43.2597	13.8911	46.5272	-0.312702	0.715686	0.877059
AD000671.2	26.1867	10.8149	92.6077	78.407	2.21193	0.00126863	0.0121227
SCT	4.55421	0	13.8911	6.03131	2.13671	0.282776	0.545427
SKI	2746.19	2541.51	3891.37	4993.92	0.748886	0.00011823	0.0018221
SHISA4	338.15	281.188	327.831	273.994	-0.0414271	0.88729	0.958567
SEC61G	2332.89	1777.97	1302.06	1545.74	-0.529358	0.0163068	0.0840431
CAPN11	3.41566	0	0	0	-3.37534	0.486912	NA
Human_newGene_24888	338.15	356.893	135.207	98.2242	-1.57531	2.09564e-06	6.03633e-05
ATXN7L3	1784.11	1809.34	2105.9	2287.59	0.29005	0.0866446	0.26479
FAIM	1030.39	1494.62	997.385	1719.78	0.105881	0.735316	0.88643
DBNDD1	725.258	643.488	723.266	532.478	-0.124559	0.625209	0.824578
SZT2	2097.21	2173.8	2380.02	2497.82	0.191673	0.241318	0.497032
ANKRD36	618.234	626.184	265.784	198.172	-1.42422	1.72309e-07	6.91131e-06
Human_newGene_11535	0	11.8964	0	6.89292	-0.785647	0.779472	0.90877
GABRP	2.2771	3.24448	0	0	-4.07093	0.305686	NA
SINHCAF	4887.81	3900.94	5349.94	3876.41	0.0700798	0.755687	0.898029
Human_newGene_14265	37.5722	40.0152	8.33469	13.7858	-1.80778	0.0338463	0.13992
AWAT2	0	0	0	0	NA	NA	NA
TACSTD2	0	0	1.85215	1.72323	3.13049	0.507096	NA
PPP2R2A	3721.93	3812.26	4237.73	2619.31	-0.135978	0.586562	0.800987
EIF3J	4217.2	4399.51	3076.43	4525.2	-0.18074	0.42119	0.678713
Human_newGene_18340	22.771	25.9558	23.1519	18.9555	-0.211602	0.802556	0.918041
ZNF541	2.2771	5.40746	0	2.58485	-1.56366	0.564854	NA
TEKT4	0	0	0	0	NA	NA	NA
PVALB	0	0	0	0	NA	NA	NA
Human_newGene_20417	9.10842	2.16299	10.1868	15.5091	1.19407	0.400551	0.659595
RTCA	691.101	618.614	829.765	784.07	0.301323	0.153206	0.377593
F10	64.8975	56.2376	75.0122	91.3312	0.458394	0.364469	0.629813
COMP	34.1566	68.134	69.4557	54.2818	0.272743	0.665047	0.848102
ZNF865	1000.79	1067.43	1678.05	1404.43	0.575494	0.00382203	0.0282844
IQCF6	0	0	0	0	NA	NA	NA
TMEM52B	593.186	712.704	538.051	579.006	-0.225435	0.331772	0.596384
SCLT1	450.867	497.487	413.956	586.76	0.0778554	0.780297	0.909355
TAL1	0	0	0	0	NA	NA	NA
ACSL1	877.824	757.045	808.465	854.723	0.0250251	0.905027	0.967167
ABCC5	2260.03	2061.33	2110.53	1884.35	-0.113359	0.523384	0.755413
RBBP7	9667.45	8809.84	11159.2	7637.36	0.0246867	0.910589	0.968349
ABL1	8314.85	8012.78	9271.88	9661.3	0.21362	0.143837	0.364704
PTPRG	185.584	148.165	125.02	136.135	-0.353211	0.343812	0.608299
Human_newGene_22010	12.5241	6.48896	5.55646	0	-1.78224	0.375362	0.639843
NCOR1	8043.87	8032.25	6926.13	7765.74	-0.12987	0.402941	0.661428
TXNRD1	21921.7	38451.4	17270.4	23544.5	-0.564809	0.0453765	0.170882
SPINK4	201.524	186.017	230.593	133.55	-0.0906171	0.821155	0.927245
CMTR1	2092.66	2180.29	2176.28	2356.52	0.0852018	0.611262	0.816169
UBE2H	5647.22	5131.68	5377.73	5185.2	-0.0291829	0.851787	0.942773
BRDT	0	0	0	0	NA	NA	NA
LRRC26	116.132	228.195	158.359	174.046	-0.0515233	0.906843	0.967572
FAM156A	1315.03	1230.74	1285.39	882.294	-0.232182	0.343579	0.608131
SLC6A8	3663.86	3256.37	3362.58	3106.12	-0.0973341	0.563578	0.785104
CCNE2	908.565	935.491	692.705	1086.5	-0.051341	0.849705	0.94174
CALCR	0	0	0	0	NA	NA	NA
CDC45	1796.64	2630.19	1412.27	1916.23	-0.411378	0.114482	0.316517
CWC22	816.342	957.121	1433.57	1716.34	0.828695	8.50093e-05	0.00138148
Human_newGene_21207	99.0541	93.0084	50.0081	47.3889	-0.979719	0.0476799	0.176587
PPP1CB	5703.01	5854.12	3973.79	4345.13	-0.47428	0.00228698	0.0191505
NRDC	8692.85	8291.8	7562.34	7919.11	-0.133667	0.365818	0.630799
ABHD8	1050.88	981.995	1245.57	1346.71	0.350859	0.0621382	0.211801
ARF5	1611.05	2013.74	1491.91	1591.4	-0.233497	0.243223	0.499074
SLC24A4	0	0	0	0	NA	NA	NA
AL049634.2	0	0	0	0	NA	NA	NA
CCT3	16580.7	13371.6	13986.5	15008.5	-0.0468351	0.790565	0.914215
ZNF121	2544.66	2223.55	2947.7	2270.36	0.130008	0.529982	0.760481
SLC5A10	6.83131	4.32597	3.70431	0.861616	-1.29443	0.51679	NA
SLC3A2	23744.5	26107.2	32301.6	28702.1	0.291239	0.0648081	0.217984
OR13A1	2.2771	6.48896	0	3.44646	-1.34019	0.602297	NA
RAD50	5501.49	5826	4750.77	5027.53	-0.212167	0.165966	0.395303
Human_newGene_4130	0	0	6.48254	0	3.98753	0.39283	NA
IER5	1390.17	1249.12	2229.99	2012.73	0.68487	0.00017867	0.00255944
MTHFD1L	3963.3	4346.52	3799.69	4029.78	-0.0859114	0.592137	0.804392
MBTPS2	3105.97	3042.24	2003.1	2162.66	-0.561509	0.000578483	0.00657307
MVK	416.71	512.628	569.537	796.994	0.556311	0.045205	0.170491
FP565260.6	527.15	602.391	715.857	868.508	0.488206	0.0367161	0.147916
RBMY1E	0	0	0	0	NA	NA	NA
FAM110D	113.855	137.35	29.6345	15.5091	-2.48024	1.45083e-05	0.000321336
NCL	21349	23282.4	21431.3	25926	0.0855357	0.617223	0.820441
PSMD10	1073.66	1075	883.477	846.106	-0.31308	0.0986906	0.287424
MOBP	0	0	0	0	NA	NA	NA
KRTAP5-3	0	0	0	0	NA	NA	NA
FAM236A	0	0	0	0	NA	NA	NA
Human_newGene_5819	108.162	61.6451	62.9732	21.5404	-1.00829	0.154243	0.378755
HRH1	314.24	178.446	297.271	143.89	-0.159628	0.73291	0.884802
C5orf30	1480.12	1348.62	1829.93	1803.36	0.361194	0.0400496	0.156454
SPANXA1	0	0	0	0	NA	NA	NA
RASGRP3	102.47	116.801	87.9773	78.407	-0.398809	0.362581	0.627467
NUDT16L1	400.77	440.168	212.998	437.701	-0.369374	0.334156	0.59881
PRKRIP1	704.764	846.809	1445.61	2454.74	1.32991	3.88363e-06	0.000103135
FBXO47	0	2.16299	0	1.72323	-0.326407	0.944424	NA
MED21	2042.56	2132.7	2018.85	2335.84	0.0607752	0.733231	0.884908
SYT11	19.3554	23.7928	24.078	41.3575	0.601397	0.46235	0.710162
NTSR2	0	0	0	0	NA	NA	NA
Human_newGene_16769	29.6024	62.7266	32.4127	28.4333	-0.603242	0.412055	0.67041
BTBD18	0	0	5.55646	6.03131	4.82716	0.104551	NA
SSU72P8	0	0	0	0	NA	NA	NA
OR2A25	0	0	0	0	NA	NA	NA
Human_newGene_13379	75.1445	40.0152	31.4866	57.7282	-0.365941	0.592214	0.804392
SPTBN2	2790.59	2399.83	2044.78	1697.38	-0.472041	0.0159302	0.0828673
LRMP	4.55421	0	1.85215	2.58485	-0.0321592	0.991036	NA
BHLHE40	2753.02	2351.17	2451.32	3082.86	0.116853	0.563306	0.785067
Human_newGene_25181	166.229	219.543	169.472	151.644	-0.26539	0.458515	0.707552
KLHL31	117.271	60.5636	17.5955	22.402	-2.15053	0.00106743	0.0105846
RNF111	1860.39	1935.87	4719.29	5760.76	1.46502	6.86854e-16	1.80654e-13
C17orf98	0	0	0	0	NA	NA	NA
PTH	0	0	0	0	NA	NA	NA
IST1	4772.81	4567.14	6970.58	7549.48	0.636599	3.41401e-05	0.000648218
KIAA0895	1324.14	1462.18	1419.68	1819.73	0.217471	0.302787	0.56758
P2RY10	0	0	1.85215	0	2.17711	0.65609	NA
NME5	0	0	0	0	NA	NA	NA
DDX21	15162.1	14925.7	13380	14963.7	-0.0861346	0.570512	0.790032
Human_newGene_7790	61.4818	98.4158	16.6694	43.0808	-1.41786	0.0440206	0.167055
LRSAM1	1453.93	1487.05	1626.19	1609.5	0.137741	0.421995	0.679692
Human_newGene_16011	6.83131	0	11.1129	8.61616	1.5361	0.425628	0.682715
CLDN34	0	0	0	2.58485	2.66592	0.583255	NA
HDAC11	208.355	401.234	513.973	509.215	0.746468	0.0365257	0.147384
VMO1	0	10.8149	5.55646	7.75454	0.296493	0.88505	0.957825
MTO1	1148.8	1308.61	1282.62	1622.42	0.241494	0.260125	0.51929
ADAR	13636.4	9394.93	13488.3	9924.09	0.0236745	0.922427	0.97282
MPIG6B	0	0	33.3388	11.201	6.76854	0.000878408	0.00913955
P2RX1	4.55421	5.40746	8.33469	4.30808	0.341396	0.833384	0.933657
HBM	2.2771	11.8964	7.40861	6.89292	0.00952615	0.995177	0.998501
EN2	193.554	154.653	343.574	396.343	1.08819	0.000383294	0.0047051
TM9SF2	4088.54	4318.4	3216.26	3847.11	-0.251162	0.153384	0.377785
INHBE	733.228	1339.97	687.149	760.807	-0.518018	0.0971924	0.285074
TCTE3	36.4337	48.6672	24.078	6.89292	-1.46268	0.107114	0.303252
TOX2	587.493	540.746	599.172	927.96	0.437174	0.122311	0.329503
Human_newGene_20603	5.69276	11.8964	7.40861	0	-1.25442	0.537894	0.766472
HBB	0	0	0	0	NA	NA	NA
MED15	2071.03	1588.71	2132.75	1998.95	0.175104	0.395305	0.65602
Human_newGene_8159	71.7288	90.8454	76.8644	67.206	-0.175205	0.722101	0.87963
CASR	0	3.24448	6.48254	2.58485	1.47358	0.560968	NA
MTPN	14147.7	13297	10943.4	10856.4	-0.3322	0.0220579	0.103691
MT1HL1	0	0	0	0	NA	NA	NA
UNC50	874.408	975.506	1017.76	1226.94	0.279132	0.187701	0.427645
IRF2	598.879	515.872	528.79	565.22	-0.0267747	0.908218	0.968094
PGR	0	0	0	1.72323	2.08249	0.670577	NA
MT-CO1	719733	624870	405183	285351	-0.961398	5.94001e-06	0.000150081
SPATA6L	4.55421	4.32597	0	1.72323	-2.35132	0.376587	NA
GPR84	0	0	0	1.72323	2.08249	0.670577	NA
ATP5F1C	5516.29	6315.92	4444.24	4590.69	-0.389157	0.0168939	0.0863751
SRPX	339.289	323.366	336.166	217.989	-0.258603	0.431096	0.686324
FGF10	0	0	0	0	NA	NA	NA
SDC3	717.288	791.653	807.539	734.958	0.0314716	0.881058	0.955659
Human_newGene_13901	464.529	537.502	902.925	762.53	0.732578	0.00163312	0.0148266
Human_newGene_12430	565.861	591.577	218.554	105.117	-1.83976	1.37114e-06	4.21429e-05
TMEM218	303.994	315.796	291.714	217.989	-0.282765	0.355281	0.620605
SOX6	43.265	148.165	76.8644	107.702	-0.0534012	0.934918	0.978014
RPUSD2	685.409	696.481	1017.76	856.446	0.439416	0.0397172	0.155686
Human_newGene_10319	0	0	0	0	NA	NA	NA
ZSCAN31	233.403	209.81	231.519	184.386	-0.0920509	0.778485	0.908232
MAPK11	496.409	465.042	422.291	354.124	-0.308638	0.221158	0.47213
TBC1D22A	1004.2	1077.17	1081.66	1033.94	0.0233931	0.901705	0.965514
Human_newGene_8563	40.9879	27.0373	15.7433	7.75454	-1.53605	0.0943086	0.279468
Human_newGene_4101	0	8.65194	0	0	-4.71972	0.258983	NA
COL4A6	55.7891	34.6078	50.9342	75.8222	0.489632	0.430919	0.686152
Human_newGene_2611	125.241	102.742	95.3859	88.7464	-0.307983	0.472771	0.718101
NAB1	2915.83	2516.63	2571.71	3317.22	0.116554	0.569921	0.789758
ASIC4	2.2771	0	4.63038	0	1.02589	0.788487	NA
Human_newGene_10341	34309.1	41318.4	36875.4	47559.5	0.15893	0.419585	0.676972
TSPAN18	5.69276	8.65194	8.33469	0	-0.78905	0.708191	0.872741
TRMT10A	360.921	308.225	302.827	316.213	-0.11193	0.682217	0.858264
ZNF559-ZNF177	31.8795	35.6893	40.7474	45.6656	0.354876	0.591658	0.804114
MED31	310.825	441.249	269.488	287.78	-0.432805	0.156557	0.382035
ZNF532	587.493	541.828	764.013	387.727	0.027957	0.936074	0.978106
PLG	0	0	1.85215	5.16969	4.1055	0.25906	NA
LBHD1	281.222	519.117	433.404	601.408	0.370438	0.306361	0.571766
CAPSL	0	0	0	2.58485	2.66592	0.583255	NA
ASB14	72.8674	41.0967	54.6385	53.4202	-0.0756848	0.900581	0.965108
CA8	19.3554	37.8522	32.4127	38.7727	0.314211	0.684448	0.859779
LAMTOR4	1095.29	1255.61	1014.05	877.986	-0.313559	0.129259	0.340084
IL36RN	0	0	0	0	NA	NA	NA
C1orf232	0	0	0	0	NA	NA	NA
FBLN7	285.777	273.618	203.737	196.448	-0.483221	0.101493	0.292449
SLFN11	2.2771	10.8149	14.8172	5.16969	0.604856	0.694445	0.865169
POLR2J3	252.759	68.134	124.094	70.6525	-0.720401	0.268148	0.528912
NOL7	4107.9	5478.84	4165.49	5457.47	0.00544461	0.9807	0.992388
Human_newGene_23366	922.228	818.69	673.258	495.429	-0.575267	0.021321	0.101559
BRMS1L	385.969	478.02	436.182	782.347	0.496271	0.143126	0.363456
PANK2	605.71	608.88	1978.1	1058.93	1.32198	2.2207e-05	0.000452718
ICAM3	214.048	193.587	223.184	211.096	0.0914322	0.770721	0.905058
TCP11X1	0	0	0	0	NA	NA	NA
TAF8	824.312	1058.78	1264.09	1406.16	0.50372	0.021794	0.102903
RNF139	923.366	930.084	1643.79	1751.66	0.873437	1.23683e-06	3.84566e-05
ZNF594	748.029	833.831	488.968	594.515	-0.545732	0.0185945	0.0924481
ADAM8	2.2771	15.1409	67.6036	62.8979	2.8979	0.00167958	0.0151435
SFTPC	26.1867	41.0967	29.6345	24.1252	-0.325317	0.670912	0.850784
MAN2B2	1837.62	1534.64	1716.95	1682.74	0.0117944	0.950233	0.982632
RGS12	630.758	651.059	903.851	838.352	0.442572	0.030743	0.131138
EIF1AY	0	0	0	0	NA	NA	NA
Human_newGene_22615	3559.12	2702.65	1525.25	2277.25	-0.719411	0.0049108	0.0344809
LRRIQ1	17.0783	16.2224	16.6694	17.2323	0.0260497	0.978513	0.991875
Human_newGene_3813	11.3855	11.8964	8.33469	10.3394	-0.317519	0.792386	0.914891
GPR150	0	0	0	3.44646	3.08016	0.524579	NA
MFSD14C	2364.77	2252.75	1701.2	1623.28	-0.474004	0.00465911	0.0332373
PRRG3	4.55421	2.16299	5.55646	128.381	4.32262	0.00145722	0.013483
SAA4	0	0	0	0	NA	NA	NA
RAPGEF5	143.458	89.7639	118.538	104.255	-0.0654469	0.88488	0.957704
CHP1	4614.55	4099.94	4471.1	4444.21	0.032911	0.837811	0.93554
ZCCHC2	983.709	1081.49	1167.78	1140.78	0.160575	0.396293	0.656628
Human_newGene_16929	13.6626	18.3854	5.55646	13.7858	-0.726005	0.534543	0.764144
ACAP2	2421.7	2039.7	2090.15	2388.4	0.00570712	0.976129	0.9916
PPP4R2	2433.09	2281.95	3351.47	4270.17	0.692943	0.000391652	0.00479303
AC135068.1	0	0	0	0	NA	NA	NA
CDCA2	1376.51	1347.54	2934.74	3690.3	1.28228	3.8997e-11	4.19911e-09
PTGFRN	2009.55	1543.29	1686.39	1413.91	-0.196547	0.372369	0.637054
OR4D5	0	0	0	0	NA	NA	NA
C1orf194	0	0	0	0	NA	NA	NA
SIGLEC5	0	0	0	0	NA	NA	NA
OR51C1P	0	0	0	0	NA	NA	NA
GUCD1	2404.62	2101.34	2651.36	2473.7	0.185772	0.290264	0.554141
Human_newGene_1988	3.41566	12.9779	50.0081	66.3444	2.82105	0.00153819	0.014078
LRRN4CL	0	2.16299	34.2648	25.8485	4.77271	0.0015271	0.0140004
NMUR2	0	3.24448	4.63038	0	0.506034	0.889517	NA
KIAA1586	790.155	641.325	563.055	458.379	-0.487021	0.0518156	0.187321
DAGLA	292.608	482.346	437.108	469.58	0.226049	0.479737	0.722071
NEUROD6	0	0	0	0	NA	NA	NA
GPR32	3.41566	0	0	3.44646	0.0202832	0.995751	NA
CHCHD6	520.318	600.228	443.591	416.16	-0.38253	0.108825	0.306206
SLC2A4RG	3746.98	4603.91	3713.57	3605.86	-0.190276	0.291456	0.555409
FBXL3	1385.62	1828.8	2878.25	4131.45	1.12475	5.78442e-06	0.000147076
CA5B	5262.39	3962.59	3487.6	2539.18	-0.6142	0.00899884	0.0539325
MPHOSPH9	1358.29	1229.66	1251.13	1167.49	-0.0976122	0.602597	0.811429
KIZ	701.348	598.065	855.695	727.204	0.284714	0.213529	0.46278
Human_newGene_4149	0	0	0	0	NA	NA	NA
PLPP1	1128.31	998.218	1027.02	971.902	-0.089217	0.649815	0.840358
Human_newGene_17610	14.8012	21.6299	10.1868	21.5404	-0.198197	0.846777	0.940187
HCN4	126.379	179.528	228.741	379.111	0.990541	0.0127817	0.0704231
CEACAM19	64.8975	35.6893	205.589	230.051	2.11704	3.11536e-06	8.54408e-05
SH2D4B	0	0	0	2.58485	2.66592	0.583255	NA
TGM4	5.69276	9.73343	4.63038	11.201	0.0385002	0.978743	0.991875
Human_newGene_24972	126.379	184.935	47.2299	58.5899	-1.5564	0.000832699	0.00878358
AC010616.1	6.83131	0	5.55646	3.44646	0.401776	0.863801	NA
TBC1D15	2028.9	1822.32	2383.72	2827.82	0.436555	0.0197562	0.0965189
LYPD2	2.2771	0	5.55646	1.72323	1.68344	0.549778	NA
FAM168A	3191.36	2392.26	3228.3	3164.71	0.195394	0.335329	0.600046
ZNF830	766.246	697.563	782.535	531.617	-0.15591	0.561382	0.783405
MRPS21	2035.73	2139.19	1995.7	1840.41	-0.122213	0.473317	0.718557
NONO	27346.9	20098.5	17584.3	19301	-0.363197	0.0686975	0.226553
CLEC5A	0	0	0	0	NA	NA	NA
ITCH	3772.02	3411.03	5158.25	3600.69	0.286103	0.195917	0.438885
MGAT3	15.9397	2.16299	0	6.89292	-1.38552	0.5188	0.752453
AC008676.3	0	0	1.85215	0	2.17711	0.65609	NA
MBP	2221.32	2717.79	3261.64	3632.57	0.481081	0.0107638	0.0617076
GTF2H2C	526.011	673.77	709.375	805.611	0.336376	0.164169	0.392597
RPP25	900.595	1495.7	1301.14	2741.66	0.754542	0.0411329	0.159457
SOSTDC1	4.55421	0	0	0	-3.79091	0.433248	NA
HRC	0	0	9.26077	0	4.50222	0.273167	NA
TRIM48	0	0	0	0	NA	NA	NA
LRRC74A	0	0	0	0	NA	NA	NA
HOXC11	606.848	622.94	453.778	523.001	-0.332076	0.148383	0.371559
DOK5	0	0	0	0	NA	NA	NA
HELZ	3649.06	3157.96	4527.59	5079.22	0.497132	0.00443564	0.0319726
ADRB3	0	0	0	0	NA	NA	NA
PTRH2	874.408	797.06	915.89	944.331	0.154518	0.436024	0.689218
MPEG1	0	0	5.55646	0	3.76501	0.434696	NA
DMD	1609.91	1699.03	1498.39	2025.66	0.0910116	0.675274	0.853549
NDUFA12	1172.71	1500.03	611.211	784.932	-0.936716	0.000111087	0.00172034
KRTAP2-4	0	0	0	0.861616	1.11459	0.823421	NA
STAMBPL1	132.072	124.372	127.799	122.349	-0.035841	0.925572	0.974107
ADCY2	0	0	0	0	NA	NA	NA
KLHL20	641.005	770.023	1071.47	1330.33	0.767333	0.000816484	0.00865236
SRM	1896.83	2086.2	1557.66	1456.99	-0.402008	0.0229886	0.106752
AC008750.8	7.96987	21.6299	13.8911	12.9242	-0.144804	0.897909	0.96368
OTC	2.2771	6.48896	0	1.72323	-2.33469	0.390258	NA
ANKRD33B	2461.55	2197.59	3292.2	3351.68	0.512047	0.00209245	0.0179143
MPC1L	0	0	0	0	NA	NA	NA
TMIE	6.83131	3.24448	0	0	-4.93756	0.118893	NA
SNX8	1266.07	1533.56	1714.17	2003.26	0.409028	0.0451572	0.170351
LIPK	0	0	0	0	NA	NA	NA
NUTM2E	40.9879	18.3854	52.7864	94.7777	1.31633	0.0629551	0.213832
Human_newGene_5623	0	3.24448	4.63038	17.2323	2.74273	0.173205	0.405974
CHURC1	808.372	975.506	733.453	924.513	-0.105521	0.654734	0.841964
ANKRD20A4	0	0	0	1.72323	2.08249	0.670577	NA
AC010463.1	0	0	0	0	NA	NA	NA
SELENON	2665.35	2316.56	2404.09	1824.04	-0.236763	0.264345	0.523987
TMEM272	2.2771	0	6.48254	5.16969	2.36637	0.32571	NA
KLC2	2315.82	2232.2	3057.91	3088.89	0.434631	0.00619458	0.0408659
HDAC1	4681.73	4884.02	3960.83	4404.58	-0.193409	0.22659	0.478785
ELMOD3	327.903	329.855	379.691	430.808	0.301472	0.243019	0.498825
Human_newGene_14860	111.578	76.786	53.7124	44.804	-0.935092	0.0767022	0.243878
ATP5MPL	1111.23	1182.07	983.493	1016.71	-0.1973	0.291912	0.555927
FNDC3B	2533.28	2283.03	2410.58	2816.62	0.118252	0.516238	0.750744
MTCP1	187.861	202.239	178.733	128.381	-0.345963	0.344986	0.609359
VMA21	3416.8	3584.07	2380.02	2218.66	-0.606392	0.000176869	0.00253591
WFDC10B	0	0	0	0	NA	NA	NA
JAKMIP3	339.289	299.573	212.072	201.618	-0.626895	0.0309777	0.131832
PCDHGB3	45.5421	30.2818	24.078	6.03131	-1.33594	0.166748	0.396659
CAV2	1801.19	1876.39	1425.23	1220.91	-0.475055	0.0109838	0.0625793
ATRNL1	0	4.32597	10.1868	8.61616	2.11062	0.287147	0.550472
AREL1	2248.64	1927.22	2195.73	1998.95	0.00651454	0.971773	0.990488
SUN3	0	3.24448	0	0	-3.3058	0.496237	NA
Human_newGene_18607	17.0783	4.32597	10.1868	1.72323	-0.848253	0.596091	0.806722
MED26	548.782	603.473	2903.25	3350.82	2.44021	4.01268e-38	1.60949e-34
Human_newGene_7218	81.9758	96.2529	66.6775	39.6343	-0.74721	0.172412	0.404677
Human_newGene_10848	1515.41	1972.64	1133.52	2143.7	-0.0898323	0.775298	0.906902
DUS1L	2096.08	2596.66	2041.07	2181.61	-0.152334	0.428199	0.683995
NEK9	8084.86	7820.27	6423.27	6581.02	-0.290488	0.047065	0.175078
KDM2B	1378.79	1464.34	1300.21	1773.2	0.112524	0.613918	0.817731
CHRM3	0	0	0	1.72323	2.08249	0.670577	NA
WARS2	1318.44	1128	1177.04	1139.06	-0.0788807	0.686208	0.86032
USP50	0	0	3.70431	1.72323	3.73189	0.351203	NA
NEURL1B	3317.74	2528.53	2640.24	1714.61	-0.42497	0.104483	0.298332
RIMKLA	12.5241	18.3854	18.5215	26.7101	0.549052	0.561336	0.783405
TBX22	2.2771	0	0	0	-2.78936	0.568379	NA
ASF1A	1283.15	1633.05	1280.76	1687.04	0.0253415	0.914253	0.969755
TOMM40	2540.11	3412.11	2788.42	4216.75	0.235013	0.362949	0.627969
TUBGCP5	1139.69	1139.89	990.902	1110.62	-0.117191	0.540339	0.768244
IGSF6	89.9456	38.9337	77.7904	31.0182	-0.244678	0.738038	0.887505
Human_newGene_15453	109.301	114.638	167.62	136.135	0.439236	0.259238	0.518541
TPPP	1444.82	1175.58	1602.11	1505.24	0.246015	0.219422	0.470077
RGPD3	20.4939	37.8522	93.5337	67.206	1.45949	0.0220467	0.103669
GSTM5	0	0	0	0	NA	NA	NA
BTD	867.577	687.829	552.868	561.773	-0.480453	0.0398256	0.155958
SNRPB2	1295.67	1249.12	1072.4	1301.04	-0.100348	0.618213	0.820654
PDCD1LG2	0	0	0	0	NA	NA	NA
MBOAT7	2868.01	2585.85	3018.08	1743.91	-0.195836	0.474653	0.719299
ERICH1	586.355	462.879	504.712	436.839	-0.156161	0.54643	0.772173
APOA4	0	0	0	0	NA	NA	NA
Human_newGene_1162	741.198	395.826	300.049	106.84	-1.48327	0.0029223	0.0230962
KRTAP19-8	0	0	0	0	NA	NA	NA
HOXA11	421.264	510.465	392.656	475.612	-0.101714	0.700507	0.868475
SLC25A51	727.535	494.242	526.938	436.839	-0.342113	0.234535	0.488875
RAB28	1093.01	1045.8	980.715	927.098	-0.164921	0.384813	0.647571
MKX	1607.64	1600.61	1541.92	1710.31	0.0197448	0.91129	0.968499
HAUS7	715.011	830.586	419.513	402.374	-0.911407	6.34226e-05	0.0010825
OR2M3	0	0	0	0	NA	NA	NA
PRXL2B	528.288	256.314	205.589	183.524	-1.01147	0.0121953	0.0678203
PKP3	1472.15	1713.08	1709.54	1827.49	0.151074	0.417063	0.675417
SH3GL2	2845.24	3334.24	1893.83	2096.31	-0.63104	0.000533867	0.00614004
RPN2	22792.7	23060.7	18679	18493.7	-0.302787	0.0302916	0.129738
CTSO	2.2771	4.32597	0	0	-4.32927	0.243747	NA
SFMBT1	1475.56	1474.07	1966.99	2326.36	0.541677	0.00347116	0.0262694
CLBA1	358.644	390.419	415.808	452.348	0.212868	0.392962	0.654216
Human_newGene_8326	163.952	133.024	103.721	59.4515	-0.865095	0.0670286	0.223021
GOLGA8R	39.8493	6.48896	29.6345	9.47777	-0.244508	0.836063	0.934742
HSF5	0	0	0	0	NA	NA	NA
AC131097.2	0	3.24448	0	0	-3.3058	0.496237	NA
TTC9B	0	0	12.9651	17.2323	6.20923	0.00431955	0.0312738
UPF2	2026.62	2075.38	3137.55	4216.75	0.842337	4.37153e-05	0.000797916
SORBS3	1945.79	2101.34	2306.86	1992.06	0.0869238	0.631693	0.828894
CD101	6.83131	6.48896	32.4127	45.6656	2.55222	0.00591086	0.0394976
C4BPA	229.988	170.876	150.024	103.394	-0.66206	0.0985475	0.287263
ALB	0	2.16299	0	0	-2.72193	0.578153	NA
JPH1	1208	892.231	1170.56	1113.21	0.121057	0.596817	0.807075
AGBL2	3.41566	11.8964	6.48254	3.44646	-0.629541	0.698726	0.867272
TERF1	1071.38	949.551	882.551	1190.75	0.0372566	0.874275	0.95327
KIF22	2888.51	2704.81	3237.56	3565.37	0.282538	0.0874219	0.266353
GSE1	4943.59	7798.64	6353.81	5805.57	-0.0676132	0.779113	0.908635
ACTBL2	0	0	0	0	NA	NA	NA
NINJ1	1455.07	1872.06	1802.15	1986.02	0.187129	0.366594	0.631415
LY6L	0	0	0	0	NA	NA	NA
SEC61A2	641.005	662.955	659.367	636.734	-0.00883089	0.966525	0.988331
Human_newGene_9336	19.3554	7.57045	17.5955	15.5091	0.300003	0.783743	0.911657
Human_newGene_19634	2.2771	0	0	8.61616	1.9285	0.559604	NA
ZNF703	689.963	909.535	1659.53	2124.74	1.24226	2.01391e-07	7.97805e-06
UCP3	15.9397	2.16299	62.9732	112.872	3.28828	0.000263191	0.003471
SFXN4	546.505	789.49	498.229	568.666	-0.324647	0.23514	0.489438
HIST1H1D	0	0	0	4.30808	3.40159	0.481232	NA
MYL6B	1026.97	1039.31	875.142	670.337	-0.419319	0.0645908	0.217516
TREM1	0	0	0	0	NA	NA	NA
OST4	1235.33	1747.69	1491.91	1353.6	-0.0683288	0.770113	0.905058
VAMP7	1653.18	1584.39	1034.43	1427.7	-0.394737	0.0804165	0.252063
OR52E6	0	0	0	0	NA	NA	NA
CKMT2	11.3855	12.9779	16.6694	6.89292	-0.0509791	0.96593	0.988164
SLC13A3	0	2.16299	2.77823	3.44646	1.51681	0.60001	NA
HLA-C	7439.3	7545.57	7193.76	5614.29	-0.226513	0.221053	0.472066
BBIP1	383.692	363.382	295.418	250.73	-0.452257	0.0992736	0.288412
N4BP2L1	25.0482	50.8302	151.877	115.456	1.81423	0.00108612	0.010717
ELOB	1822.82	2588.01	2717.11	2358.24	0.202276	0.376201	0.640536
TIMP4	273.253	408.804	222.258	170.6	-0.796816	0.0229334	0.106589
SLIT2	12.5241	4.32597	17.5955	18.0939	1.08617	0.356338	0.621694
HAUS3	1640.65	1487.05	2493.92	2704.61	0.733137	2.7023e-05	0.000531971
RSF1	1971.97	2066.73	3305.17	3720.46	0.798757	2.38671e-06	6.7535e-05
MYLK3	2815.64	3573.25	1683.61	2576.23	-0.58467	0.0219927	0.103536
Human_newGene_18882	109.301	99.4973	93.5337	42.2192	-0.622702	0.26734	0.527967
MON1A	334.734	357.974	493.599	556.604	0.600401	0.0147692	0.0781062
LONRF1	943.86	1019.85	830.691	903.835	-0.179005	0.366825	0.63161
CCP110	1622.44	1559.51	1994.77	2420.28	0.472665	0.0129246	0.0710145
C2orf88	27.3253	4.32597	11.1129	1.72323	-1.30488	0.395004	0.655982
CACNG6	47.8192	49.7487	28.7084	16.3707	-1.11618	0.123825	0.331554
CEP128	603.433	604.554	557.498	684.123	0.0399118	0.864122	0.948158
TAF11L14	0	0	0	0	NA	NA	NA
LRIT3	0	0	1.85215	1.72323	3.13049	0.507096	NA
HMGXB3	5626.73	5204.14	6256.57	7472.79	0.342178	0.0481839	0.178043
ZSWIM3	614.818	619.695	521.381	402.374	-0.418798	0.0944617	0.279724
DPPA4	0	0	0	0	NA	NA	NA
ZNF804A	0	0	0	0	NA	NA	NA
CCIN	6.83131	0	1.85215	0	-1.88879	0.59366	NA
WDR83	257.313	246.58	283.379	317.936	0.255326	0.369248	0.634145
SLC25A31	0	0	0	0	NA	NA	NA
KCNMB4	68.3131	44.3412	45.3778	48.2505	-0.265825	0.659764	0.845129
C19orf85	0	0	0	0	NA	NA	NA
DENND6B	81.9758	78.949	73.1601	51.6969	-0.367031	0.477485	0.720539
CGB8	0	3.24448	4.63038	4.30808	1.45418	0.561946	NA
GALNS	1253.55	1105.29	1219.64	1115.79	-0.0143589	0.941272	0.979516
STX6	2077.86	1953.18	2438.36	2732.18	0.359281	0.0376234	0.150285
HIST1H1C	1757.93	1070.68	1265.95	674.645	-0.543719	0.121875	0.328577
KRTAP9-9	0	0	0	0	NA	NA	NA
CIDEB	35.2951	52.9931	47.2299	24.9869	-0.29223	0.684977	0.859909
CT47A1	0	0	0	0	NA	NA	NA
PDK3	1168.15	738.66	754.752	629.841	-0.461607	0.105203	0.299665
KCNJ11	51.2349	38.9337	50.9342	26.7101	-0.216815	0.756353	0.898218
CASP4	118.409	140.594	50.0081	68.9292	-1.12188	0.0160405	0.0831244
Human_newGene_19406	56.9276	50.8302	69.4557	42.2192	0.0505708	0.932884	0.976843
TPR	13957.5	11772	10681.4	11683.5	-0.202159	0.231753	0.485474
ZSCAN20	235.68	292.003	416.734	375.664	0.585968	0.0379773	0.151095
MTX2	996.233	840.32	1145.56	1092.53	0.285403	0.161635	0.388849
HIST1H2BH	107.024	42.1782	7.40861	19.8172	-2.44912	0.00328524	0.0252314
LYRM7	1122.61	1055.54	796.426	628.118	-0.612877	0.00583601	0.0391606
BRD3	3846.03	4134.55	4835.05	5207.6	0.331573	0.0360992	0.146227
HIST1H2BO	45.5421	32.4448	78.7165	49.1121	0.712885	0.258326	0.517584
OR2T6	0	0	0	0	NA	NA	NA
SLC45A1	38.7108	34.6078	34.2648	32.7414	-0.129747	0.850226	0.941831
SERPINA3	0	0	0	0	NA	NA	NA
MAJIN	0	0	0	0	NA	NA	NA
MAGEB10	0	0	0	0	NA	NA	NA
SMIM39	0	2.16299	0	0.861616	-1.29438	0.791329	NA
Human_newGene_21545	42.1264	70.297	55.5646	68.0676	0.136492	0.816524	0.924902
FBXO39	0	0	0	0	NA	NA	NA
KCNJ16	0	0	0	0	NA	NA	NA
AL135905.2	6693.55	7424.45	5014.7	5715.1	-0.395892	0.0177714	0.0897465
PABPC1L2B	0	0	0	0	NA	NA	NA
Human_newGene_3932	102.47	70.297	18.5215	40.4959	-1.54643	0.01806	0.09069
KRT79	0	0	0	0	NA	NA	NA
FABP2	0	0	0	0	NA	NA	NA
ZNF57	235.68	218.462	541.755	429.085	1.09596	9.36095e-05	0.00149143
Human_newGene_22746	0	0	0	3.44646	3.08016	0.524579	NA
FBXL4	1058.85	885.743	969.602	907.281	-0.0510314	0.807105	0.919948
CLEC9A	0	0	0	0	NA	NA	NA
UGT8	0	0	1.85215	1.72323	3.13049	0.507096	NA
BMP2K	1205.73	1161.52	2061.45	2401.32	0.914864	7.79974e-07	2.59087e-05
SLC25A23	2857.77	2515.55	2539.3	1876.6	-0.283203	0.189254	0.429963
MAPK4	789.017	922.513	681.592	785.793	-0.222006	0.315003	0.581037
HINT1	6765.28	7010.24	6663.12	5721.99	-0.153551	0.350435	0.615342
SFXN5	485.023	646.733	572.315	627.256	0.0837403	0.742229	0.890208
KRTAP13-1	0	0	0	0	NA	NA	NA
CHCHD2	12639.1	14569.9	11061.1	11525	-0.268661	0.0914156	0.273992
FAM3D	0	0	0	0	NA	NA	NA
NDP	0	0	0	0	NA	NA	NA
SLC4A4	0	0	0.926077	1.72323	2.69909	0.578447	NA
RHOBTB1	1844.46	1875.31	905.703	1010.68	-0.956676	1.56914e-07	6.38372e-06
RPL38	7047.64	6903.17	6470.5	5566.9	-0.212866	0.193097	0.435487
Human_newGene_19053	3.41566	1.08149	2.77823	12.0626	1.72971	0.371759	0.636625
Human_newGene_15572	4294.62	2910.3	1927.17	1625.01	-1.02028	2.0106e-05	0.000415163
KAZN	641.005	553.724	583.428	557.465	-0.0663929	0.770243	0.905058
Human_newGene_23235	621.65	678.096	483.412	539.371	-0.345638	0.126145	0.334691
AP2A2	3136.71	2835.67	2997.71	2921.74	-0.0128065	0.937708	0.978828
ZBTB46	1868.36	1918.57	1718.8	1892.11	-0.0686025	0.691717	0.863919
MAP7D1	2979.59	3335.32	4147.9	4532.96	0.459055	0.00608927	0.0404555
AOX1	0	0	2.77823	0	2.7635	0.569164	NA
CYR61	4547.38	2622.62	5169.36	4570.01	0.441927	0.100969	0.291567
JRKL	1085.04	865.194	560.276	262.793	-1.24512	0.000644642	0.00719237
Human_newGene_22781	40.9879	29.2003	32.4127	2.58485	-1.00712	0.385492	0.64812
DTNA	11.3855	0	4.63038	1.72323	-0.841256	0.721993	0.879627
TMOD3	8014.27	7836.5	7034.48	7179.84	-0.157195	0.279264	0.541681
EEA1	1675.95	1488.13	1377.08	1706	-0.037181	0.855954	0.943957
AL513165.2	9.10842	5.40746	4.63038	9.47777	-0.0375719	0.979762	0.992189
ADCK5	241.373	227.113	200.033	167.153	-0.351844	0.274564	0.535965
PLK5	0	3.24448	3.70431	15.5091	2.55729	0.223966	0.475368
KLK3	0	0	0	0	NA	NA	NA
IL1R1	20.4939	14.0594	3.70431	7.75454	-1.58799	0.1955	0.438318
AC091167.7	0	8.65194	0	21.5404	1.31437	0.601181	0.81026
KTN1	17015.7	15581.1	12579.8	14128.8	-0.287397	0.0690384	0.227397
FABP9	0	0	0	0	NA	NA	NA
RELL2	420.126	460.716	438.96	350.678	-0.158213	0.549594	0.774669
Human_newGene_21670	3346.21	2625.86	1811.41	1040.83	-1.06632	0.000212656	0.00294634
MAB21L1	2.2771	0	0	0	-2.78936	0.568379	NA
Human_newGene_19350	193.554	161.142	193.55	211.957	0.193726	0.563543	0.785104
PHKB	5548.17	5629.17	4182.16	4069.41	-0.437855	0.00337428	0.0257183
ADAM2	0	0	0	0	NA	NA	NA
TBC1D8B	186.723	155.735	215.776	154.229	0.111306	0.764785	0.90262
LAPTM4B	2494.57	2569.63	2119.79	2181.61	-0.235521	0.14486	0.365897
TMEM147	1149.94	1450.28	1117.77	1113.21	-0.221133	0.29017	0.554027
LCN8	1.13855	0	0	0	-1.78223	0.721131	NA
Human_newGene_18993	3815.29	4548.76	4374.79	2428.89	-0.298009	0.293336	0.557869
MRTFB	2450.16	1684.97	2655.99	2524.53	0.325293	0.154799	0.379465
Human_newGene_20475	48.9578	48.6672	55.5646	116.318	0.817253	0.175011	0.408743
SYT4	0	0	0	0	NA	NA	NA
GGT5	0	0	3.70431	0	3.17928	0.511	NA
XPO7	6551.23	6417.58	6196.38	6059.74	-0.0815453	0.578336	0.795442
C10orf142	0	0	0	0	NA	NA	NA
GPR75	86.53	87.6009	198.18	188.694	1.15156	0.00198586	0.0172036
TRIM5	250.482	166.55	184.289	371.356	0.415053	0.343425	0.608024
APOC1	5.69276	16.2224	4.63038	7.75454	-0.823332	0.560299	0.782915
RNASE4	309.686	136.268	258.375	119.765	-0.238112	0.652871	0.84127
Human_newGene_7401	286.915	284.433	660.293	703.078	1.25485	8.24201e-08	3.75667e-06
PARD6B	568.138	685.666	1543.77	1625.87	1.33775	6.66916e-11	6.94805e-09
ARID1A	3589.86	3960.43	6261.2	7462.45	0.862067	9.82096e-07	3.15135e-05
ARHGAP11B	121.825	127.616	126.872	117.18	-0.0318247	0.93477	0.978014
SIGLECL1	0	0	0	0	NA	NA	NA
TPD52L3	0	0	0	0	NA	NA	NA
RRAGB	426.957	512.628	355.613	365.325	-0.382347	0.134241	0.348435
SLC38A11	0	0	0	0	NA	NA	NA
RCN2	4021.37	3917.17	3362.58	3273.28	-0.258593	0.0919087	0.274797
HIST2H2BE	674.023	219.543	313.014	114.595	-1.06361	0.0677114	0.224455
STARD7	5972.85	6747.43	7424.36	8889.29	0.358957	0.0430934	0.164892
JHY	194.692	273.618	297.271	337.753	0.438952	0.171269	0.402978
Human_newGene_3896	5.69276	0	7.40861	0	0.380397	0.902821	NA
SHMT2	11637.1	13262.3	11926.9	12302.1	-0.0393892	0.801239	0.917688
MLYCD	733.228	695.4	690.853	554.019	-0.198891	0.392144	0.653532
UQCRH	6907.6	6504.1	4973.03	4894.84	-0.442671	0.00317655	0.0246402
SDHA	20498.5	19803.2	19187.4	18753.1	-0.0871037	0.537799	0.766472
OR6C3	0	0	0	0	NA	NA	NA
NCLN	2234.98	2708.06	2139.24	1546.6	-0.423627	0.0656087	0.220076
MEDAG	0	0	0	0	NA	NA	NA
ZNF17	447.451	361.219	325.979	249.869	-0.490107	0.0997847	0.289397
ZNF280D	384.831	360.137	337.092	376.526	-0.0616869	0.811411	0.922257
RCBTB2	47.8192	103.823	85.1991	151.644	0.642746	0.268762	0.529667
VEGFB	1104.4	1119.34	1188.16	843.522	-0.13061	0.584387	0.800034
COLQ	52.3734	27.0373	39.8213	48.2505	0.151191	0.82791	0.930802
Human_newGene_23263	433.789	274.699	221.332	104.255	-1.12247	0.0122055	0.06783
DRG2	1213.7	1255.61	1350.22	1298.45	0.101081	0.572658	0.791704
AL354761.1	0	0	0	0	NA	NA	NA
KLRB1	11.3855	0	0.926077	0	-3.6437	0.266571	NA
DNASE2B	0	0	3.70431	0	3.17928	0.511	NA
ALPK2	6867.75	6420.82	5288.82	3977.22	-0.520225	0.00844616	0.051252
SAFB	4595.2	5010.56	6479.76	10029.2	0.781311	0.000934733	0.00956432
PAGE3	0	0	0	0	NA	NA	NA
SRSF12	2.2771	0	17.5955	11.201	3.67752	0.0464282	0.173554
NSUN4	901.734	501.813	1161.3	1372.55	0.852692	0.0054422	0.0372919
RFX2	265.283	301.736	585.28	592.791	1.05467	1.78401e-05	0.000379107
MAPK8IP1	504.379	693.237	662.145	676.368	0.160143	0.527845	0.758542
Human_newGene_12516	158.259	115.72	87.0512	93.9161	-0.597572	0.161065	0.388066
Human_newGene_21709	193.554	227.113	151.877	177.493	-0.35286	0.298766	0.563566
FANCD2	3756.08	3822	2896.77	3067.35	-0.345493	0.0270923	0.120305
ANKZF1	1517.69	1280.49	1620.63	1141.64	-0.0187496	0.938407	0.979112
DUSP8	362.06	455.308	732.527	971.041	1.0594	6.83652e-05	0.00115337
SENP5	564.722	1052.29	1773.44	1977.41	1.21357	6.29945e-05	0.00107749
LBR	2605.01	5024.62	2699.51	5022.36	0.0173419	0.97794	0.991875
IGFL1	0	0	0	0	NA	NA	NA
LZTS2	1443.68	1347.54	1556.73	1262.27	0.0141619	0.944217	0.980583
IL2RG	0	4.32597	26.8562	9.47777	3.05735	0.0696792	0.22871
CCDC51	1087.32	1304.28	1091.84	1061.51	-0.15158	0.451578	0.701885
KLF3	2436.5	2458.23	2926.4	4101.29	0.521917	0.0154931	0.0811254
KCTD14	2.2771	0	4.63038	1.72323	1.48683	0.608863	NA
FZR1	844.806	1091.23	1979.95	2218.66	1.11662	1.59685e-07	6.46965e-06
ANKRD37	79.6987	32.4448	110.203	101.671	0.919542	0.119162	0.324536
SLC44A4	0	0	4.63038	3.44646	4.30595	0.206531	NA
ESPL1	3957.61	4015.58	4019.17	4323.59	0.0653963	0.67376	0.852508
GMPR2	1098.7	1051.21	938.116	941.746	-0.193597	0.303045	0.56788
TBC1D19	317.656	479.101	232.445	338.615	-0.480339	0.167481	0.397612
ERGIC1	15216.8	14877	11942.7	9849.13	-0.465706	0.0058928	0.0394098
ERBB4	66.036	33.5263	65.7514	57.7282	0.31175	0.617615	0.820654
TSPAN32	0	0	0.926077	0	1.16711	0.815114	NA
MAP4	13771.9	15116	13916.2	18736.7	0.176756	0.371273	0.636196
OR2T33	0	0	0	0	NA	NA	NA
GPHN	516.903	675.933	661.219	735.82	0.227787	0.354967	0.620313
SLC6A2	0	0	0	0	NA	NA	NA
C3orf85	0	0	0	0	NA	NA	NA
ORC3	1311.61	1251.29	985.346	1188.17	-0.237505	0.239189	0.494656
HIVEP1	1093.01	1576.82	1805.85	948.639	0.0447362	0.893091	0.961145
EIF4EBP2	3929.14	3479.16	4378.49	4669.09	0.288466	0.0804811	0.252063
DFFB	245.927	364.463	201.885	185.247	-0.657566	0.0530332	0.190393
DMRT1	0	0	0	6.03131	3.88645	0.41687	NA
ANKRD34B	0	0	0	0	NA	NA	NA
HSPB6	21.6325	52.9931	111.129	109.425	1.56089	0.00980215	0.0575854
IER2	2406.9	1328.07	1461.35	697.909	-0.790687	0.03889	0.153267
AIFM1	3177.7	3371.01	2526.34	2912.26	-0.267917	0.120264	0.326319
WWC2	2420.56	2326.29	1934.57	2372.89	-0.139984	0.457688	0.706707
Human_newGene_14448	5.69276	0	0	0	-4.11316	0.394151	NA
MRPL4	2019.79	2011.58	2318.9	2688.24	0.312811	0.0763189	0.242949
EPB41L4A	1642.93	1716.33	1534.51	1442.34	-0.174458	0.317004	0.583215
SH2D6	66.036	80.0305	27.7823	24.1252	-1.49362	0.0133766	0.0726765
RIDA	315.379	354.73	338.944	345.508	0.0303805	0.908357	0.968094
Human_newGene_13903	26.1867	0	0	4.30808	-2.59572	0.296223	0.560581
TAF4B	453.144	350.404	540.829	541.095	0.429546	0.0960032	0.282818
OR51V1	0	0	0	0	NA	NA	NA
GAL3ST3	0	0	0	0	NA	NA	NA
MALT1	3148.1	3588.39	2480.96	2428.89	-0.45639	0.00691369	0.0442101
ARVCF	485.023	460.716	689.927	540.233	0.379092	0.128066	0.337888
MEX3B	297.162	228.195	565.833	688.431	1.25621	6.3098e-06	0.000157932
FBXO16	48.9578	63.8081	67.6036	71.5141	0.302438	0.572925	0.791863
KIF7	715.011	779.756	730.674	648.797	-0.116094	0.589089	0.802679
C1QC	0	0	0	0	NA	NA	NA
ZNF783	873.27	898.72	826.06	716.003	-0.200749	0.33388	0.59879
ZNF85	11.3855	7.57045	2.77823	10.3394	-0.526424	0.720725	0.87954
MMP13	29.6024	40.0152	20.3737	18.9555	-0.824736	0.294656	0.558897
RTP3	5.69276	0	0	0	-4.11316	0.394151	NA
ZBED3	1619.02	1779.06	1877.16	1999.81	0.190185	0.278225	0.54053
KDM4D	105.885	139.513	292.64	224.02	1.07302	0.00342318	0.0259676
CLGN	1650.9	1728.23	1296.51	1209.71	-0.431261	0.0150491	0.0793453
SLC25A37	3013.75	2519.88	3153.29	2583.12	0.0519089	0.793993	0.914891
OR5AS1	0	0	0	0	NA	NA	NA
SMARCC2	4068.05	3975.57	3963.61	3999.62	-0.0144752	0.923849	0.973226
CCDC12	569.276	696.481	792.722	740.989	0.276681	0.223001	0.474227
CLHC1	314.24	288.759	303.753	301.565	0.0056842	0.983322	0.993603
AMBRA1	1452.79	1286.98	3275.53	3908.29	1.39087	1.89109e-13	3.19375e-11
USF2	1736.29	2062.41	2086.45	2279.83	0.200848	0.283535	0.546234
DEPDC7	522.596	402.315	566.759	548.849	0.270769	0.286925	0.550254
Human_newGene_2290	103.608	94.0899	106.499	124.934	0.227913	0.587428	0.801401
Human_newGene_14198	0	0	5.55646	1.72323	4.15513	0.248198	NA
DSP	30517.8	25488.6	25570.8	24634.5	-0.157745	0.338843	0.603776
OR10D3	0	0	0	0	NA	NA	NA
FAM20A	29.6024	12.9779	44.4517	33.603	0.875992	0.287176	0.550472
IRF2BP2	5014.19	5207.39	5592.58	6664.6	0.262046	0.124584	0.332914
Human_newGene_22198	4.55421	25.9558	1.85215	0	-4.06554	0.0387911	0.153066
ZNF230	168.506	146.002	360.244	339.477	1.154	0.000115569	0.00178459
MSN	23407.5	20324.5	17856.6	15427.2	-0.393872	0.0206197	0.0992269
SLC9A5	152.566	164.387	223.184	128.381	0.148543	0.721338	0.879627
MUSK	3.41566	0	0	0	-3.37534	0.486912	NA
EPDR1	375.722	410.967	363.948	513.523	0.157899	0.583467	0.799785
SMARCD1	2537.83	3592.72	2126.27	1810.25	-0.63926	0.00530785	0.0366118
SLX1B	422.403	523.442	536.198	624.671	0.295433	0.242454	0.49839
SH3RF3	0	0	1.85215	4.30808	3.91647	0.304452	NA
ZNF347	0	0	0	0	NA	NA	NA
Human_newGene_11695	5.69276	18.3854	10.1868	5.16969	-0.653107	0.631555	0.82878
GTF2E1	1139.69	1137.73	1152.97	817.673	-0.20903	0.381694	0.645596
ATAD2B	1538.18	1500.03	1465.98	1832.66	0.118827	0.552599	0.776423
Human_newGene_13110	77.4216	85.4379	84.273	41.3575	-0.376173	0.514773	0.750001
ARHGAP17	2870.29	3104.97	3444.08	3020.82	0.113524	0.50858	0.745719
KCNIP3	198.108	183.854	162.063	143.89	-0.320296	0.348724	0.613815
Human_newGene_17827	34.1566	45.4227	18.5215	18.9555	-1.08682	0.15454	0.37912
SFPQ	6718.6	7752.14	12598.3	19181.3	1.13497	1.12203e-06	3.51598e-05
PRSS54	0	0	0	0	NA	NA	NA
GFRA4	0	0	0	0	NA	NA	NA
TIGD6	325.626	435.842	356.54	346.369	-0.115898	0.682435	0.85834
AKR1B10	71.7288	90.8454	41.6734	29.2949	-1.19762	0.0376869	0.15041
RGS16	46.6807	69.2155	65.7514	41.3575	-0.11562	0.850203	0.941831
URB1	2316.95	2047.27	1954.95	1730.99	-0.243716	0.18428	0.42214
OR4C46	0	0	0	0	NA	NA	NA
RTL1	0	0	2.77823	1.72323	3.46229	0.420886	NA
TOP3B	1647.49	1266.43	1406.71	1216.6	-0.151521	0.492365	0.733357
NFATC4	62.6204	48.6672	51.8603	27.5717	-0.487749	0.461084	0.708924
Human_newGene_11348	22.771	48.6672	25.9301	46.5272	0.0202894	0.979454	0.992099
CA14	17.0783	17.3039	73.1601	84.4383	2.1967	0.000520001	0.00601073
BMPR1A	1420.91	1667.66	1777.14	1996.36	0.288926	0.132688	0.345848
PRL	0	0	0	0	NA	NA	NA
Human_newGene_2915	78.5601	32.4448	37.9691	35.3262	-0.59773	0.400028	0.659431
STAG2	5680.24	4707.74	4133.08	5071.47	-0.174398	0.371058	0.636119
MOB3C	343.843	322.285	213.924	196.448	-0.699005	0.0144755	0.0768515
LRTOMT	196.97	187.098	242.632	172.323	0.11104	0.752448	0.896368
AC245033.1	0	0	0	186.971	8.83907	0.064755	0.217896
CD55	49548.7	46118.1	28087	28591	-0.755225	1.40648e-07	5.8612e-06
RPS23	15794	15238.2	15483.1	12567.5	-0.145756	0.399054	0.658631
SSX2	0	0	0	0	NA	NA	NA
FBXO27	125.241	148.165	127.799	75.8222	-0.426562	0.351524	0.616364
PRORY	0	0	0	0	NA	NA	NA
SYNGR3	623.927	536.42	474.151	295.534	-0.592703	0.0561063	0.197839
EML1	543.09	524.524	584.354	611.747	0.164085	0.455053	0.70431
SMAD3	3834.64	3760.35	4229.39	5093.87	0.295856	0.0909452	0.273343
NUP93	4850.23	4468.73	4493.32	4633.77	-0.0299691	0.847164	0.940392
TBC1D12	401.909	327.692	647.328	638.457	0.817839	0.000837236	0.0088025
RMC1	700.21	906.291	933.485	1190.75	0.402984	0.101619	0.292608
ADGRG3	74.0059	90.8454	95.3859	57.7282	-0.108071	0.837186	0.935168
MRVI1	0	0	0	0	NA	NA	NA
Human_newGene_18434	0	19.4669	26.8562	0	0.463498	0.919437	0.971833
ZNF581	770.8	651.059	1169.63	929.683	0.56213	0.0156407	0.0816329
CDK12	4031.61	3892.29	5763.9	6469.87	0.626636	9.01377e-05	0.00144184
Human_newGene_8449	6.83131	7.57045	5.55646	16.3707	0.608563	0.65763	0.843744
ELOVL3	26.1867	61.6451	50.0081	17.2323	-0.388421	0.648995	0.83995
Human_newGene_24783	20.4939	5.40746	7.40861	6.03131	-0.945146	0.488834	0.730452
OR51Q1	0	0	0	0	NA	NA	NA
CACNB3	1000.79	681.34	869.586	781.485	-0.0266935	0.918433	0.971475
Human_newGene_23435	23.9096	16.2224	6.48254	3.44646	-2.01825	0.0902027	0.272052
GALNT13	0	3.24448	0	4.30808	0.408628	0.911694	NA
SPO11	0	0	0	0	NA	NA	NA
NEDD4	1083.9	1296.71	1209.46	1404.43	0.134847	0.517568	0.751394
OR5AU1	0	0	0	0	NA	NA	NA
NEK4	1296.81	1338.89	1320.59	1619.84	0.157981	0.42899	0.684517
PRKAR2A	3209.58	3271.52	3244.05	4144.37	0.189109	0.321551	0.58805
ATP6V0B	3000.09	3754.94	3076.43	3822.99	0.0305173	0.882931	0.956563
CACNA1E	229.988	249.825	294.492	211.957	0.0772281	0.813882	0.923218
Human_newGene_10019	222.018	168.713	167.62	187.832	-0.135782	0.698666	0.867272
CEACAM8	0	0	0	0	NA	NA	NA
SKP1	5048.34	5066.79	4679.47	5174	-0.0377731	0.80939	0.921636
PEX14	659.222	904.128	1108.51	913.312	0.370601	0.139908	0.358405
ZBTB38	2335.17	2478.78	2942.15	5933.08	0.88263	0.00411967	0.030112
Human_newGene_3036	455.421	213.054	348.205	297.257	-0.0501163	0.901035	0.965357
Human_newGene_10870	292.608	232.521	225.037	202.48	-0.296557	0.347908	0.613119
Human_newGene_16853	0	2.16299	8.33469	9.47777	3.02763	0.152907	0.37734
FYCO1	1887.72	1661.17	1380.78	1515.58	-0.292948	0.115184	0.3175
FBLIM1	888.071	471.531	919.594	728.927	0.278211	0.403962	0.662222
CMTM1	11.3855	10.8149	23.1519	21.5404	1.00946	0.304735	0.569795
RAPH1	639.867	511.546	981.641	1627.59	1.18062	7.01043e-05	0.00117586
PLTP	2496.85	2399.83	2254.07	1749.08	-0.290803	0.145642	0.367172
MINK1	4627.08	4149.69	4803.56	3162.99	-0.139805	0.553104	0.776921
SLC25A1	3491.94	3517.01	3404.26	3044.95	-0.120144	0.461638	0.709369
EZH2	2433.09	3100.64	3280.16	4674.26	0.523517	0.0274956	0.12156
DOCK8	3.41566	11.8964	12.039	11.201	0.598517	0.657961	0.844033
PLEKHB1	18.2168	29.2003	21.2998	10.3394	-0.586827	0.545182	0.771535
GRB7	817.481	733.252	718.635	410.129	-0.458623	0.142229	0.361998
ZFP37	83.1143	87.6009	72.234	108.564	0.0835995	0.863167	0.947651
MRPL33	834.559	865.194	687.149	787.517	-0.204774	0.327355	0.592229
CFAP73	20.4939	6.48896	12.9651	23.2636	0.428847	0.703655	0.870159
RNASEK	1905.94	2184.62	2134.61	1977.41	0.00740607	0.967145	0.988438
PELO	1628.13	1712	2535.6	2866.59	0.693671	7.14977e-05	0.00119118
ARMC1	1760.2	1793.11	1699.35	1924.85	0.0285878	0.872215	0.952547
AC018362.3	55.7891	18.3854	12.039	15.5091	-1.42663	0.12892	0.339465
SPRN	313.102	418.538	325.053	354.124	-0.107602	0.708797	0.87322
HBEGF	71.7288	80.0305	293.566	340.338	2.06222	1.85807e-09	1.33084e-07
BORA	758.276	669.444	1046.47	1036.52	0.545112	0.0070179	0.0447694
PI4KA	5082.5	5041.92	5058.23	4854.34	-0.0305222	0.838456	0.9357
Human_newGene_16587	143.458	237.928	58.3428	86.1616	-1.39952	0.00280827	0.0223602
POU2AF1	0	0	0	0	NA	NA	NA
MRPL12	3430.46	4696.92	2946.78	3029.44	-0.443624	0.032611	0.136721
R3HDM4	911.981	977.669	1194.64	1246.76	0.369548	0.049504	0.181251
REP15	25.0482	24.8743	24.078	21.5404	-0.130408	0.873895	0.95316
ZC3H3	636.451	685.666	1147.41	1281.22	0.877288	1.31974e-05	0.000300949
RASAL1	0	0	0	0	NA	NA	NA
DDAH1	1486.95	1425.41	1378	1563.83	0.014688	0.93654	0.978118
ACBD5	4135.22	3669.5	3533.91	3438.71	-0.162613	0.320418	0.586647
Human_newGene_5972	480.469	317.959	187.067	64.6212	-1.66678	0.000991104	0.0100134
TMC2	9.10842	8.65194	0	0	-5.75603	0.0249196	0.11293
UGT2B15	0	0	0	0	NA	NA	NA
TIPARP	1670.26	1202.62	2229.07	2719.26	0.784693	0.000775067	0.00829011
SAMD13	11.3855	17.3039	15.7433	18.0939	0.237331	0.815847	0.924312
CCDC137	370.03	426.108	659.367	721.172	0.793991	0.000713452	0.00779171
DNASE1L3	0	0	0	1.72323	2.08249	0.670577	NA
DHRS7C	0	0	0	0	NA	NA	NA
EXD2	1351.46	1112.86	1439.12	1620.7	0.312511	0.125734	0.334224
TRIM72	0	0	25.0041	14.6475	6.60125	0.00119634	0.0115557
DBX2	0	0	0	0	NA	NA	NA
IPO8	5790.68	5453.97	4592.41	4607.06	-0.289594	0.0552592	0.195551
Human_newGene_3111	0	0	13.8911	0	5.08733	0.157971	NA
SYNJ2BP-COX16	56.9276	64.8896	28.7084	15.5091	-1.46483	0.0347045	0.142258
MAP3K14	1529.08	1757.43	2313.34	2395.29	0.518665	0.00357101	0.0267601
PIBF1	781.047	806.794	952.933	1003.78	0.301391	0.122321	0.329503
CCNI2	10.247	10.8149	4.63038	2.58485	-1.54884	0.298784	0.563566
PDE6D	505.517	547.235	442.665	554.019	-0.0787122	0.752656	0.896416
Human_newGene_16526	3.41566	2.16299	4.63038	0	-0.2734	0.921065	NA
ZNF117	60.3433	60.5636	64.8254	74.0989	0.200747	0.698937	0.867345
NKRF	1370.82	1211.27	2612.46	2828.68	1.07554	1.891e-09	1.34841e-07
CLK2	1173.85	1185.32	1185.38	807.334	-0.243848	0.325607	0.590887
CCSER1	54.6505	20.5484	29.6345	33.603	-0.248024	0.757031	0.898691
TNFSF15	2.2771	2.16299	1.85215	0	-1.27082	0.695777	NA
DUSP2	751.445	803.549	312.088	323.967	-1.28965	9.80352e-09	5.60534e-07
TMEM35B	166.229	200.076	110.203	110.287	-0.73265	0.0475915	0.176463
SECISBP2	1563.23	1653.6	1354.85	1465.61	-0.189674	0.287051	0.55043
SPRTN	712.734	885.743	1087.21	981.38	0.371618	0.0918726	0.274797
GABRR2	23.9096	16.2224	38.8952	49.9737	1.14881	0.125946	0.334442
Human_newGene_21642	92.2228	93.0084	123.168	93.0545	0.222522	0.614964	0.81832
Human_newGene_18935	101.331	58.4006	42.5995	16.3707	-1.43977	0.0442901	0.167869
URI1	2207.65	1876.39	1934.57	1879.18	-0.0987048	0.588116	0.801982
Human_newGene_8442	10.247	7.57045	3.70431	15.5091	0.11271	0.936174	0.978106
PIK3C3	858.469	844.646	975.159	1009.81	0.221012	0.249088	0.506954
PAG1	52.3734	43.2597	98.1641	124.934	1.2232	0.0138554	0.0743414
GNG10	1575.76	1407.02	1072.4	1089.08	-0.464524	0.0123657	0.0684828
APOL4	0	8.65194	0	0	-4.71972	0.258983	NA
SLC9C1	0	5.40746	1.85215	2.58485	-0.288511	0.917285	NA
GPCPD1	489.578	421.782	576.946	367.91	0.0517395	0.866636	0.949358
ANKRD28	2947.71	3313.69	2931.96	4883.64	0.319937	0.220743	0.471731
STMN3	290.331	218.462	272.267	180.939	-0.167206	0.645402	0.837227
RAB14	7292.43	7090.27	6447.35	7893.26	-0.0041776	0.98089	0.992388
GRK3	0	0	0	0	NA	NA	NA
CDK2AP2	837.975	874.928	1020.54	1036.52	0.264103	0.167046	0.397051
RIPPLY3	0	0	0	0	NA	NA	NA
HDDC3	245.927	340.67	222.258	269.686	-0.253962	0.43697	0.690183
CXCR2	0	0	0	0	NA	NA	NA
COMMD7	798.125	881.417	726.97	797.856	-0.139402	0.502438	0.741115
AC008770.2	2.2771	2.16299	0	0	-3.75599	0.386316	NA
Human_newGene_23357	80.8372	62.7266	26.8562	21.5404	-1.56937	0.0116079	0.0653007
Human_newGene_19123	709.318	522.361	272.267	105.979	-1.70426	0.000108922	0.001695
ARHGAP45	1663.43	1695.78	1923.46	1600.88	0.0690801	0.715495	0.876998
CXXC1	1332.11	1146.38	1957.73	1863.67	0.624752	0.000810023	0.00860093
HMCN1	43.265	36.7708	23.1519	46.5272	-0.197852	0.787076	0.912837
ESYT3	56.9276	65.9711	50.9342	64.6212	-0.0885589	0.872107	0.952547
CD40	10.247	4.32597	5.55646	0	-1.39715	0.52042	0.753712
DYNC1LI2	9552.46	8056.04	8486.57	8206.03	-0.0770405	0.643293	0.8361
AL845331.2	3.41566	0	0	0	-3.37534	0.486912	NA
EFCAB7	381.415	373.115	297.271	305.012	-0.325039	0.208577	0.456535
GDI1	7205.9	5767.6	6317.69	6229.48	-0.0481628	0.788451	0.913548
Human_newGene_21787	9.10842	4.32597	3.70431	6.89292	-0.338338	0.832898	0.933432
VSNL1	0	0	5.55646	1.72323	4.15513	0.248198	NA
CCDC186	899.456	727.845	1032.58	1337.23	0.542664	0.0232347	0.107646
HEPN1	0	0	0	0	NA	NA	NA
PIH1D1	1768.17	1880.72	1881.79	1887.8	0.0469022	0.780907	0.909823
RAET1G	11.3855	8.65194	17.5955	14.6475	0.686726	0.533732	0.763344
KRTAP5-9	0	0	0	2.58485	2.66592	0.583255	NA
EFTUD2	6141.35	6525.73	5889.85	6494.86	-0.0325098	0.835856	0.934724
Human_newGene_24953	126.379	100.579	52.7864	26.7101	-1.51558	0.00746757	0.0467444
FANCD2OS	2.2771	0	1.85215	0	-0.299395	0.947976	NA
ZNF311	9.10842	21.6299	16.6694	16.3707	0.102133	0.922882	0.97282
HSPB11	899.456	1029.58	786.239	869.37	-0.220521	0.288646	0.552306
AC099850.2	0	0	0	0	NA	NA	NA
SCN4A	94.4999	127.616	163.916	127.519	0.39073	0.349862	0.614807
OR2W3	0	0	0	0	NA	NA	NA
MED10	1564.37	2209.49	2967.15	3509.36	0.779076	0.000663104	0.00733714
ATP6V1G3	0	0	0	0	NA	NA	NA
FAM135A	645.559	562.376	784.387	945.192	0.518262	0.0237496	0.109368
ARHGAP4	54.6505	57.3191	51.8603	49.9737	-0.137113	0.807842	0.920526
EHMT2	5161.06	5225.77	6336.22	6400.08	0.294189	0.0452964	0.170675
STRIP2	630.758	559.132	495.451	520.416	-0.22786	0.3174	0.583649
NDUFAF6	441.758	436.923	363.022	422.192	-0.16194	0.518001	0.751905
Human_newGene_3094	12.5241	14.0594	19.4476	35.3262	1.0438	0.265801	0.525835
Human_newGene_16915	194.692	164.387	212.072	141.305	-0.0235775	0.950939	0.982746
WTIP	395.078	454.227	693.631	807.334	0.821471	0.000517014	0.00598483
COA5	1045.19	998.218	868.66	877.986	-0.226321	0.23562	0.490055
ERMP1	6392.97	4928.36	4645.2	3271.55	-0.516104	0.0286437	0.125107
ACTL9	44.4035	30.2818	3.70431	6.03131	-2.93474	0.00284503	0.0225857
THAP8	163.952	130.861	110.203	118.903	-0.363145	0.354012	0.619251
HACE1	290.331	312.551	279.675	266.239	-0.143451	0.604823	0.812303
C3orf20	0	2.16299	1.85215	8.61616	2.26662	0.380688	NA
SCD5	1929.85	1850.43	1686.39	1623.28	-0.191812	0.257492	0.51674
LSG1	1174.99	1251.29	1547.47	1816.29	0.471399	0.0140548	0.0752657
MAL	0	2.16299	0	2.58485	0.256972	0.952831	NA
SNU13	3432.74	3602.45	3676.52	3130.25	-0.0477134	0.782993	0.911175
GPR22	0	0	0	1.72323	2.08249	0.670577	NA
WDR5B	848.222	727.845	227.815	77.5454	-2.36921	1.44754e-07	5.98567e-06
ACTRT1	0	0	0	0	NA	NA	NA
RD3	0	2.16299	0	0	-2.72193	0.578153	NA
GRIN2C	15.9397	11.8964	37.0431	31.0182	1.29065	0.128515	0.338755
ARMC8	2340.86	3327.75	2683.77	4993.92	0.437701	0.158928	0.385464
Human_newGene_9824	34358.1	24720.8	20393.1	14216.7	-0.77147	0.00149267	0.0137398
Human_newGene_21327	3.41566	2.16299	8.33469	1.72323	0.848646	0.673896	NA
SLC47A1	2253.2	2071.06	1060.36	1672.4	-0.661828	0.009608	0.0567148
DMPK	1583.73	1525.99	1904.94	1962.76	0.314756	0.0629575	0.213832
DEFB105B	0	0	0	0	NA	NA	NA
MTRNR2L6	0	0	0	0	NA	NA	NA
DHRS13	855.053	1049.05	510.268	583.314	-0.800002	0.00052384	0.00605075
CXorf67	0	0	2.77823	0	2.7635	0.569164	NA
C18orf63	0	0	0	3.44646	3.08016	0.524579	NA
SMC1A	16542	15706.5	13841.1	16703.3	-0.0782994	0.642634	0.835664
Human_newGene_21600	0	0	1.85215	5.16969	4.1055	0.25906	NA
KRTAP17-1	0	0	0	0	NA	NA	NA
AC068775.1	0	0	0	0	NA	NA	NA
SMYD5	1088.46	1050.13	1189.08	1083.05	0.0873187	0.644736	0.836905
TUSC2	688.824	770.023	750.122	897.803	0.175906	0.428704	0.68442
CRHR2	5.69276	9.73343	15.7433	16.3707	1.05594	0.368396	0.633296
CCDC155	0	0	0	0	NA	NA	NA
Human_newGene_24521	42.1264	80.0305	45.3778	32.7414	-0.646912	0.326199	0.591426
AL031777.3	88.8071	43.2597	47.2299	23.2636	-0.90661	0.204748	0.451232
PDZD9	0	0	3.70431	7.75454	4.81175	0.11	NA
KIR3DL2	0	0	0	0	NA	NA	NA
GAGE12J	14.8012	0	0	6.89292	-1.09715	0.685674	0.860088
ATP2C1	3739.01	3311.53	2881.02	2735.63	-0.328001	0.0502192	0.183201
TMEM230	2048.26	1841.78	1569.7	1377.72	-0.400386	0.031653	0.133865
MAMSTR	46.6807	33.5263	37.0431	29.2949	-0.273872	0.69337	0.864437
KRTAP10-1	0	0	7.40861	11.201	5.51099	0.0293074	0.126912
CROT	276.668	306.062	221.332	226.605	-0.379649	0.19013	0.430974
PABPC3	7.96987	28.1188	16.6694	9.47777	-0.468429	0.68398	0.859609
EGR1	28.4638	52.9931	815.874	271.409	3.7363	1.09773e-11	1.39778e-09
THSD1	134.349	107.068	285.232	255.038	1.16263	0.000657685	0.00729246
KHK	470.222	502.894	487.116	454.071	-0.0483695	0.836252	0.934742
SLC12A2	767.384	846.809	975.159	1001.2	0.291932	0.140697	0.359665
Human_newGene_480	487.3	497.487	247.262	211.096	-1.10383	2.90015e-05	0.00056537
CD58	315.379	270.373	298.197	261.07	-0.066765	0.817798	0.925561
Human_newGene_21966	278.945	205.484	187.994	155.091	-0.49772	0.155554	0.380443
TMEM8A	1545.02	1347.54	1441.9	1243.31	-0.107342	0.588525	0.802111
AC022400.6	120.687	87.6009	198.18	230.051	1.04091	0.00645459	0.0421137
IFNL3	0	0	0	0	NA	NA	NA
STOX2	2249.78	1815.83	1906.79	1843	-0.116565	0.546323	0.772173
DNAH1	108.162	117.883	87.0512	70.6525	-0.520204	0.24117	0.496832
ZIC4	0	0	0	0	NA	NA	NA
Human_newGene_23350	342.704	304.981	176.881	105.979	-1.19631	0.00128503	0.0122429
OR1G1	0	0	0	0	NA	NA	NA
RNASEK-C17orf49	28.4638	41.0967	47.2299	30.1565	0.151867	0.832325	0.933155
PSMC6	2630.06	2352.25	1958.65	2406.49	-0.190611	0.325314	0.590662
PROKR1	0	0	0	4.30808	3.40159	0.481232	NA
ABCB1	0	0	2.77823	0	2.7635	0.569164	NA
MBD3L2B	0	0	0	0	NA	NA	NA
TMEM252	0	0	0	0	NA	NA	NA
Human_newGene_6177	29.6024	41.0967	36.117	25.8485	-0.191926	0.793328	0.914891
TRAT1	0	0	0	0	NA	NA	NA
PPP4R3B	5046.06	5316.62	5972.27	7698.53	0.399739	0.0343354	0.14094
STRADA	488.439	576.436	576.02	508.353	0.0257575	0.914921	0.969871
LLGL1	2559.47	2718.87	2347.6	2759.75	-0.0474408	0.790467	0.914168
GAGE12C	341.566	287.677	207.441	189.555	-0.664469	0.02687	0.119651
USP54	645.559	594.821	635.289	895.219	0.303636	0.240146	0.495663
MTF1	865.3	733.252	2339.27	2540.9	1.61045	4.60091e-17	1.53785e-14
PAGE2B	0	0	6.48254	0	3.98753	0.39283	NA
ITGB7	0	0	17.5955	8.61616	6.00389	0.00876613	0.0528093
CCDC81	7.96987	16.2224	21.2998	5.16969	0.125545	0.921674	0.972723
PRH1	9.10842	15.1409	14.8172	19.8172	0.513505	0.628943	0.826577
CHKB	671.746	532.094	441.739	311.043	-0.677666	0.0202452	0.0981313
SCUBE1	6.83131	0	1.85215	1.72323	-0.930942	0.736871	NA
ZSCAN10	0	0	11.1129	7.75454	5.52995	0.0278883	0.122923
HUWE1	30088.5	28438.9	31134.7	32915.4	0.130096	0.367983	0.63272
CDH17	2.2771	0	2.77823	0	0.287118	0.946253	NA
CD180	0	2.16299	0	0	-2.72193	0.578153	NA
IL17A	0	0	0	0	NA	NA	NA
TMPO	6272.29	6616.57	5732.41	6908.43	-0.0279952	0.871341	0.952353
Human_newGene_4284	453.144	488.835	234.297	191.279	-1.14696	3.36387e-05	0.000639454
Human_newGene_8557	215.186	165.468	89.8294	95.6393	-1.03669	0.00738802	0.0464472
Human_newGene_23371	398.493	343.915	143.542	88.7464	-1.67761	3.61055e-06	9.68689e-05
GNAT3	0	0	0	0	NA	NA	NA
ACCS	323.349	438.005	242.632	227.467	-0.696122	0.0211842	0.101034
RRAS2	765.107	811.12	1088.14	1126.13	0.490314	0.0109155	0.0622789
OXCT1	8937.64	6730.13	6300.1	7145.38	-0.220617	0.270844	0.531746
LTBP2	201.524	205.484	209.293	194.725	-0.0108493	0.972596	0.990704
Human_newGene_5678	22.771	8.65194	15.7433	10.3394	-0.268014	0.812511	0.922943
MANSC4	0	19.4669	0	0	-5.88944	0.0686714	0.226514
SV2B	1333.24	1557.35	825.134	429.946	-1.2041	0.000173638	0.00249851
PKD1L2	532.843	340.67	344.501	169.738	-0.764875	0.0657143	0.220217
MAP10	0	0	0	0	NA	NA	NA
CYP2A6	0	2.16299	5.55646	4.30808	2.17802	0.389943	NA
PPM1M	554.475	569.947	547.311	503.183	-0.0983099	0.661398	0.84648
AL807752.6	0	0	0	0	NA	NA	NA
ZNF502	0	0	0	0	NA	NA	NA
AL136454.1	68.3131	80.0305	73.1601	49.1121	-0.28023	0.603538	0.811439
GP6	13.6626	8.65194	23.1519	14.6475	0.760763	0.474712	0.719299
CRYBA2	0	0	0	0	NA	NA	NA
Human_newGene_10880	231.126	287.677	187.994	162.845	-0.565081	0.0846973	0.261223
LEF1	162.813	138.431	186.141	139.582	0.112431	0.766909	0.903683
TLNRD1	670.607	693.237	1078.88	1203.68	0.743039	0.000202183	0.00283799
EYA1	50.0963	36.7708	12.039	20.6788	-1.40587	0.0767692	0.243885
EPS8L1	174.199	239.01	291.714	262.793	0.42357	0.196071	0.439108
SERPINB2	0	0	0	0	NA	NA	NA
MAPK14	1189.79	2759.97	2207.77	3648.94	0.568309	0.399403	0.658855
GTF2F2	1726.05	1980.21	1580.81	1659.47	-0.193895	0.286041	0.549215
PLA1A	0	0	0	0	NA	NA	NA
TAF11L9	0	0	0	0	NA	NA	NA
PPP1R42	0	0	0	0	NA	NA	NA
PHETA2	196.97	237.928	227.815	164.569	-0.149349	0.672379	0.851618
HPR	3.41566	0	2.77823	0	-0.299247	0.939709	NA
SATB2	932.474	983.077	1274.28	1156.29	0.343364	0.072928	0.235282
KCNJ9	0	0	3.70431	1.72323	3.73189	0.351203	NA
RRP36	865.3	923.595	1056.65	1254.51	0.369651	0.0721525	0.233595
Human_newGene_2238	64.8975	35.6893	23.1519	2.58485	-1.97122	0.0629607	0.213832
MOCS3	802.68	935.491	546.385	445.455	-0.809875	0.000636036	0.00711615
TEX49	3.41566	0	0	1.72323	-0.978028	0.816958	NA
PPHLN1	1661.15	1823.4	2260.55	2333.25	0.398666	0.0195397	0.0958115
HIST1H2BN	469.084	324.448	418.587	373.08	-0.00311137	0.991638	0.997289
RAPGEF1	3676.39	3677.08	3748.76	3959.12	0.0679399	0.659706	0.845123
MAP3K8	432.65	449.901	287.084	348.954	-0.472199	0.0740124	0.237729
SMIM33	0	0	0	0	NA	NA	NA
DLG4	1981.08	1396.21	1825.3	1027.91	-0.243386	0.435707	0.688922
STC1	233.403	57.3191	96.312	30.1565	-1.20158	0.119981	0.32588
NCCRP1	13.6626	12.9779	18.5215	4.30808	-0.22596	0.857606	0.944742
Human_newGene_20706	367.752	339.589	249.115	196.448	-0.667244	0.0244174	0.111311
EFCAB14	3441.84	2776.19	3348.69	3524.87	0.144706	0.435169	0.688731
Human_newGene_2037	80.8372	76.786	81.4947	56.8666	-0.188889	0.711842	0.875377
AC005832.4	5.69276	6.48896	7.40861	4.30808	-0.0583144	0.970384	0.98985
CPSF3	2607.29	2979.51	2451.32	2930.35	-0.0539321	0.77485	0.906827
TMEM14A	889.209	883.58	612.137	636.734	-0.505314	0.0122209	0.0678684
MYH3	0	5.40746	24.078	19.8172	3.00913	0.0471702	0.175347
GPKOW	1814.85	1687.13	2068.86	2070.46	0.241284	0.153374	0.377785
YY1AP1	3440.71	3567.84	4662.8	5584.99	0.548166	0.00165702	0.015003
SULT1A1	529.427	598.065	451.925	425.638	-0.361829	0.123631	0.331527
SPON1	7.96987	9.73343	27.7823	40.4959	1.9471	0.0353272	0.144075
HOGA1	250.482	239.01	184.289	185.247	-0.405465	0.187523	0.427482
RAB23	622.788	810.038	1703.98	1794.75	1.28767	2.49992e-09	1.69235e-07
PLA2G4A	360.921	418.538	291.714	236.083	-0.563157	0.0494113	0.180994
MAPRE3	614.818	636.999	626.028	563.497	-0.0738681	0.736372	0.886712
OR2A5	0	0	0	0	NA	NA	NA
ZNF516	835.698	599.147	1390.04	835.767	0.633411	0.0416218	0.160712
GGPS1	1159.05	943.062	1140	1382.89	0.263563	0.234793	0.489286
EXOC3L2	0	0	0	0	NA	NA	NA
MAP2K2	4334.47	4558.49	4567.41	4091.81	-0.0384921	0.81143	0.922257
Human_newGene_4540	55.7891	30.2818	31.4866	42.2192	-0.221805	0.753966	0.89711
HIST1H2BB	0	2.16299	0	0	-2.72193	0.578153	NA
RNF19B	544.228	548.317	1041.84	1253.65	1.07127	6.5211e-07	2.22133e-05
ANO2	359.783	380.685	122.242	230.913	-1.06704	0.00525776	0.0363601
TLR8	0	2.16299	0	0	-2.72193	0.578153	NA
Human_newGene_21669	2.2771	1.08149	4.63038	4.30808	1.41549	0.514176	NA
PCDHA9	2.2771	2.16299	0.926077	0	-2.28499	0.514905	NA
Human_newGene_1005	13.6626	18.3854	18.5215	10.3394	-0.153559	0.883844	0.957165
Human_newGene_4081	12.5241	24.8743	26.8562	13.7858	0.116889	0.905979	0.967307
CARS2	2386.41	2825.94	1777.14	2140.25	-0.411993	0.0375987	0.150245
ARHGEF35	0	0	0	0	NA	NA	NA
RHAG	0	0	0	1.72323	2.08249	0.670577	NA
OR2AK2	0	0	0	0	NA	NA	NA
CLUL1	6.83131	3.24448	4.63038	0.861616	-0.879716	0.664923	NA
UNK	1476.7	1558.43	1791.96	1640.52	0.177361	0.31672	0.582936
Human_newGene_17694	7.96987	14.0594	225.037	203.341	4.27574	1.39665e-15	3.44737e-13
EXOC8	2263.44	1703.35	2299.45	2139.39	0.162312	0.43824	0.690884
MAML3	1883.17	1691.45	1868.82	1639.65	-0.0269755	0.884482	0.957369
SAMD1	1578.03	1436.22	1570.63	1198.51	-0.122511	0.571211	0.790542
RSPO4	0	0	0	0	NA	NA	NA
LDHA	27440.3	24535.8	14783	14414	-0.832027	3.71222e-08	1.86121e-06
MRPL20	1262.65	1584.39	1259.46	1337.23	-0.132896	0.518889	0.752514
Human_newGene_15978	2.2771	10.8149	1.85215	5.16969	-0.897619	0.627965	0.8263
Human_newGene_8585	937.029	614.288	1127.96	1158.87	0.560211	0.0317073	0.134014
FAM229B	136.626	158.979	123.168	104.255	-0.379042	0.331802	0.596384
PHF19	4756.87	4916.47	3910.82	3470.59	-0.390188	0.0161155	0.0834056
TTC5	627.342	547.235	515.825	539.371	-0.154363	0.500124	0.739334
KRTAP13-4	0	0	0	0	NA	NA	NA
XKR5	2.2771	0	1.85215	1.72323	0.657242	0.843573	NA
TEX28	0	0	0	0	NA	NA	NA
Human_newGene_8231	53.512	21.6299	31.4866	20.6788	-0.526215	0.526722	0.75764
TCTN1	360.921	317.959	198.18	218.85	-0.702538	0.0151922	0.0799419
RBM14-RBM4	495.27	545.072	1072.4	711.694	0.777733	0.00467017	0.0333015
SPDYE3	59.2047	60.5636	42.5995	54.2818	-0.305265	0.592496	0.804707
PPP2R5C	3920.04	3290.98	3664.49	3499.88	-0.00931645	0.957627	0.985261
CAPG	1843.32	1662.25	1542.84	1331.2	-0.286636	0.132235	0.345236
MPZL1	1311.61	1390.8	1257.61	1316.55	-0.0701492	0.696703	0.866552
VPS9D1	646.698	652.14	609.358	529.032	-0.190478	0.393668	0.65478
ARSB	724.119	810.038	576.946	639.319	-0.334949	0.124398	0.33253
TSSK3	432.65	280.107	807.539	579.006	0.96028	0.00258259	0.0209057
PARPBP	815.204	1171.26	1035.35	938.299	-0.00965854	0.969017	0.989012
ANKRD30BL	0	0	0	0	NA	NA	NA
CRISPLD1	0	0	0	0	NA	NA	NA
PRR5-ARHGAP8	22.771	0	20.3737	3.44646	0.065461	0.972153	0.990488
MAD1L1	849.36	1063.11	1428.01	1811.12	0.760118	0.000921786	0.00946201
SPIN4	732.089	567.784	446.369	423.915	-0.578636	0.0209514	0.100401
AMPD1	0	0	0	0	NA	NA	NA
DPYSL5	1170.43	1275.08	1227.98	1192.48	-0.0149812	0.935275	0.97807
INPP1	396.216	391.5	446.369	410.129	0.120633	0.62216	0.822969
ANKRD11	11069	16573.9	17760.3	22457.1	0.540902	0.0229537	0.106652
Human_newGene_6689	0	0	0	0	NA	NA	NA
NPAS4	0	0	0	0	NA	NA	NA
NFKBID	92.2228	157.898	75.9383	81.8535	-0.665186	0.168337	0.398701
Human_newGene_20946	11.3855	20.5484	2.77823	3.44646	-2.35835	0.0828115	0.257386
RNASE9	0	0	0	0	NA	NA	NA
GUCY2D	3.41566	0	0	0	-3.37534	0.486912	NA
TMEM238L	0	0	0	0	NA	NA	NA
Human_newGene_19185	6.83131	21.6299	8.33469	7.75454	-0.825134	0.516179	0.750744
FGF4	0	0	0	0	NA	NA	NA
CPM	144.596	158.979	131.503	78.407	-0.533609	0.227595	0.480085
SLC26A4	18.2168	6.48896	16.6694	10.3394	0.129662	0.913233	0.969234
CFAP299	0	0	0	0	NA	NA	NA
PLD5	0	0	0	0	NA	NA	NA
GATD1	923.366	1196.13	677.888	525.585	-0.816998	0.00122182	0.0117735
SIPA1L1	6980.47	6133.15	6794.62	7617.54	0.13628	0.415963	0.674453
FBXO5	1169.29	1152.87	1963.28	2360.83	0.897061	2.74378e-06	7.64256e-05
DPYS	3.41566	0	0	2.58485	-0.39424	0.921312	NA
ATG4D	906.288	882.498	1015.91	988.273	0.164029	0.389009	0.650974
TGM3	1.13855	0	0	0	-1.78223	0.721131	NA
MTCH1	6832.45	6833.95	7379.9	6973.05	0.0706969	0.632646	0.829406
HK1	5128.04	4169.15	5631.47	4888.81	0.178323	0.343272	0.60782
CDC26	653.529	731.089	567.685	486.813	-0.393326	0.0882237	0.267877
GALNT12	0	7.57045	0	0	-4.5271	0.302126	NA
MRPL35	1472.15	1384.31	1557.66	1917.09	0.282878	0.154013	0.378578
TNKS	3520.4	3314.78	4294.22	5254.99	0.482488	0.00760179	0.047438
Human_newGene_15403	2.2771	0	24.078	24.9869	4.45155	0.00480209	0.0339465
TICRR	1571.2	1209.11	2022.55	1811.98	0.463918	0.0287752	0.125317
DNAJC25-GNG10	237.957	383.93	357.466	294.673	0.067732	0.843216	0.93818
ZNF497	59.2047	152.49	69.4557	79.2686	-0.510129	0.387078	0.649446
SLC30A4	186.723	158.979	205.589	210.234	0.266847	0.419409	0.676894
Human_newGene_9924	34.1566	8.65194	18.5215	18.9555	-0.189653	0.856001	0.943957
CDY1B	0	0	0	0	NA	NA	NA
TUB	1359.43	909.535	906.629	545.403	-0.644139	0.0441194	0.167313
TRMT13	579.523	522.361	415.808	442.009	-0.360959	0.124122	0.332013
ARHGEF18	2430.81	2327.37	2744.89	1406.16	-0.197088	0.517372	0.751333
KCNK1	4382.29	4672.05	3785.8	4493.33	-0.129084	0.457482	0.706698
ARRB1	504.379	558.05	546.385	576.421	0.0796762	0.725196	0.881108
SCAMP5	228.849	216.299	189.846	306.735	0.158531	0.662241	0.84695
RUNDC3B	109.301	74.623	149.098	88.7464	0.370757	0.456826	0.706236
EREG	0	0	1.85215	0	2.17711	0.65609	NA
Human_newGene_17837	15.9397	18.3854	4.63038	9.47777	-1.27977	0.278017	0.540274
IL17RB	1028.11	934.41	776.978	889.187	-0.235897	0.254001	0.512983
ADAMTS20	0	0	0	0	NA	NA	NA
MCAM	9865.56	11479	8619	9937.01	-0.201975	0.244201	0.500507
POLR3E	2262.3	2424.71	3041.24	3322.39	0.441184	0.00807842	0.0496211
OR7C1	4.55421	8.65194	3.70431	0	-1.84441	0.415828	NA
AQR	3716.24	3275.84	3192.19	3808.34	0.00186043	0.991925	0.997369
IPMK	910.842	735.415	1682.68	2008.43	1.1652	7.68176e-08	3.56203e-06
CDCA7	1755.65	1656.85	1005.72	1015.84	-0.755293	2.17527e-05	0.000445153
ELOA3B	10.247	2.16299	0.926077	0	-3.77502	0.159244	NA
CAMP	11.3855	22.7113	10.1868	0	-1.74978	0.306965	0.572163
TBC1D26	0	0	3.70431	0	3.17928	0.511	NA
GRHL3	0	0	0	0	NA	NA	NA
DCAF8L2	2.2771	2.16299	1.85215	0	-1.27082	0.695777	NA
ADAMTSL2	2.2771	0	2.77823	0	0.287118	0.946253	NA
DENND5B	3260.81	3188.24	3398.7	3761.81	0.15104	0.350791	0.615563
CLMN	1079.35	714.867	1305.77	1102.01	0.424526	0.107777	0.304374
UGT1A4	0	0	0	0	NA	NA	NA
SSTR3	0	0	0	0	NA	NA	NA
OVOL2	0	0	0	0	NA	NA	NA
RBL2	5216.85	4228.64	4057.14	3505.91	-0.320654	0.0929289	0.276827
PYGO2	3399.72	3584.07	3497.79	3385.29	-0.0210002	0.893034	0.961145
PPP1R10	2315.82	3565.68	3476.49	2854.53	0.106109	0.671241	0.850999
Human_newGene_19643	9.10842	7.57045	6.48254	10.3394	0.0143014	0.991553	0.997289
Human_newGene_7157	17.0783	8.65194	5.55646	0	-2.22014	0.229195	0.48213
CSE1L	15076.7	16413.8	14968.2	18567.8	0.0908049	0.608803	0.814513
RDH16	11.3855	15.1409	7.40861	15.5091	-0.209433	0.857405	0.9446
LCA5	318.795	267.129	486.19	523.001	0.784893	0.00252816	0.0205709
ASRGL1	0	0	0	0	NA	NA	NA
Human_newGene_979	104.747	76.786	127.799	109.425	0.386411	0.383256	0.646782
TOM1	952.968	913.861	1242.79	1049.45	0.296041	0.145262	0.366559
MTRNR2L13	0	0	0	0	NA	NA	NA
PTX3	0	0	0	0	NA	NA	NA
Human_newGene_128	0	0	2.77823	0	2.7635	0.569164	NA
SCGB3A1	0	0	2.77823	0	2.7635	0.569164	NA
MRPL50	1206.87	1060.94	1017.76	969.317	-0.190588	0.330467	0.595196
Human_newGene_20831	20.4939	18.3854	18.5215	42.2192	0.645595	0.466446	0.713621
SLC26A11	572.692	547.235	755.679	607.439	0.283286	0.230313	0.483658
RCAN3	771.939	859.787	372.283	697.047	-0.609235	0.0633268	0.214741
STYX	1467.59	1441.63	1326.14	1343.26	-0.124086	0.477416	0.720539
POM121L2	0	0	0	0	NA	NA	NA
CINP	742.336	752.719	801.982	707.386	0.013545	0.948538	0.982203
2022-03-07	1929.85	1657.93	2451.32	3000.15	0.603738	0.00240351	0.0198827
VCX	4.55421	0	0	0	-3.79091	0.433248	NA
PFKM	10183.2	8194.47	7849.43	6104.55	-0.397296	0.053156	0.190642
SGMS1	1452.79	2396.59	1758.62	3418.89	0.427642	0.216316	0.466351
OPN1MW3	0	0	0	0	NA	NA	NA
RIOK3	1830.79	1142.06	2248.51	2615.86	0.710648	0.00658927	0.0427663
AC087289.3	37.5722	10.8149	31.4866	42.2192	0.610061	0.493015	0.733829
L34079.1	0	0	0	0	NA	NA	NA
PPP1R12C	1493.78	1701.19	1976.25	2179.89	0.379407	0.0387629	0.153059
GRAMD4	1312.75	1065.27	1134.44	726.342	-0.35405	0.199669	0.443942
GOLGA8S	0	0	0	0	NA	NA	NA
ATG9A	2405.76	3168.77	1634.53	2493.52	-0.433313	0.096842	0.284306
MRPS26	867.577	1182.07	1115	1171.8	0.15775	0.493899	0.734232
TMEM40	36.4337	6.48896	10.1868	19.8172	-0.513042	0.661656	0.846607
ELP3	1398.14	1435.14	1446.53	1946.39	0.260215	0.231723	0.485474
ZNF787	1160.18	1355.11	1900.31	2095.45	0.667664	0.00046102	0.00547948
USP17L22	0	0	0	0	NA	NA	NA
Human_newGene_24303	18.2168	4.32597	3.70431	0	-2.61595	0.193947	0.436179
AL139353.1	6.83131	4.32597	39.8213	14.6475	2.28832	0.0460009	0.172399
GPAT2	4.55421	11.8964	12.039	10.3394	0.440966	0.736921	0.886892
MIGA1	1556.4	1204.78	1315.95	1151.98	-0.161927	0.46057	0.708814
PELI1	414.433	478.02	1222.42	1385.48	1.54686	5.99246e-13	9.6143e-11
C8orf34	0	0	0	0	NA	NA	NA
PPT1	3055.87	4407.08	4534.07	2479.73	-0.0896797	0.770773	0.905058
SLC35C2	1234.19	1495.7	1442.83	1298.45	0.00576837	0.977279	0.991875
NPIPB3	384.831	164.387	438.034	479.058	0.740472	0.0728086	0.235133
MUC4	10.247	8.65194	0	1.72323	-3.43438	0.102426	0.294291
RFC4	1442.55	1631.97	1753.99	1768.9	0.196299	0.27386	0.535407
GNB2	5843.05	5970.92	6520.51	6324.26	0.120668	0.412867	0.67081
ZNF724	114.994	81.112	92.6077	104.255	0.00655912	0.988546	0.996376
NUP50	5523.12	5976.33	7318.78	10281.7	0.614076	0.0035221	0.0265348
[truncated: 20,335 more rows]
