# Supplementary material for: Activation of the cGAS-STING pathway by a mitochondrial DNA-targeted emissive rhodium(iii) metallointercalator
Source: Royal Society of Chemistry journal article supplement (doi:10.1039/d3sc01737k), 2023-01-01
Supplement: d3sc01737k6.xlsx [file d3sc01737k6.xlsx]

## Sheet: Sheet1
Supplementary Data S5. The integration analysis of RRBS and RNA-seq
Gene_Symbol	exp_stat	exp_fc	exp_q	DMR_num	DMR_stat	DMR_1	DMR_2	DMR_3
ZNF416	Up	1.525	5.4359e-06	1	Hyper	chr19,58089915,58089961,0.127,4.6097e-02
TLX3	Up	1.082	0.0087154	1	Hyper	chr5,170735321,170735411,0.136,1.3342e-03
FOXQ1	Down	-1.398	0.0011418	3	Hyper,Hyper,Hyper	chr6,1312933,1313344,0.150,1.0106e-11	chr6,1312015,1312316,0.207,5.3690e-10	chr6,1312371,1312933,0.115,3.6776e-03
NUDT17	Up	1.405	0.0029211	1	Hyper	chr1,145589392,145589535,0.189,9.8504e-12
SYT2	Up	2.782	0.032659	1	Hyper	chr1,202612088,202612100,0.368,2.4340e-02
ZNF596	Up	1.706	0.010755	1	Hyper	chr8,181955,182083,0.152,2.9011e-11
HBEGF	Up	2.062	1.3308e-07	1	Hyper	chr5,139725782,139725853,0.170,2.8659e-02
TBX2	Up	1.687	0.0050624	2	Hyper,Hyper	chr17,59477715,59477905,0.299,9.8504e-12	chr17,59477145,59477710,0.138,1.8461e-04
SLC25A44	Up	1.234	1.2067e-09	1	Hyper	chr1,156163409,156163507,0.113,1.5018e-04
PSPN	Up	2.117	1.7147e-05	1	Hyper	chr19,6376576,6376609,0.410,8.7962e-03
THSD1	Up	1.163	0.0072925	1	Hyper	chr13,52980095,52980202,0.421,2.4759e-07
SV2B	Down	-1.204	0.0024985	1	Hypo	chr15,91642952,91643027,-0.102,3.7977e-02
HSPA6	Up	3.615	0.00034798	2	Hyper,Hyper	chr1,161494679,161494708,0.262,3.5984e-04	chr1,161494598,161494630,0.146,2.4340e-02
HRCT1	Down	-1.127	0.0055121	1	Hyper	chr9,35906471,35906533,0.137,3.7084e-03
SOX17	Up	1.247	0.044425	2	Hyper,Hyper	chr8,55370902,55371030,0.145,3.8664e-03	chr8,55370363,55370423,0.112,2.9088e-02
ZNF136	Up	1.059	0.00028531	2	Hyper,Hyper	chr19,12272370,12272408,0.103,1.1217e-02	chr19,12272282,12272291,0.184,2.8659e-02
MC1R	Up	1.154	6.1195e-07	1	Hyper	chr16,89984618,89984691,0.131,8.3682e-04
ZNF134	Up	1.673	1.6726e-17	1	Hyper	chr19,58124331,58124357,0.214,3.2890e-02
ADRB2	Down	-1.304	0.048922	1	Hyper	chr5,148206092,148206337,0.179,1.4731e-08
MSANTD1	Up	4.134	1.6837e-05	1	Hyper	chr4,3251225,3251304,0.128,1.1217e-02
EFCAB12	Up	3.771	0.00090504	1	Hyper	chr3,129147397,129147695,0.188,9.8504e-12
TRPM5	Up	6.551	0.012471	1	Hyper	chr11,2444899,2444997,0.122,3.6658e-02
PTBP1	Up	1.215	0.00081544	1	Hyper	chr19,796031,796097,0.107,1.2992e-02
ARHGEF5	Up	1.107	0.0086509	1	Hypo	chr7,144052483,144052504,-0.161,2.8659e-02
LTB4R	Up	1.243	7.2163e-07	1	Hyper	chr14,24780761,24780826,0.274,1.7350e-06
HAS3	Up	2.325	1.1982e-07	1	Hyper	chr16,69139953,69139980,0.140,2.8659e-02
RARA	Up	1.056	3.6685e-06	1	Hyper	chr17,38498633,38498655,0.282,2.7899e-03
CD24	Down	-1.17	0.015886	1	Hyper	chrY,21154972,21154998,0.216,2.6383e-03
DENND2C	Up	1.142	0.0029157	1	Hyper	chr1,115212262,115212567,0.156,9.8504e-12
TRIM4	Up	1.045	1.99e-05	1	Hyper	chr7,99516794,99516896,0.253,5.9673e-04
MUC6	Up	1.976	0.047976	1	Hyper	chr11,1037802,1038003,0.101,1.6735e-02
CLCN5	Up	1.532	0.0093735	1	Hyper	chrX,49687668,49687729,0.167,2.5511e-02
P2RX2	Up	4.852	1.6934e-05	1	Hyper	chr12,133195399,133195457,0.109,3.2890e-02
EN2	Up	1.088	0.0047051	3	Hyper,Hyper,Hypo	chr7,155250785,155251127,0.189,5.1440e-08	chr7,155249972,155250035,0.441,1.3166e-05	chr7,155249640,155249675,-0.202,6.5308e-04
APCDD1	Down	-1.157	0.047465	1	Hyper	chr18,10455088,10455104,0.225,1.2136e-02
ZNF525	Up	1.165	0.012141	1	Hyper	chr19,53868983,53869021,0.197,6.9803e-03
ZNF567	Up	1.294	0.00027859	1	Hyper	chr19,37178531,37178562,0.258,1.1448e-03
NPTX1	Down	-1.212	0.0022214	3	Hyper,Hyper,Hypo	chr17,78450083,78450683,0.144,1.2034e-08	chr17,78449423,78450076,0.231,2.1878e-03	chr17,78451301,78452364,-0.130,2.8640e-02
TOLLIP	Up	1.102	2.179e-05	2	Hyper,Hyper	chr11,1331386,1331463,0.525,2.7957e-07	chr11,1331496,1331794,0.108,3.6023e-02
PRICKLE1	Up	1.493	2.7724e-05	2	Hyper,Hyper	chr12,42982939,42983366,0.121,3.2615e-10	chr12,42983377,42983659,0.183,3.1816e-09
FOXO3	Up	1.004	0.011526	1	Hyper	chr6,108882562,108882597,0.135,6.5308e-04
PEX5L	Up	1.335	0.013157	1	Hypo	chr3,179754989,179755031,-0.130,3.6658e-02
TMEM88	Up	8.067	4.6615e-05	1	Hyper	chr17,7758192,7758264,0.281,3.2890e-02
FJX1	Down	-1.158	0.009013	1	Hypo	chr11,35639523,35639632,-0.271,2.4340e-02
TRIM36	Up	1.108	4.4921e-05	2	Hyper,Hyper	chr5,114516046,114516173,0.182,9.8504e-12	chr5,114515499,114516041,0.132,1.8982e-05
ZBTB40	Up	1.017	4.2119e-06	1	Hypo	chr1,22777875,22778006,-0.115,3.8732e-02
